# Supplementary material for: Causal association between sleep traits and the risk of coronary artery disease in patients with diabetes
Source: PubMed Central journal article supplement (PMC10020648; doi:10.3389/fcvm.2023.1132281), 2023-03-03

## Supplementary method

The diabetes and CAD were defined based on UK Biobank's baseline assessment verbal health interview, combined with linked data from hospital admissions and death registries. The average age at visit was  $62.7 \pm 5.6$  and  $60.2 \pm 7.0$  for CAD group and non-CAD group, respectively. 74.0% of CAD group and 60.2% of non-CAD group were male. In the CAD group, 268 (6.8%) individuals were with type I diabetes, while in the non-CAD group 945 (8.1%) individuals were with type I diabetes. The rest were with type II diabetes. Specifically, CAD was defined as having a recorded death or hospitalization with primary or secondary diagnosis recorded with the ICD version 10 codes I20, angina pectoris; I21, acute myocardial infarction; I22 subsequent ST elevation (STEMI) and non-ST elevation (NSTEMI) myocardial infarction; I23, certain current complications following ST elevation (STEMI) and non-ST elevation (NSTEMI) myocardial infarction; I24, other acute ischaemic heart diseases; or I25, chronic ischaemic heart disease and ICD-9 codes: 410, acute myocardial infarction; 411, other acute and subacute forms of ischaemic heart disease; 412, old myocardial infarction or 413 angina pectoris. Further, individuals were classified as CAD if they reported angina pectoris or myocardial infarction at the verbal interview. A trained nurse and a doctor examined and matched it to entries in the coding tree. Individuals not fulfilling the above criteria were defined as not having CAD.

Table S1. Genome-wide significant ( $p < 5 \times 10^{-8}$ ) single nucleotide polymorphisms that were used as instruments for insomnia.

| SNP         | Chr | Pos       | EA | OA | EAF  | Beta   | Se    | <i>P</i> -value |
|-------------|-----|-----------|----|----|------|--------|-------|-----------------|
| rs699844    | 1   | 74878253  | A  | G  | 0.92 | 0.060  | 0.011 | 4.1E-08         |
| rs6702604   | 1   | 107190062 | A  | G  | 0.58 | -0.037 | 0.006 | 1.3E-09         |
| rs623025    | 1   | 201765094 | T  | C  | 0.26 | -0.038 | 0.007 | 3.2E-08         |
| rs5877      | 1   | 173878862 | T  | C  | 0.67 | 0.036  | 0.006 | 1.2E-08         |
| rs2089358   | 1   | 37194103  | T  | C  | 0.70 | -0.041 | 0.007 | 2.7E-10         |
| rs1937447   | 1   | 66358242  | C  | G  | 0.76 | -0.039 | 0.007 | 2.1E-08         |
| rs1620977   | 1   | 72729142  | A  | G  | 0.27 | 0.052  | 0.007 | 2.3E-14         |
| rs1289939   | 1   | 117944435 | T  | C  | 0.23 | -0.041 | 0.007 | 6.0E-09         |
| rs12030482  | 1   | 96961268  | A  | T  | 0.22 | 0.041  | 0.007 | 8.2E-09         |
| rs11803128  | 1   | 190060095 | A  | G  | 0.65 | -0.041 | 0.006 | 6.9E-11         |
| rs11588755  | 1   | 57819204  | A  | G  | 0.52 | -0.035 | 0.006 | 5.1E-09         |
| rs11119409  | 1   | 210293333 | T  | C  | 0.59 | -0.035 | 0.006 | 1.2E-08         |
| rs10800992  | 1   | 190900576 | T  | C  | 0.44 | 0.042  | 0.006 | 3.8E-12         |
| rs823247    | 2   | 2850540   | T  | C  | 0.48 | -0.037 | 0.006 | 5.2E-10         |
| rs7599697   | 2   | 239231477 | T  | C  | 0.36 | -0.037 | 0.006 | 5.0E-09         |
| rs7571486   | 2   | 176473295 | A  | G  | 0.25 | -0.039 | 0.007 | 1.4E-08         |
| rs75452188  | 2   | 67134426  | A  | G  | 0.88 | 0.052  | 0.009 | 1.6E-08         |
| rs72820274  | 2   | 104412924 | A  | G  | 0.42 | 0.034  | 0.006 | 1.3E-08         |
| rs6756610   | 2   | 147480394 | C  | G  | 0.63 | 0.037  | 0.006 | 1.1E-09         |
| rs6734957   | 2   | 42813247  | T  | G  | 0.24 | -0.042 | 0.007 | 1.8E-09         |
| rs6545798   | 2   | 60521311  | A  | T  | 0.41 | -0.041 | 0.006 | 1.2E-11         |
| rs62213452  | 2   | 210380152 | T  | G  | 0.28 | 0.037  | 0.007 | 2.4E-08         |
| rs62158170  | 2   | 114082175 | A  | G  | 0.79 | 0.066  | 0.007 | 1.2E-19         |
| rs56097173  | 2   | 44262449  | T  | C  | 0.68 | 0.040  | 0.006 | 2.7E-10         |
| rs55772859  | 2   | 208042581 | A  | C  | 0.31 | 0.042  | 0.006 | 4.8E-11         |
| rs4664299   | 2   | 160570033 | T  | C  | 0.23 | -0.041 | 0.007 | 5.0E-09         |
| rs34967082  | 2   | 215382654 | A  | G  | 0.41 | 0.035  | 0.006 | 4.3E-09         |
| rs1861412   | 2   | 58893065  | A  | G  | 0.43 | 0.038  | 0.006 | 1.7E-10         |
| rs1530938   | 2   | 236900633 | A  | G  | 0.44 | 0.036  | 0.006 | 8.8E-10         |
| rs1519102   | 2   | 66677816  | C  | G  | 0.69 | -0.037 | 0.006 | 1.9E-08         |
| rs13010288  | 2   | 51824512  | T  | G  | 0.13 | -0.060 | 0.009 | 9.3E-12         |
| rs12991815  | 2   | 68071990  | C  | G  | 0.42 | 0.040  | 0.006 | 3.0E-11         |
| rs11679943  | 2   | 77724624  | A  | G  | 0.35 | 0.037  | 0.006 | 3.2E-09         |
| rs116466468 | 2   | 159137557 | T  | C  | 0.76 | 0.044  | 0.007 | 2.1E-10         |
| rs113851554 | 2   | 66750564  | T  | G  | 0.05 | 0.206  | 0.014 | 1.6E-51         |
| rs10928256  | 2   | 146458738 | T  | C  | 0.42 | 0.034  | 0.006 | 1.6E-08         |
| rs7625896   | 3   | 44062561  | A  | G  | 0.65 | 0.036  | 0.006 | 5.3E-09         |

|            |   |           |   |   |      |        |       |         |
|------------|---|-----------|---|---|------|--------|-------|---------|
| rs7615602  | 3 | 18718055  | C | G | 0.27 | -0.040 | 0.007 | 2.6E-09 |
| rs694786   | 3 | 173112907 | T | C | 0.46 | -0.044 | 0.006 | 2.0E-13 |
| rs6808140  | 3 | 10581380  | T | C | 0.51 | 0.039  | 0.006 | 5.4E-11 |
| rs62264767 | 3 | 117642005 | A | C | 0.85 | 0.065  | 0.008 | 1.6E-14 |
| rs492858   | 3 | 155432229 | T | C | 0.08 | -0.066 | 0.011 | 3.5E-09 |
| rs4858708  | 3 | 25154112  | A | T | 0.53 | -0.034 | 0.006 | 1.2E-08 |
| rs4260410  | 3 | 178469932 | T | C | 0.33 | 0.034  | 0.006 | 4.9E-08 |
| rs3774751  | 3 | 50209053  | T | G | 0.46 | -0.041 | 0.006 | 7.3E-12 |
| rs35110063 | 3 | 43066558  | A | G | 0.43 | 0.039  | 0.006 | 8.8E-11 |
| rs2364921  | 3 | 158522463 | T | C | 0.47 | -0.034 | 0.006 | 2.1E-08 |
| rs2216427  | 3 | 180785697 | C | G | 0.65 | 0.035  | 0.006 | 1.6E-08 |
| rs17025198 | 3 | 88001713  | A | G | 0.20 | 0.041  | 0.007 | 2.2E-08 |
| rs1580173  | 3 | 107955515 | A | G | 0.56 | 0.033  | 0.006 | 2.3E-08 |
| rs1567084  | 3 | 71435955  | A | G | 0.50 | 0.033  | 0.006 | 2.1E-08 |
| rs10865954 | 3 | 49211989  | T | C | 0.33 | 0.042  | 0.006 | 1.9E-11 |
| rs72657797 | 4 | 90820809  | T | C | 0.18 | -0.056 | 0.008 | 1.5E-12 |
| rs62301574 | 4 | 22050165  | C | G | 0.80 | -0.042 | 0.007 | 1.4E-08 |
| rs4699157  | 4 | 106055212 | T | C | 0.96 | -0.081 | 0.015 | 4.0E-08 |
| rs17005118 | 4 | 82288564  | A | G | 0.26 | 0.042  | 0.007 | 6.1E-10 |
| rs16990210 | 4 | 34720226  | T | C | 0.85 | -0.046 | 0.008 | 2.0E-08 |
| rs13138995 | 4 | 148987430 | A | G | 0.39 | 0.034  | 0.006 | 2.0E-08 |
| rs13135092 | 4 | 103198082 | A | G | 0.92 | -0.089 | 0.011 | 2.5E-16 |
| rs11722569 | 4 | 112822731 | T | C | 0.66 | 0.034  | 0.006 | 2.9E-08 |
| rs8180457  | 5 | 107209814 | T | C | 0.16 | -0.056 | 0.008 | 1.1E-11 |
| rs701394   | 5 | 80296487  | A | G | 0.64 | -0.036 | 0.006 | 6.8E-09 |
| rs6888135  | 5 | 141254063 | A | C | 0.50 | 0.038  | 0.006 | 1.2E-10 |
| rs6601080  | 5 | 179511043 | A | G | 0.68 | 0.035  | 0.006 | 2.2E-08 |
| rs62383308 | 5 | 165460085 | A | G | 0.08 | -0.060 | 0.011 | 4.0E-08 |
| rs55972276 | 5 | 135653737 | A | C | 0.14 | 0.073  | 0.009 | 4.2E-17 |
| rs4502882  | 5 | 153093998 | T | C | 0.66 | -0.039 | 0.006 | 8.0E-10 |
| rs35539975 | 5 | 91607148  | A | G | 0.78 | 0.042  | 0.007 | 4.5E-09 |
| rs2431108  | 5 | 103947968 | T | C | 0.67 | -0.053 | 0.006 | 7.8E-17 |
| rs17367725 | 5 | 107112116 | T | C | 0.35 | -0.036 | 0.006 | 9.3E-09 |
| rs17223714 | 5 | 50492629  | A | G | 0.79 | 0.046  | 0.007 | 2.4E-10 |
| rs17083297 | 5 | 92995477  | A | C | 0.18 | -0.044 | 0.008 | 1.6E-08 |
| rs16903122 | 5 | 87693561  | T | C | 0.25 | 0.055  | 0.007 | 9.0E-16 |
| rs152555   | 5 | 106849674 | A | G | 0.85 | -0.052 | 0.008 | 4.8E-10 |
| rs12520974 | 5 | 61514611  | T | C | 0.48 | -0.036 | 0.006 | 1.7E-09 |
| rs12187443 | 5 | 102660400 | T | C | 0.67 | 0.040  | 0.006 | 1.6E-10 |
| rs9394502  | 6 | 38452503  | T | C | 0.33 | -0.054 | 0.006 | 7.8E-18 |

|             |   |           |   |   |      |        |       |         |
|-------------|---|-----------|---|---|------|--------|-------|---------|
| rs9373590   | 6 | 101212001 | A | T | 0.51 | 0.040  | 0.006 | 2.2E-11 |
| rs728017    | 6 | 124292594 | A | G | 0.39 | -0.035 | 0.006 | 9.5E-09 |
| rs6457796   | 6 | 34828553  | T | C | 0.73 | -0.039 | 0.007 | 1.1E-08 |
| rs62429521  | 6 | 140324582 | A | C | 0.15 | 0.051  | 0.008 | 1.8E-09 |
| rs4709655   | 6 | 163280204 | T | C | 0.12 | -0.054 | 0.009 | 3.1E-09 |
| rs314281    | 6 | 105400605 | T | C | 0.45 | -0.043 | 0.006 | 6.0E-13 |
| rs3131638   | 6 | 31475127  | A | G | 0.23 | -0.044 | 0.007 | 7.9E-10 |
| rs2388840   | 6 | 99598756  | A | G | 0.58 | -0.037 | 0.006 | 1.4E-09 |
| rs138678612 | 6 | 30932223  | A | G | 0.98 | -0.117 | 0.020 | 1.4E-08 |
| rs11756035  | 6 | 18843810  | C | G | 0.13 | 0.051  | 0.009 | 1.3E-08 |
| rs117152417 | 6 | 166411281 | A | G | 0.01 | -0.147 | 0.026 | 2.8E-08 |
| rs1147852   | 6 | 147980909 | A | G | 0.31 | 0.039  | 0.006 | 9.9E-10 |
| rs10947987  | 6 | 41754370  | T | C | 0.44 | -0.033 | 0.006 | 4.1E-08 |
| rs10947690  | 6 | 37631768  | A | G | 0.74 | -0.047 | 0.007 | 4.0E-12 |
| rs10947428  | 6 | 33647058  | T | C | 0.79 | -0.068 | 0.007 | 9.1E-21 |
| rs10944696  | 6 | 94498850  | A | G | 0.30 | -0.038 | 0.007 | 8.0E-09 |
| rs8180817   | 7 | 114047542 | C | G | 0.43 | -0.049 | 0.006 | 1.8E-16 |
| rs75932578  | 7 | 106844694 | T | C | 0.22 | -0.040 | 0.007 | 4.1E-08 |
| rs73671843  | 7 | 3520024   | A | G | 0.13 | -0.056 | 0.009 | 5.5E-10 |
| rs6978112   | 7 | 1966841   | T | C | 0.41 | 0.034  | 0.006 | 2.1E-08 |
| rs6967168   | 7 | 132672192 | T | G | 0.75 | -0.044 | 0.007 | 1.4E-10 |
| rs670501    | 7 | 108625185 | T | C | 0.21 | 0.053  | 0.007 | 7.4E-13 |
| rs6465151   | 7 | 88310899  | T | C | 0.11 | 0.056  | 0.009 | 1.9E-09 |
| rs521484    | 7 | 49894349  | A | G | 0.77 | -0.040 | 0.007 | 1.5E-08 |
| rs2598293   | 7 | 133989882 | T | C | 0.48 | 0.035  | 0.006 | 2.5E-09 |
| rs2030672   | 7 | 21687925  | C | G | 0.56 | 0.034  | 0.006 | 1.1E-08 |
| rs190073    | 7 | 10985188  | A | G | 0.41 | -0.034 | 0.006 | 2.9E-08 |
| rs17520265  | 7 | 119674508 | A | G | 0.03 | -0.091 | 0.016 | 2.9E-08 |
| rs1731951   | 7 | 137075847 | A | T | 0.44 | -0.035 | 0.006 | 1.4E-08 |
| rs12666306  | 7 | 115082406 | A | G | 0.50 | 0.042  | 0.006 | 2.2E-12 |
| rs874168    | 8 | 30849450  | T | C | 0.53 | 0.034  | 0.006 | 7.9E-09 |
| rs871994    | 8 | 35190619  | A | C | 0.44 | 0.035  | 0.006 | 5.5E-09 |
| rs671985    | 8 | 60914783  | A | G | 0.45 | -0.038 | 0.006 | 2.8E-10 |
| rs4588900   | 8 | 73890425  | A | G | 0.52 | 0.033  | 0.006 | 1.6E-08 |
| rs28611339  | 8 | 10170037  | T | G | 0.13 | 0.058  | 0.009 | 8.5E-11 |
| rs28552587  | 8 | 103356226 | A | G | 0.56 | 0.033  | 0.006 | 3.3E-08 |
| rs2737240   | 8 | 116657235 | A | G | 0.71 | 0.036  | 0.007 | 3.4E-08 |
| rs17643634  | 8 | 91650818  | T | C | 0.17 | -0.060 | 0.008 | 1.3E-13 |
| rs10955647  | 8 | 114154187 | T | G | 0.53 | 0.033  | 0.006 | 1.8E-08 |
| rs77641763  | 9 | 140265782 | T | C | 0.12 | 0.071  | 0.009 | 6.5E-15 |

|             |    |           |   |   |      |        |       |         |
|-------------|----|-----------|---|---|------|--------|-------|---------|
| rs72773790  | 9  | 139109080 | T | C | 0.67 | 0.037  | 0.006 | 3.7E-09 |
| rs7044885   | 9  | 81739348  | C | G | 0.44 | -0.041 | 0.006 | 5.7E-12 |
| rs7040224   | 9  | 134886837 | A | G | 0.32 | 0.037  | 0.006 | 4.2E-09 |
| rs6597649   | 9  | 133786652 | T | C | 0.40 | 0.033  | 0.006 | 3.0E-08 |
| rs4090240   | 9  | 77118987  | T | C | 0.28 | -0.039 | 0.007 | 8.5E-09 |
| rs2792990   | 9  | 125621610 | C | G | 0.86 | 0.054  | 0.008 | 1.2E-10 |
| rs1927902   | 9  | 120518991 | T | C | 0.25 | 0.053  | 0.007 | 1.1E-14 |
| rs118166957 | 9  | 8858043   | T | C | 0.16 | 0.068  | 0.008 | 2.0E-16 |
| rs10761240  | 9  | 96361922  | A | G | 0.40 | -0.043 | 0.006 | 2.1E-12 |
| rs10758593  | 9  | 4292083   | A | G | 0.40 | -0.036 | 0.006 | 4.9E-09 |
| rs10756571  | 9  | 14534505  | T | C | 0.69 | 0.036  | 0.006 | 1.8E-08 |
| rs7475916   | 10 | 77771194  | C | G | 0.35 | -0.037 | 0.006 | 6.7E-09 |
| rs224029    | 10 | 64519299  | T | C | 0.40 | -0.039 | 0.006 | 2.5E-10 |
| rs12251016  | 10 | 21821918  | A | T | 0.66 | -0.039 | 0.006 | 3.9E-10 |
| rs11001276  | 10 | 76825638  | A | T | 0.74 | -0.038 | 0.007 | 2.5E-08 |
| rs10825503  | 10 | 57177470  | T | G | 0.49 | 0.033  | 0.006 | 1.4E-08 |
| rs72899452  | 11 | 45415577  | T | C | 0.06 | 0.074  | 0.012 | 1.0E-09 |
| rs667730    | 11 | 83277325  | T | C | 0.58 | 0.033  | 0.006 | 2.3E-08 |
| rs6589988   | 11 | 99126016  | A | G | 0.68 | -0.038 | 0.006 | 4.7E-09 |
| rs647905    | 11 | 121534938 | T | C | 0.54 | 0.033  | 0.006 | 2.9E-08 |
| rs566673    | 11 | 66401373  | T | G | 0.54 | -0.039 | 0.006 | 1.2E-10 |
| rs56133505  | 11 | 72348039  | A | G | 0.54 | 0.041  | 0.006 | 5.6E-12 |
| rs524859    | 11 | 66041079  | A | G | 0.36 | -0.044 | 0.006 | 1.5E-12 |
| rs4592425   | 11 | 62697813  | T | G | 0.70 | 0.040  | 0.006 | 4.3E-10 |
| rs2221119   | 11 | 88598444  | C | G | 0.44 | 0.036  | 0.006 | 2.0E-09 |
| rs214934    | 11 | 17193475  | A | T | 0.31 | -0.038 | 0.006 | 3.2E-09 |
| rs12790660  | 11 | 57667222  | T | C | 0.68 | -0.040 | 0.006 | 4.5E-10 |
| rs11605348  | 11 | 47606483  | A | G | 0.35 | -0.045 | 0.006 | 7.0E-13 |
| rs10898940  | 11 | 73455292  | A | C | 0.52 | 0.034  | 0.006 | 8.1E-09 |
| rs1064939   | 11 | 118396331 | A | T | 0.98 | 0.130  | 0.020 | 2.2E-10 |
| rs6606731   | 12 | 109982578 | A | T | 0.19 | 0.043  | 0.008 | 1.5E-08 |
| rs61921611  | 12 | 66367726  | T | C | 0.69 | -0.044 | 0.006 | 7.8E-12 |
| rs4767645   | 12 | 118385788 | T | G | 0.46 | -0.037 | 0.006 | 6.5E-10 |
| rs324017    | 12 | 57487814  | A | C | 0.29 | 0.039  | 0.007 | 1.6E-09 |
| rs28582096  | 12 | 123856998 | A | G | 0.21 | -0.054 | 0.007 | 1.7E-13 |
| rs2286729   | 12 | 6873818   | A | G | 0.09 | 0.070  | 0.011 | 5.4E-11 |
| rs12310246  | 12 | 84700945  | A | G | 0.25 | 0.045  | 0.007 | 4.7E-11 |
| rs1167132   | 12 | 43484487  | T | C | 0.39 | 0.035  | 0.006 | 8.7E-09 |
| rs9563886   | 13 | 61720066  | T | C | 0.61 | -0.034 | 0.006 | 3.1E-08 |
| rs9540729   | 13 | 66947124  | A | T | 0.48 | 0.036  | 0.006 | 1.4E-09 |

|            |    |           |   |   |      |        |       |         |
|------------|----|-----------|---|---|------|--------|-------|---------|
| rs9527083  | 13 | 53991125  | A | G | 0.67 | -0.076 | 0.006 | 1.6E-32 |
| rs7992992  | 13 | 54721699  | A | G | 0.13 | 0.051  | 0.009 | 1.2E-08 |
| rs6562066  | 13 | 60532796  | T | C | 0.37 | 0.039  | 0.006 | 1.4E-10 |
| rs2389631  | 13 | 96932868  | A | C | 0.67 | -0.040 | 0.006 | 2.0E-10 |
| rs1536053  | 13 | 111982291 | T | C | 0.32 | -0.038 | 0.006 | 6.0E-09 |
| rs11149313 | 13 | 85294881  | A | G | 0.73 | 0.040  | 0.007 | 2.4E-09 |
| rs1031654  | 13 | 54382035  | A | C | 0.80 | -0.051 | 0.007 | 3.9E-12 |
| rs4981170  | 14 | 33412996  | A | G | 0.19 | -0.054 | 0.008 | 7.3E-13 |
| rs7402939  | 15 | 99183876  | T | C | 0.38 | -0.036 | 0.006 | 5.2E-09 |
| rs7168238  | 15 | 66709386  | C | G | 0.07 | 0.064  | 0.011 | 1.8E-08 |
| rs715338   | 15 | 57215867  | A | G | 0.58 | 0.041  | 0.006 | 7.9E-12 |
| rs4702     | 15 | 91426560  | A | G | 0.56 | -0.048 | 0.006 | 6.8E-16 |
| rs176644   | 15 | 89913632  | T | G | 0.40 | 0.035  | 0.006 | 9.5E-09 |
| rs12917449 | 15 | 74331659  | A | C | 0.81 | -0.042 | 0.008 | 3.0E-08 |
| rs12912299 | 15 | 38897857  | T | C | 0.49 | -0.043 | 0.006 | 4.4E-13 |
| rs1038093  | 15 | 74012409  | T | C | 0.63 | 0.039  | 0.006 | 2.5E-10 |
| rs9931543  | 16 | 56128782  | T | C | 0.74 | 0.048  | 0.007 | 1.1E-12 |
| rs830716   | 16 | 12323509  | C | G | 0.71 | 0.045  | 0.007 | 8.7E-12 |
| rs66674044 | 16 | 19904344  | A | T | 0.86 | -0.060 | 0.009 | 2.2E-12 |
| rs4788203  | 16 | 29978827  | A | G | 0.43 | -0.035 | 0.006 | 6.3E-09 |
| rs4238755  | 16 | 52746089  | A | C | 0.26 | -0.043 | 0.007 | 2.3E-10 |
| rs3902952  | 16 | 61647589  | T | C | 0.19 | 0.048  | 0.008 | 2.5E-10 |
| rs35322724 | 16 | 77137324  | A | C | 0.58 | 0.049  | 0.006 | 3.8E-16 |
| rs34214423 | 16 | 52303107  | A | C | 0.81 | 0.045  | 0.008 | 3.2E-09 |
| rs3184470  | 16 | 715164    | A | G | 0.35 | -0.038 | 0.006 | 9.7E-10 |
| rs12924275 | 16 | 9191790   | T | C | 0.27 | 0.038  | 0.007 | 1.9E-08 |
| rs1015438  | 16 | 51177517  | A | G | 0.19 | 0.058  | 0.008 | 2.5E-14 |
| rs9889282  | 17 | 50259142  | A | C | 0.61 | -0.042 | 0.006 | 4.7E-12 |
| rs8076183  | 17 | 61024696  | T | C | 0.45 | -0.038 | 0.006 | 2.8E-10 |
| rs7214267  | 17 | 43157709  | A | G | 0.58 | -0.044 | 0.006 | 5.1E-13 |
| rs62068188 | 17 | 2400876   | T | C | 0.83 | 0.049  | 0.008 | 1.2E-09 |
| rs4643373  | 17 | 47123423  | T | C | 0.70 | 0.041  | 0.007 | 1.6E-10 |
| rs34490907 | 17 | 26933741  | C | G | 0.89 | 0.054  | 0.009 | 1.8E-08 |
| rs11650304 | 17 | 46035001  | C | G | 0.93 | 0.067  | 0.012 | 1.2E-08 |
| rs9964420  | 18 | 56824041  | A | C | 0.30 | 0.035  | 0.007 | 4.5E-08 |
| rs60565673 | 18 | 52906830  | T | G | 0.62 | -0.043 | 0.006 | 1.6E-12 |
| rs12605642 | 18 | 31313965  | T | G | 0.49 | 0.035  | 0.006 | 2.1E-09 |
| rs12454003 | 18 | 26315799  | C | G | 0.48 | -0.035 | 0.006 | 4.9E-09 |
| rs10502966 | 18 | 50748499  | A | G | 0.58 | -0.039 | 0.006 | 8.5E-11 |
| rs908668   | 19 | 56134038  | T | C | 0.21 | 0.050  | 0.007 | 1.4E-11 |

|            |    |          |   |   |      |        |       |         |
|------------|----|----------|---|---|------|--------|-------|---------|
| rs6510033  | 19 | 30710785 | A | G | 0.73 | -0.037 | 0.007 | 4.7E-08 |
| rs429358   | 19 | 45411941 | T | C | 0.85 | 0.046  | 0.008 | 2.1E-08 |
| rs12983032 | 19 | 5073447  | A | G | 0.34 | -0.043 | 0.006 | 1.1E-11 |
| rs910187   | 20 | 45841052 | A | G | 0.37 | -0.035 | 0.006 | 1.6E-08 |
| rs76145129 | 20 | 62670427 | T | G | 0.12 | -0.050 | 0.009 | 2.7E-08 |
| rs742760   | 20 | 50985290 | A | T | 0.82 | 0.043  | 0.008 | 2.5E-08 |
| rs6119267  | 20 | 31163914 | C | G | 0.69 | -0.060 | 0.006 | 2.3E-20 |
| rs6019663  | 20 | 47774512 | T | C | 0.29 | 0.040  | 0.007 | 6.5E-10 |
| rs2867690  | 20 | 41972028 | T | C | 0.18 | 0.042  | 0.008 | 3.7E-08 |
| rs2838787  | 21 | 46539725 | A | G | 0.39 | -0.036 | 0.006 | 7.7E-09 |
| rs11090039 | 22 | 41496800 | A | G | 0.29 | 0.039  | 0.007 | 1.8E-09 |

Note: SNP, single nucleotide polymorphism; Chr, chromosome; Pos, position; EA, effect allele; OA, other allele; EAF, effect allele frequency; Se, standard error.

Table S2. Genome-wide significant ( $p < 5 \times 10^{-8}$ ) single nucleotide polymorphisms that were used as instruments for sleep duration.

| SNP         | Chr | Pos       | EA | OA | EAF  | Beta  | Se    | <i>P</i> -value |
|-------------|-----|-----------|----|----|------|-------|-------|-----------------|
| rs915416    | 1   | 34731984  | C  | G  | 0.29 | 0.138 | 0.966 | 2.1E-12         |
| rs269054    | 1   | 57864304  | A  | T  | 0.42 | 0.126 | 0.666 | 1.5E-07         |
| rs61796569  | 1   | 66476437  | T  | C  | 0.27 | 0.144 | 0.828 | 4.5E-09         |
| rs12567114  | 1   | 98527951  | A  | G  | 0.28 | 0.138 | 0.846 | 2.1E-09         |
| rs7556815   | 2   | 114085785 | A  | G  | 0.22 | 0.150 | 2.352 | 1.8E-54         |
| rs12611523  | 2   | 139195328 | A  | G  | 0.55 | 0.126 | 0.702 | 2.6E-08         |
| rs4128364   | 2   | 147612734 | C  | T  | 0.34 | 0.132 | 0.780 | 3.9E-09         |
| rs4538155   | 2   | 157040773 | T  | C  | 0.65 | 0.132 | 0.762 | 5.8E-09         |
| rs11885663  | 2   | 166944004 | T  | C  | 0.25 | 0.144 | 0.864 | 3.5E-09         |
| rs10173260  | 2   | 210377845 | C  | T  | 0.61 | 0.126 | 0.618 | 1.6E-06         |
| rs374153    | 2   | 40382712  | C  | T  | 0.16 | 0.174 | 0.990 | 8.5E-09         |
| rs75539574  | 2   | 58871658  | C  | A  | 0.09 | 0.174 | 1.548 | 3.0E-19         |
| rs72804080  | 2   | 59358659  | G  | A  | 0.15 | 0.192 | 1.068 | 2.9E-08         |
| rs62120041  | 2   | 9185564   | T  | C  | 0.93 | 0.270 | 1.380 | 3.2E-07         |
| rs7644809   | 3   | 107564459 | T  | C  | 0.42 | 0.126 | 0.624 | 1.0E-06         |
| rs13088093  | 3   | 135838598 | G  | T  | 0.34 | 0.132 | 0.906 | 8.4E-12         |
| rs112230981 | 3   | 55879269  | A  | G  | 0.95 | 0.282 | 0.990 | 5.1E-04         |
| rs17732997  | 3   | 70470834  | C  | G  | 0.57 | 0.126 | 0.636 | 5.2E-07         |
| rs13109404  | 4   | 102896591 | T  | G  | 0.93 | 0.264 | 1.716 | 9.5E-11         |
| rs2192528   | 4   | 18327896  | A  | G  | 0.48 | 0.126 | 0.666 | 9.9E-08         |
| rs17427571  | 4   | 82254908  | A  | G  | 0.68 | 0.132 | 0.726 | 7.4E-08         |
| rs35531607  | 4   | 92533225  | C  | T  | 0.47 | 0.126 | 0.708 | 2.2E-08         |
| rs56372231  | 5   | 102321905 | T  | C  | 0.33 | 0.132 | 0.888 | 1.8E-11         |
| rs180769    | 5   | 135615615 | T  | C  | 0.43 | 0.126 | 0.678 | 1.1E-07         |
| rs365663    | 5   | 1428883   | A  | G  | 0.55 | 0.126 | 0.696 | 3.2E-08         |
| rs151014368 | 5   | 176751059 | A  | G  | 0.21 | 0.150 | 0.756 | 4.1E-07         |
| rs460692    | 5   | 3126584   | C  | T  | 0.14 | 0.204 | 1.206 | 3.2E-09         |
| rs34556183  | 6   | 28584775  | A  | G  | 0.72 | 0.150 | 0.990 | 2.5E-11         |
| rs80193650  | 6   | 33464363  | G  | A  | 0.16 | 0.180 | 0.774 | 2.3E-05         |
| rs113113059 | 6   | 43160375  | T  | C  | 0.78 | 0.156 | 0.828 | 8.5E-08         |
| rs9382445   | 6   | 54937974  | T  | C  | 0.62 | 0.132 | 0.846 | 6.3E-11         |
| rs2231265   | 6   | 89790201  | G  | A  | 0.77 | 0.150 | 0.930 | 4.3E-10         |
| rs9345234   | 6   | 93162639  | C  | A  | 0.58 | 0.126 | 0.714 | 2.1E-08         |
| rs2079070   | 7   | 114126432 | C  | G  | 0.27 | 0.154 | 1.053 | 7.5E-12         |
| rs7806045   | 7   | 132610266 | T  | C  | 0.76 | 0.144 | 0.894 | 1.1E-09         |
| rs34731055  | 7   | 2106928   | T  | C  | 0.18 | 0.162 | 1.044 | 1.1E-10         |
| rs73219758  | 8   | 14279446  | G  | A  | 0.71 | 0.138 | 0.906 | 4.6E-11         |



|            |    |           |   |   |      |       |        |         |
|------------|----|-----------|---|---|------|-------|--------|---------|
| rs330088   | 8  | 9149746   | C | T | 0.55 | 0.126 | -0.666 | 1.1E-07 |
| rs1776776  | 9  | 140497072 | T | C | 0.87 | 0.198 | 1.104  | 2.7E-08 |
| rs10973207 | 9  | 37100525  | T | G | 0.16 | 0.174 | 1.050  | 1.3E-09 |
| rs11190970 | 10 | 103128332 | G | A | 0.80 | 0.162 | 0.864  | 6.5E-08 |
| rs7915425  | 10 | 125016501 | T | C | 0.18 | 0.162 | 1.014  | 8.2E-10 |
| rs12246842 | 10 | 21830580  | A | G | 0.46 | 0.126 | 0.726  | 7.2E-09 |
| rs10761674 | 10 | 64618340  | C | T | 0.48 | 0.126 | 0.696  | 2.5E-08 |
| rs1939455  | 11 | 101520886 | G | T | 0.88 | 0.198 | 1.050  | 1.7E-07 |
| rs7115226  | 11 | 113408518 | A | C | 0.07 | 0.261 | 1.594  | 1.7E-09 |
| rs1263056  | 11 | 116576415 | A | G | 0.52 | 0.126 | 0.768  | 1.3E-09 |
| rs7951019  | 11 | 118358027 | G | T | 0.03 | 0.391 | 2.213  | 1.2E-08 |
| rs1057703  | 11 | 122830251 | G | T | 0.15 | 0.186 | 0.984  | 9.3E-08 |
| rs1517572  | 11 | 28829882  | C | A | 0.58 | 0.126 | 0.810  | 1.7E-10 |
| rs4592416  | 11 | 43800474  | G | A | 0.46 | 0.126 | 0.798  | 2.3E-10 |
| rs11602180 | 11 | 48162453  | C | T | 0.84 | 0.168 | 0.918  | 5.8E-08 |
| rs174560   | 11 | 61581764  | C | T | 0.31 | 0.138 | 0.792  | 5.8E-09 |
| rs12791153 | 11 | 80685181  | T | A | 0.08 | 0.234 | 1.320  | 2.6E-08 |
| rs1553132  | 11 | 88297740  | G | A | 0.26 | 0.144 | 0.852  | 5.1E-09 |
| rs4767550  | 12 | 117951150 | G | A | 0.41 | 0.126 | 0.822  | 1.1E-10 |
| rs34354917 | 12 | 38764559  | C | A | 0.71 | 0.138 | 0.666  | 1.8E-06 |
| rs6575005  | 14 | 26954078  | T | C | 0.76 | 0.144 | 0.858  | 4.3E-09 |
| rs10483350 | 14 | 29816155  | G | A | 0.20 | 0.156 | 0.858  | 6.4E-08 |
| rs61985058 | 14 | 60233841  | T | C | 0.14 | 0.180 | 0.936  | 2.1E-07 |
| rs55658675 | 14 | 65554638  | C | T | 0.65 | 0.132 | 0.720  | 4.9E-08 |
| rs11621908 | 14 | 78495761  | C | T | 0.92 | 0.228 | 1.266  | 3.4E-08 |
| rs8038326  | 15 | 47989799  | A | G | 0.73 | 0.138 | 0.906  | 1.2E-10 |
| rs11643715 | 16 | 23909538  | G | C | 0.29 | 0.144 | 0.660  | 5.6E-06 |
| rs9940646  | 16 | 53800629  | C | G | 0.58 | 0.137 | 1.017  | 1.2E-13 |
| rs8050478  | 16 | 56120461  | G | A | 0.50 | 0.126 | 0.948  | 3.4E-14 |
| rs3095508  | 16 | 6550400   | C | A | 0.59 | 0.126 | 0.702  | 3.4E-08 |
| rs205024   | 17 | 11227352  | T | C | 0.38 | 0.126 | 0.762  | 3.0E-09 |
| rs1991556  | 17 | 44083402  | G | A | 0.77 | 0.163 | 0.994  | 1.0E-09 |
| rs9903973  | 17 | 50571227  | C | T | 0.47 | 0.132 | 0.750  | 1.2E-08 |
| rs7503199  | 17 | 8134275   | C | T | 0.73 | 0.138 | 0.810  | 6.9E-09 |
| rs12607679 | 18 | 53059748  | T | C | 0.74 | 0.156 | 1.208  | 8.3E-15 |
| rs10421649 | 19 | 9942262   | A | T | 0.56 | 0.126 | 0.906  | 5.8E-13 |
| rs2072727  | 20 | 43538733  | T | C | 0.44 | 0.126 | 0.696  | 3.8E-08 |

Note: SNP, single nucleotide polymorphism; Chr, chromosome; Pos, position; EA, effect allele; OA, other allele; EAF, effect allele frequency; Se, standard error.

Table S3. Genome-wide significant ( $p < 5 \times 10^{-8}$ ) single nucleotide polymorphisms that were used as instruments for getting up.

| SNP         | Chr | Pos       | EA | OA | EAF  | Beta   | Se    | P-value |
|-------------|-----|-----------|----|----|------|--------|-------|---------|
| rs61773374  | 1   | 7858108   | G  | A  | 0.20 | 0.016  | 0.002 | 3.4E-14 |
| rs301806    | 1   | 8482078   | C  | T  | 0.42 | -0.010 | 0.002 | 4.7E-08 |
| rs77576965  | 1   | 15916734  | T  | C  | 0.27 | 0.011  | 0.002 | 1.9E-08 |
| rs12752290  | 1   | 21535330  | C  | T  | 0.44 | 0.012  | 0.002 | 1.0E-12 |
| rs113240734 | 1   | 77699071  | A  | G  | 0.16 | 0.019  | 0.002 | 2.2E-16 |
| rs75650221  | 1   | 174421994 | T  | C  | 0.04 | 0.039  | 0.005 | 3.9E-18 |
| rs4652514   | 1   | 180529542 | C  | T  | 0.30 | -0.011 | 0.002 | 9.9E-09 |
| rs12736689  | 1   | 182549729 | C  | T  | 0.03 | 0.052  | 0.005 | 1.7E-24 |
| rs76048411  | 2   | 4650079   | T  | C  | 0.48 | 0.011  | 0.002 | 8.5E-10 |
| rs2053457   | 2   | 44572164  | C  | T  | 0.25 | -0.016 | 0.002 | 1.3E-15 |
| rs10180284  | 2   | 50716016  | T  | C  | 0.48 | 0.014  | 0.002 | 4.9E-08 |
| rs4671328   | 2   | 58935282  | T  | G  | 0.45 | 0.011  | 0.002 | 1.1E-09 |
| rs10175975  | 2   | 59429807  | T  | C  | 0.18 | 0.013  | 0.002 | 3.3E-09 |
| rs13393656  | 2   | 70119255  | A  | C  | 0.24 | 0.011  | 0.002 | 2.1E-08 |
| rs406952    | 2   | 76307345  | C  | T  | 0.38 | 0.010  | 0.002 | 1.2E-08 |
| rs4853283   | 2   | 77156402  | G  | A  | 0.44 | -0.014 | 0.002 | 1.8E-16 |
| rs1606803   | 2   | 88933316  | T  | C  | 0.29 | 0.012  | 0.002 | 3.2E-10 |
| rs116298301 | 2   | 239177686 | T  | C  | 0.03 | -0.017 | 0.002 | 2.4E-11 |
| rs4483990   | 2   | 239423098 | C  | A  | 0.15 | -0.017 | 0.002 | 6.4E-13 |
| rs13116306  | 4   | 10727697  | T  | C  | 0.42 | -0.010 | 0.002 | 1.8E-08 |
| rs10470887  | 4   | 92567442  | G  | A  | 0.49 | -0.010 | 0.002 | 4.0E-08 |
| rs9995419   | 4   | 158607383 | A  | G  | 0.24 | 0.011  | 0.002 | 1.5E-08 |
| rs79751662  | 4   | 171014655 | C  | G  | 0.11 | -0.016 | 0.003 | 2.3E-08 |
| rs1459192   | 5   | 63944519  | T  | C  | 0.33 | -0.010 | 0.002 | 2.5E-08 |
| rs12515274  | 5   | 87655662  | A  | G  | 0.25 | -0.012 | 0.002 | 5.4E-10 |
| rs4958316   | 5   | 151942251 | A  | C  | 0.29 | 0.015  | 0.002 | 3.7E-15 |
| rs553108    | 6   | 31840455  | A  | G  | 0.42 | 0.010  | 0.002 | 3.1E-08 |
| rs2653349   | 6   | 55142337  | A  | G  | 0.21 | 0.023  | 0.002 | 8.5E-29 |
| rs9399613   | 6   | 147986024 | T  | C  | 0.29 | -0.011 | 0.002 | 1.3E-08 |
| rs3735478   | 7   | 44800176  | T  | G  | 0.29 | -0.011 | 0.002 | 1.6E-08 |
| rs2944822   | 7   | 71795592  | T  | C  | 0.45 | 0.010  | 0.002 | 4.4E-09 |
| rs16917522  | 8   | 53136442  | C  | T  | 0.18 | 0.014  | 0.002 | 1.1E-09 |
| rs72663537  | 8   | 76700618  | G  | T  | 0.13 | -0.014 | 0.003 | 2.8E-08 |
| rs77641763  | 9   | 140265782 | T  | C  | 0.12 | -0.018 | 0.003 | 2.0E-11 |
| rs4962716   | 10  | 126685867 | T  | C  | 0.13 | -0.016 | 0.003 | 1.8E-09 |
| rs11229264  | 11  | 57909086  | A  | G  | 0.30 | -0.012 | 0.002 | 1.4E-10 |
| rs7297799   | 12  | 34260142  | T  | C  | 0.40 | -0.013 | 0.002 | 1.2E-12 |

|            |    |           |   |   |      |        |       |         |
|------------|----|-----------|---|---|------|--------|-------|---------|
| rs2193749  | 12 | 46134812  | T | C | 0.49 | -0.010 | 0.002 | 1.8E-08 |
| rs6581138  | 12 | 57744864  | A | G | 0.24 | 0.013  | 0.002 | 2.3E-10 |
| rs1017168  | 12 | 107435405 | A | C | 0.36 | -0.010 | 0.002 | 2.6E-08 |
| rs74643199 | 12 | 116772891 | T | A | 0.15 | -0.014 | 0.002 | 1.2E-08 |
| rs4884166  | 13 | 55769145  | A | G | 0.20 | -0.012 | 0.002 | 1.2E-08 |
| rs7332608  | 13 | 77570677  | G | A | 0.03 | -0.031 | 0.005 | 4.6E-11 |
| rs6575012  | 14 | 89056699  | A | G | 0.48 | -0.010 | 0.002 | 2.6E-08 |
| rs3935182  | 15 | 78094807  | G | C | 0.42 | 0.012  | 0.002 | 6.8E-12 |
| rs1420607  | 16 | 49149191  | A | G | 0.27 | 0.013  | 0.002 | 1.6E-11 |
| rs11642015 | 16 | 53802494  | T | C | 0.40 | 0.011  | 0.002 | 6.2E-11 |
| rs1949072  | 16 | 56006108  | A | G | 0.43 | 0.010  | 0.002 | 2.5E-08 |
| rs17822102 | 16 | 60650143  | G | A | 0.34 | 0.011  | 0.002 | 9.4E-10 |
| rs11643192 | 16 | 72214276  | A | C | 0.39 | -0.011 | 0.002 | 1.3E-09 |
| rs4790352  | 17 | 2578550   | G | A | 0.08 | -0.018 | 0.003 | 8.8E-09 |
| rs3760185  | 17 | 17401736  | T | C | 0.24 | -0.011 | 0.002 | 4.5E-08 |
| rs7222039  | 17 | 38165541  | T | C | 0.45 | 0.010  | 0.002 | 3.4E-08 |
| rs12150229 | 17 | 44015446  | G | A | 0.22 | 0.012  | 0.002 | 3.5E-09 |
| rs77556405 | 17 | 46463909  | A | G | 0.17 | 0.017  | 0.002 | 1.6E-13 |
| rs12601968 | 17 | 50296459  | T | G | 0.33 | -0.011 | 0.002 | 1.2E-09 |
| rs4395148  | 18 | 31690668  | T | A | 0.31 | -0.010 | 0.002 | 2.4E-08 |
| rs8182491  | 19 | 42712024  | T | C | 0.10 | -0.017 | 0.003 | 1.2E-09 |
| rs3746601  | 20 | 30662805  | C | A | 0.36 | 0.010  | 0.002 | 2.9E-08 |
| rs11697690 | 20 | 31477981  | C | T | 0.47 | 0.010  | 0.002 | 2.3E-08 |
| rs74555583 | 20 | 51332268  | A | G | 0.09 | -0.017 | 0.003 | 3.0E-08 |

Note: SNP, single nucleotide polymorphism; Chr, chromosome; Pos, position; EA, effect allele;

OA, other allele; EAF, effect allele frequency; Se, standard error;getting up, The ease of getting up in the morning.

Table S4. Genome-wide significant ( $p < 5 \times 10^{-8}$ ) single nucleotide polymorphisms that were used as instruments for morningness.

| SNP         | Chr | Pos       | EA | OA | EAF  | Beta   | Se    | P-value |
|-------------|-----|-----------|----|----|------|--------|-------|---------|
| rs61773390  | 1   | 7884525   | T  | G  | 0.20 | 0.029  | 0.003 | 2.8E-27 |
| rs12065331  | 1   | 14507831  | T  | C  | 0.31 | -0.015 | 0.002 | 1.5E-10 |
| rs17448682  | 1   | 15966713  | T  | C  | 0.23 | 0.018  | 0.003 | 4.0E-13 |
| rs7543480   | 1   | 20014827  | T  | C  | 0.34 | 0.016  | 0.002 | 6.9E-13 |
| rs12140153  | 1   | 62579891  | T  | G  | 0.09 | -0.027 | 0.004 | 4.6E-12 |
| rs11208844  | 1   | 66851147  | A  | G  | 0.14 | -0.017 | 0.003 | 2.8E-08 |
| rs11162296  | 1   | 77700196  | C  | G  | 0.16 | 0.036  | 0.003 | 1.5E-34 |
| rs17416934  | 1   | 79874811  | T  | C  | 0.62 | 0.013  | 0.002 | 5.9E-09 |
| rs74802342  | 1   | 91078046  | A  | G  | 0.11 | -0.019 | 0.003 | 2.1E-08 |
| rs72720396  | 1   | 91191582  | A  | G  | 0.77 | -0.022 | 0.003 | 3.3E-18 |
| rs7522677   | 1   | 96470261  | T  | C  | 0.21 | 0.015  | 0.003 | 7.9E-09 |
| rs12139650  | 1   | 97598100  | T  | G  | 0.81 | 0.015  | 0.003 | 2.2E-08 |
| rs10494041  | 1   | 110031990 | C  | G  | 0.83 | 0.020  | 0.003 | 1.0E-12 |
| rs35461065  | 1   | 115060826 | T  | C  | 0.54 | -0.012 | 0.002 | 8.4E-09 |
| rs2794682   | 1   | 150320847 | T  | C  | 0.40 | 0.021  | 0.002 | 3.9E-22 |
| rs75650221  | 1   | 174421994 | T  | C  | 0.04 | 0.034  | 0.006 | 8.9E-10 |
| rs13306728  | 1   | 179312559 | A  | G  | 0.92 | 0.030  | 0.004 | 6.2E-14 |
| rs509476    | 1   | 182573227 | T  | C  | 0.03 | 0.099  | 0.006 | 7.4E-56 |
| rs12746073  | 1   | 183679912 | T  | C  | 0.53 | 0.012  | 0.002 | 1.7E-08 |
| rs12025393  | 1   | 193341118 | A  | G  | 0.27 | -0.014 | 0.002 | 1.8E-08 |
| rs16839841  | 1   | 196353384 | T  | G  | 0.92 | 0.022  | 0.004 | 2.7E-08 |
| rs13011556  | 2   | 4651923   | C  | G  | 0.76 | -0.016 | 0.003 | 7.7E-11 |
| rs2712056   | 2   | 23959131  | T  | C  | 0.18 | 0.018  | 0.003 | 1.6E-10 |
| rs848552    | 2   | 36700580  | C  | G  | 0.47 | -0.013 | 0.002 | 1.1E-09 |
| rs62135536  | 2   | 44326028  | T  | C  | 0.03 | 0.035  | 0.006 | 1.4E-08 |
| rs2592199   | 2   | 44710169  | C  | G  | 0.77 | 0.022  | 0.003 | 1.4E-14 |
| rs10495976  | 2   | 49750698  | A  | T  | 0.61 | -0.017 | 0.002 | 1.0E-13 |
| rs1520524   | 2   | 50525628  | T  | C  | 0.10 | 0.025  | 0.004 | 2.7E-12 |
| rs10193431  | 2   | 53725767  | T  | C  | 0.53 | 0.013  | 0.002 | 4.4E-09 |
| rs17049270  | 2   | 58192905  | T  | C  | 0.10 | -0.020 | 0.004 | 2.0E-08 |
| rs10175975  | 2   | 59429807  | T  | C  | 0.18 | 0.018  | 0.003 | 1.9E-10 |
| rs4672440   | 2   | 61616653  | T  | G  | 0.35 | 0.016  | 0.002 | 5.1E-13 |
| rs113851554 | 2   | 66750564  | T  | G  | 0.05 | -0.028 | 0.005 | 1.3E-08 |
| rs2706762   | 2   | 70488470  | T  | C  | 0.15 | -0.019 | 0.003 | 3.0E-10 |
| rs7586062   | 2   | 77305160  | C  | G  | 0.47 | -0.022 | 0.002 | 3.1E-24 |
| rs10190053  | 2   | 77916762  | A  | C  | 0.37 | -0.013 | 0.002 | 6.5E-09 |
| rs75863239  | 2   | 105312975 | T  | C  | 0.91 | -0.023 | 0.004 | 3.2E-08 |

|             |   |           |   |   |      |        |       |         |
|-------------|---|-----------|---|---|------|--------|-------|---------|
| rs62172117  | 2 | 144168667 | A | G | 0.36 | -0.019 | 0.002 | 1.4E-17 |
| rs7579662   | 2 | 161915810 | A | G | 0.39 | -0.012 | 0.002 | 2.2E-08 |
| rs13004345  | 2 | 174037347 | T | C | 0.65 | -0.012 | 0.002 | 3.8E-08 |
| rs11677484  | 2 | 191578172 | T | G | 0.25 | 0.015  | 0.002 | 6.2E-10 |
| rs4850712   | 2 | 197301425 | T | G | 0.32 | 0.013  | 0.002 | 9.4E-09 |
| rs6716898   | 2 | 198944271 | A | G | 0.48 | 0.021  | 0.002 | 2.3E-22 |
| rs184033703 | 2 | 206956138 | A | G | 0.06 | 0.032  | 0.005 | 9.6E-10 |
| rs35333999  | 2 | 239161957 | T | C | 0.04 | -0.047 | 0.005 | 5.1E-19 |
| rs77942338  | 2 | 239194693 | T | C | 0.97 | -0.056 | 0.007 | 1.4E-16 |
| rs11900963  | 2 | 239308049 | A | T | 0.91 | 0.045  | 0.004 | 3.2E-32 |
| rs62182135  | 2 | 240267305 | A | C | 0.33 | -0.013 | 0.002 | 7.8E-09 |
| rs17786957  | 3 | 2550093   | C | G | 0.16 | -0.018 | 0.003 | 6.1E-10 |
| rs7428484   | 3 | 23330101  | A | G | 0.67 | 0.013  | 0.002 | 2.0E-08 |
| rs62263597  | 3 | 50131691  | A | G | 0.08 | 0.028  | 0.004 | 4.8E-13 |
| rs7652260   | 3 | 50571585  | C | G | 0.84 | 0.017  | 0.003 | 2.0E-08 |
| rs67000219  | 3 | 71557581  | T | C | 0.11 | -0.019 | 0.003 | 2.7E-08 |
| rs9876864   | 3 | 77208521  | A | T | 0.41 | 0.016  | 0.002 | 9.2E-14 |
| rs55753638  | 3 | 85644482  | T | C | 0.88 | -0.022 | 0.003 | 2.9E-11 |
| rs1800828   | 3 | 113891549 | C | G | 0.75 | 0.014  | 0.002 | 5.3E-09 |
| rs6799356   | 3 | 123148362 | A | C | 0.75 | 0.014  | 0.003 | 4.1E-08 |
| rs2699869   | 3 | 133032892 | A | C | 0.45 | 0.013  | 0.002 | 5.1E-09 |
| rs1109088   | 3 | 138154795 | A | G | 0.57 | 0.013  | 0.002 | 2.6E-09 |
| rs6769642   | 3 | 160763469 | A | C | 0.48 | 0.016  | 0.002 | 2.8E-13 |
| rs3850174   | 3 | 172364093 | A | T | 0.25 | -0.014 | 0.002 | 9.1E-09 |
| rs6443788   | 3 | 181966190 | A | C | 0.29 | -0.015 | 0.002 | 1.0E-09 |
| rs6443810   | 3 | 182262672 | C | G | 0.69 | 0.015  | 0.002 | 2.5E-10 |
| rs6778003   | 3 | 185991970 | T | G | 0.29 | 0.016  | 0.002 | 4.9E-12 |
| rs7617588   | 3 | 186079990 | T | C | 0.86 | -0.021 | 0.003 | 3.5E-11 |
| rs9683585   | 4 | 2702804   | C | G | 0.56 | -0.012 | 0.002 | 1.8E-08 |
| rs56040212  | 4 | 16435084  | A | G | 0.24 | -0.014 | 0.003 | 2.2E-08 |
| rs28634184  | 4 | 62873419  | T | C | 0.25 | -0.014 | 0.002 | 2.3E-08 |
| rs57180764  | 4 | 83239773  | A | G | 0.77 | 0.017  | 0.003 | 3.2E-11 |
| rs4241964   | 4 | 137053959 | T | G | 0.52 | -0.015 | 0.002 | 3.5E-12 |
| rs3797051   | 5 | 63860141  | T | C | 0.76 | 0.015  | 0.003 | 1.5E-09 |
| rs12657776  | 5 | 87661593  | A | G | 0.75 | 0.019  | 0.002 | 3.5E-14 |
| rs304137    | 5 | 88169652  | A | G | 0.52 | 0.016  | 0.002 | 3.1E-14 |
| rs286808    | 5 | 107459376 | T | C | 0.47 | 0.013  | 0.002 | 3.9E-09 |
| rs2910032   | 5 | 152540354 | T | C | 0.52 | 0.019  | 0.002 | 6.2E-18 |
| rs42210     | 5 | 166408788 | C | G | 0.71 | -0.014 | 0.002 | 3.5E-09 |
| rs335433    | 5 | 176867207 | T | C | 0.46 | -0.013 | 0.002 | 2.3E-09 |

|             |   |           |   |   |      |        |       |         |
|-------------|---|-----------|---|---|------|--------|-------|---------|
| rs9395520   | 6 | 13183523  | T | C | 0.30 | 0.020  | 0.002 | 1.6E-18 |
| rs9295795   | 6 | 29145623  | T | C | 0.94 | -0.026 | 0.005 | 1.9E-08 |
| rs486416    | 6 | 31856070  | A | G | 0.64 | -0.013 | 0.002 | 6.1E-09 |
| rs734597    | 6 | 50836279  | A | G | 0.17 | 0.016  | 0.003 | 1.6E-08 |
| rs2653349   | 6 | 55142337  | A | G | 0.21 | 0.031  | 0.003 | 1.0E-32 |
| rs2881955   | 6 | 72479263  | T | C | 0.28 | 0.016  | 0.002 | 5.6E-11 |
| rs9375352   | 6 | 98739938  | A | T | 0.27 | 0.014  | 0.002 | 2.0E-08 |
| rs4557564   | 6 | 110232051 | A | G | 0.93 | 0.025  | 0.004 | 2.1E-09 |
| rs6935086   | 6 | 128944677 | T | C | 0.89 | 0.020  | 0.003 | 5.9E-09 |
| rs9479402   | 6 | 153135339 | T | C | 0.99 | -0.102 | 0.01  | 1.3E-22 |
| rs9348050   | 6 | 166263488 | T | C | 0.49 | 0.013  | 0.002 | 2.0E-09 |
| rs16873715  | 7 | 8560454   | A | T | 0.76 | -0.015 | 0.003 | 4.4E-08 |
| rs56382918  | 7 | 24067993  | T | C | 0.74 | 0.018  | 0.002 | 1.1E-12 |
| rs10236197  | 7 | 32291761  | T | C | 0.63 | 0.014  | 0.002 | 2.0E-10 |
| rs56049037  | 7 | 32947201  | A | G | 0.29 | -0.017 | 0.002 | 2.3E-12 |
| rs4245555   | 7 | 50661409  | T | C | 0.59 | -0.018 | 0.002 | 2.0E-15 |
| rs2138759   | 7 | 71823436  | A | G | 0.30 | 0.014  | 0.002 | 1.7E-09 |
| rs2922966   | 7 | 96455598  | A | G | 0.84 | 0.025  | 0.003 | 1.1E-17 |
| rs202157    | 7 | 101637753 | T | C | 0.70 | -0.018 | 0.002 | 1.2E-14 |
| rs112613078 | 7 | 102433678 | A | G | 0.81 | -0.025 | 0.003 | 1.5E-20 |
| rs10262462  | 7 | 114180062 | A | G | 0.40 | -0.015 | 0.002 | 3.2E-12 |
| rs6978514   | 7 | 115684409 | T | C | 0.56 | -0.013 | 0.002 | 4.9E-08 |
| rs2971970   | 7 | 133643778 | T | G | 0.22 | 0.017  | 0.003 | 2.2E-11 |
| rs35748596  | 8 | 4825443   | T | G | 0.64 | -0.016 | 0.002 | 2.4E-12 |
| rs34344642  | 8 | 31765586  | T | G | 0.08 | -0.024 | 0.004 | 2.9E-09 |
| rs12541362  | 8 | 33584661  | A | T | 0.65 | -0.018 | 0.002 | 5.6E-15 |
| rs1919346   | 8 | 35211457  | A | G | 0.53 | 0.012  | 0.002 | 1.3E-08 |
| rs11988076  | 8 | 53128629  | A | G | 0.84 | -0.019 | 0.003 | 1.8E-11 |
| rs6472936   | 8 | 76639759  | T | C | 0.78 | 0.018  | 0.003 | 5.2E-12 |
| rs1110275   | 8 | 86854332  | T | C | 0.91 | 0.020  | 0.004 | 4.1E-08 |
| rs34578339  | 8 | 89440842  | A | T | 0.84 | -0.016 | 0.003 | 2.8E-08 |
| rs72673588  | 8 | 93356390  | C | G | 0.82 | -0.017 | 0.003 | 1.3E-09 |
| rs3100052   | 8 | 101967139 | A | G | 0.39 | 0.013  | 0.002 | 1.3E-08 |
| rs2737245   | 8 | 116658583 | T | G | 0.28 | 0.018  | 0.002 | 2.9E-14 |
| rs1323591   | 9 | 8456020   | T | C | 0.32 | -0.016 | 0.002 | 2.1E-12 |
| rs2291589   | 9 | 37079661  | T | G | 0.62 | 0.018  | 0.002 | 1.7E-16 |
| rs77598468  | 9 | 76484268  | A | C | 0.03 | -0.042 | 0.006 | 1.1E-12 |
| rs4565536   | 9 | 85189088  | A | C | 0.50 | -0.012 | 0.002 | 5.0E-08 |
| rs10797119  | 9 | 92202495  | T | C | 0.46 | -0.013 | 0.002 | 2.8E-09 |
| rs28365587  | 9 | 131959615 | A | G | 0.51 | -0.013 | 0.002 | 3.6E-09 |

|            |    |           |   |   |      |        |       |         |
|------------|----|-----------|---|---|------|--------|-------|---------|
| rs10448340 | 9  | 139320069 | T | G | 0.68 | -0.013 | 0.002 | 9.1E-09 |
| rs28458909 | 9  | 140257189 | T | C | 0.12 | -0.030 | 0.004 | 1.9E-16 |
| rs1750785  | 10 | 776150    | A | G | 0.26 | 0.014  | 0.002 | 3.5E-09 |
| rs9416744  | 10 | 60567937  | A | C | 0.26 | 0.017  | 0.002 | 1.5E-12 |
| rs7910164  | 10 | 72852735  | A | G | 0.64 | 0.012  | 0.002 | 4.8E-08 |
| rs76518095 | 10 | 131149976 | T | C | 0.08 | 0.023  | 0.004 | 1.0E-08 |
| rs9795439  | 11 | 1483543   | A | G | 0.20 | 0.018  | 0.003 | 6.7E-09 |
| rs925947   | 11 | 27667367  | T | G | 0.20 | 0.016  | 0.003 | 9.6E-10 |
| rs12799529 | 11 | 30408552  | T | C | 0.76 | 0.018  | 0.003 | 5.1E-13 |
| rs11032362 | 11 | 33759092  | A | G | 0.09 | 0.031  | 0.004 | 3.5E-17 |
| rs34239319 | 11 | 43902681  | T | G | 0.10 | 0.024  | 0.004 | 6.5E-12 |
| rs11039308 | 11 | 47622412  | A | G | 0.41 | 0.014  | 0.002 | 4.9E-11 |
| rs3168135  | 11 | 58386177  | A | G | 0.24 | -0.017 | 0.003 | 3.6E-12 |
| rs4008953  | 11 | 66660949  | A | G | 0.71 | -0.016 | 0.002 | 3.2E-11 |
| rs4237555  | 11 | 92725803  | T | C | 0.53 | 0.012  | 0.002 | 4.2E-08 |
| rs4936290  | 11 | 114009255 | A | C | 0.65 | -0.013 | 0.002 | 1.2E-08 |
| rs577924   | 11 | 122135107 | T | C | 0.53 | 0.012  | 0.002 | 2.1E-08 |
| rs1174510  | 12 | 17093317  | A | G | 0.62 | 0.012  | 0.002 | 4.9E-08 |
| rs11611435 | 12 | 24089322  | T | C | 0.55 | 0.012  | 0.002 | 4.0E-08 |
| rs7313852  | 12 | 38908389  | A | G | 0.44 | -0.025 | 0.002 | 1.0E-29 |
| rs11183201 | 12 | 46170982  | T | C | 0.49 | -0.017 | 0.002 | 1.6E-14 |
| rs671255   | 12 | 52189566  | A | G | 0.75 | -0.014 | 0.002 | 1.4E-08 |
| rs7299922  | 12 | 54702519  | A | G | 0.63 | 0.013  | 0.002 | 8.6E-09 |
| rs7138306  | 12 | 63634487  | A | G | 0.47 | 0.013  | 0.002 | 8.9E-10 |
| rs7488974  | 12 | 90442001  | A | G | 0.40 | 0.016  | 0.002 | 1.8E-13 |
| rs10861694 | 12 | 107405922 | T | C | 0.56 | 0.014  | 0.002 | 2.6E-10 |
| rs4102203  | 12 | 120976371 | T | C | 0.89 | 0.024  | 0.003 | 7.8E-12 |
| rs61963123 | 13 | 42512639  | T | C | 0.78 | 0.017  | 0.003 | 2.3E-10 |
| rs9597250  | 13 | 56303709  | A | C | 0.19 | -0.019 | 0.003 | 2.9E-12 |
| rs2593487  | 13 | 69903058  | A | G | 0.34 | -0.014 | 0.002 | 2.9E-10 |
| rs9565309  | 13 | 77577027  | T | C | 0.97 | 0.066  | 0.006 | 1.3E-28 |
| rs7337911  | 13 | 94111843  | A | G | 0.75 | 0.015  | 0.002 | 1.0E-09 |
| rs9521184  | 13 | 109782568 | T | C | 0.49 | 0.013  | 0.002 | 8.3E-10 |
| rs56376592 | 14 | 57378912  | A | C | 0.82 | 0.017  | 0.003 | 1.4E-09 |
| rs4899502  | 14 | 74669893  | A | G | 0.69 | -0.016 | 0.002 | 1.6E-11 |
| rs12432176 | 14 | 101021218 | A | C | 0.38 | 0.013  | 0.002 | 1.5E-08 |
| rs2701524  | 15 | 37383688  | T | C | 0.59 | 0.013  | 0.002 | 5.4E-09 |
| rs59986227 | 15 | 48009263  | C | G | 0.75 | -0.015 | 0.002 | 5.4E-09 |
| rs12442008 | 15 | 53725112  | T | C | 0.25 | 0.014  | 0.002 | 3.4E-08 |
| rs11852820 | 15 | 101150435 | C | G | 0.66 | -0.014 | 0.002 | 5.8E-10 |

|             |    |          |   |   |      |        |       |         |
|-------------|----|----------|---|---|------|--------|-------|---------|
| rs2304467   | 16 | 8988777  | C | G | 0.60 | -0.012 | 0.002 | 3.9E-08 |
| rs7196720   | 16 | 24534662 | T | C | 0.49 | 0.013  | 0.002 | 4.3E-09 |
| rs12927162  | 16 | 52684916 | A | G | 0.72 | 0.028  | 0.002 | 2.1E-32 |
| rs1421085   | 16 | 53800954 | T | C | 0.60 | -0.023 | 0.002 | 1.4E-25 |
| rs2398144   | 16 | 56352854 | A | C | 0.39 | -0.021 | 0.002 | 2.4E-21 |
| rs8044054   | 16 | 60628436 | T | C | 0.39 | 0.015  | 0.002 | 3.9E-12 |
| rs17604349  | 16 | 72210865 | A | G | 0.18 | -0.022 | 0.003 | 1.2E-15 |
| rs2518022   | 17 | 8057367  | T | C | 0.09 | 0.032  | 0.004 | 1.5E-16 |
| rs2232839   | 17 | 17399635 | T | C | 0.21 | -0.025 | 0.003 | 2.4E-21 |
| rs9915731   | 17 | 30599555 | A | T | 0.27 | -0.013 | 0.002 | 2.8E-08 |
| rs225289    | 17 | 33928945 | T | C | 0.17 | 0.016  | 0.003 | 1.2E-08 |
| rs72828815  | 17 | 42994794 | T | C | 0.18 | 0.016  | 0.003 | 6.1E-09 |
| rs117974417 | 17 | 46156510 | C | G | 0.85 | -0.018 | 0.003 | 1.5E-09 |
| rs6504758   | 17 | 50208366 | A | G | 0.46 | -0.014 | 0.002 | 9.8E-11 |
| rs9898091   | 17 | 54173599 | T | C | 0.96 | 0.038  | 0.006 | 6.9E-12 |
| rs8072058   | 17 | 55734198 | A | T | 0.78 | -0.015 | 0.003 | 1.4E-08 |
| rs17682747  | 17 | 61181112 | A | G | 0.23 | 0.014  | 0.003 | 4.7E-08 |
| rs2916142   | 17 | 65482064 | T | C | 0.46 | 0.015  | 0.002 | 7.6E-12 |
| rs10491171  | 17 | 68414995 | C | G | 0.87 | 0.019  | 0.003 | 3.6E-09 |
| rs487952    | 17 | 74898300 | A | G | 0.57 | 0.013  | 0.002 | 4.4E-09 |
| rs974552    | 18 | 5186164  | A | G | 0.81 | -0.022 | 0.003 | 1.4E-15 |
| rs1013987   | 18 | 22630836 | T | C | 0.40 | -0.015 | 0.002 | 1.4E-11 |
| rs4239386   | 18 | 31664710 | A | T | 0.33 | -0.019 | 0.002 | 2.1E-17 |
| rs12969848  | 18 | 38152835 | T | C | 0.53 | 0.017  | 0.002 | 1.5E-15 |
| rs989885    | 18 | 38464855 | A | G | 0.94 | -0.024 | 0.004 | 3.8E-08 |
| rs9956387   | 18 | 44773382 | A | T | 0.50 | -0.014 | 0.002 | 1.4E-10 |
| rs17596722  | 18 | 53154167 | T | C | 0.20 | -0.018 | 0.003 | 3.2E-11 |
| rs9964420   | 18 | 56824041 | A | C | 0.30 | -0.022 | 0.002 | 4.0E-21 |
| rs11152350  | 18 | 60240352 | A | C | 0.47 | -0.015 | 0.002 | 1.1E-12 |
| rs9958145   | 18 | 64363800 | A | G | 0.20 | -0.015 | 0.003 | 4.3E-08 |
| rs10402849  | 19 | 2695661  | T | C | 0.20 | 0.016  | 0.003 | 6.7E-09 |
| rs3843751   | 19 | 10748121 | T | C | 0.66 | 0.013  | 0.002 | 6.3E-09 |
| rs9636202   | 19 | 18449238 | A | G | 0.27 | -0.013 | 0.002 | 3.5E-08 |
| rs12481462  | 20 | 14728972 | T | C | 0.37 | 0.012  | 0.002 | 4.4E-08 |
| rs78095690  | 20 | 16239683 | T | C | 0.56 | -0.013 | 0.002 | 5.8E-09 |
| rs6131942   | 20 | 17348608 | A | G | 0.42 | -0.015 | 0.002 | 7.6E-12 |
| rs1737893   | 20 | 31051699 | T | C | 0.38 | -0.014 | 0.002 | 1.4E-09 |
| rs2072727   | 20 | 43538733 | T | C | 0.44 | 0.012  | 0.002 | 3.5E-08 |
| rs695459    | 22 | 28848278 | T | C | 0.39 | -0.013 | 0.002 | 6.6E-09 |
| rs28580373  | 22 | 35847288 | A | G | 0.23 | 0.014  | 0.003 | 3.3E-08 |



|            |    |          |   |   |      |        |       |         |
|------------|----|----------|---|---|------|--------|-------|---------|
| rs11705370 | 22 | 40555993 | A | T | 0.60 | -0.019 | 0.002 | 3.4E-15 |
| rs4822107  | 22 | 42704834 | A | G | 0.51 | 0.012  | 0.002 | 2.2E-08 |
| rs2294203  | 22 | 45738487 | A | G | 0.68 | 0.013  | 0.002 | 3.0E-08 |

Note: SNP, single nucleotide polymorphism; Chr, chromosome; Pos, position; EA, effect allele;

OA, other allele; EAF, effect allele frequency; Se, standard error.

Table S5. Genome-wide significant ( $p < 5 \times 10^{-8}$ ) single nucleotide polymorphisms that were used as instruments for snoring.

| SNP        | Chr | Pos       | EA | OA | EAF  | Beta  | Se    | P-value |
|------------|-----|-----------|----|----|------|-------|-------|---------|
| rs35915391 | 1   | 87781737  | C  | G  | 0.35 | 0.971 | 0.005 | 2.2E-05 |
| rs35562935 | 1   | 96689205  | A  | G  | 0.07 | 1.055 | 0.009 | 1.7E-05 |
| rs72906130 | 2   | 157076893 | G  | C  | 0.13 | 1.057 | 0.007 | 3.5E-14 |
| rs9309771  | 3   | 77593064  | A  | G  | 0.45 | 1.030 | 0.005 | 5.7E-09 |
| rs34811474 | 4   | 25408838  | A  | G  | 0.23 | 0.962 | 0.006 | 4.2E-08 |
| rs6855873  | 4   | 42539270  | T  | C  | 0.24 | 1.033 | 0.006 | 2.1E-05 |
| rs2307111  | 5   | 75003678  | C  | T  | 0.39 | 0.966 | 0.005 | 1.3E-08 |
| rs10062026 | 5   | 90052289  | A  | G  | 0.36 | 0.971 | 0.005 | 2.1E-05 |
| rs947612   | 6   | 73738661  | G  | A  | 0.25 | 1.034 | 0.006 | 9.9E-06 |
| rs17060460 | 6   | 100827834 | G  | A  | 0.23 | 1.034 | 0.006 | 1.4E-08 |
| rs9389081  | 6   | 133815465 | A  | T  | 0.08 | 0.950 | 0.009 | 4.4E-08 |
| rs2981329  | 8   | 34985791  | C  | T  | 0.26 | 1.034 | 0.006 | 7.7E-09 |
| rs7007887  | 8   | 71555913  | T  | C  | 0.43 | 1.038 | 0.005 | 9.9E-14 |
| rs4523230  | 8   | 78234143  | A  | T  | 0.28 | 0.967 | 0.006 | 1.7E-09 |
| rs1016013  | 9   | 97476484  | A  | G  | 0.40 | 0.969 | 0.005 | 7.2E-10 |
| rs11256034 | 10  | 9086147   | T  | C  | 0.25 | 1.039 | 0.006 | 4.7E-11 |
| rs2049045  | 11  | 27694241  | C  | G  | 0.19 | 0.959 | 0.006 | 8.9E-11 |
| rs10878269 | 12  | 65791463  | T  | C  | 0.36 | 1.038 | 0.005 | 3.8E-13 |
| rs12427782 | 13  | 40745813  | T  | G  | 0.49 | 0.971 | 0.005 | 5.8E-09 |
| rs2762049  | 13  | 50822363  | C  | G  | 0.39 | 1.035 | 0.005 | 8.7E-09 |
| rs592333   | 13  | 51340315  | G  | A  | 0.44 | 1.042 | 0.005 | 1.1E-13 |
| rs2664299  | 14  | 99742187  | C  | T  | 0.42 | 0.967 | 0.005 | 4.5E-08 |
| rs9933881  | 16  | 1740691   | C  | T  | 0.07 | 1.056 | 0.009 | 8.9E-09 |
| rs732172   | 16  | 31050033  | T  | C  | 0.37 | 1.032 | 0.005 | 1.3E-09 |
| rs8047587  | 16  | 53798622  | T  | G  | 0.44 | 1.031 | 0.005 | 2.1E-09 |
| rs12449843 | 17  | 2058207   | A  | G  | 0.38 | 0.968 | 0.005 | 4.4E-10 |
| rs1641511  | 17  | 7559677   | G  | A  | 0.24 | 1.034 | 0.006 | 1.4E-08 |
| rs57222984 | 17  | 43758898  | G  | A  | 0.24 | 1.039 | 0.006 | 3.0E-11 |
| rs2924251  | 17  | 46338677  | A  | G  | 0.33 | 1.031 | 0.005 | 5.2E-09 |
| rs180107   | 17  | 67930772  | A  | T  | 0.41 | 0.971 | 0.005 | 3.9E-09 |
| rs4987719  | 18  | 60960310  | T  | C  | 0.03 | 1.078 | 0.014 | 3.6E-08 |
| rs10415992 | 19  | 32181118  | G  | C  | 0.09 | 0.952 | 0.009 | 8.1E-09 |
| rs34107769 | 20  | 46306828  | C  | T  | 0.29 | 0.969 | 0.005 | 9.9E-09 |
| rs6099273  | 20  | 55347828  | T  | C  | 0.25 | 1.033 | 0.006 | 1.2E-08 |

Note: SNP, single nucleotide polymorphism; Chr, chromosome; Pos, position; EA, effect allele; OA, other allele; EAF, effect allele frequency; Se, standard error.

TableS6. Genetic data for sleep traits and CAD in patients with diabetes.

| Exposure | SNP        | EA | OA | Exposure |      |         | Outcome |      |         |
|----------|------------|----|----|----------|------|---------|---------|------|---------|
|          |            |    |    | Beta     | Se   | P-value | Beta    | Se   | P-value |
| insomnia | rs9964420  | A  | C  | 0.04     | 0.01 | 4.5E-08 | -0.01   | 0.03 | 7.5E-01 |
| insomnia | rs9931543  | T  | C  | 0.05     | 0.01 | 1.1E-12 | -0.04   | 0.03 | 2.0E-01 |
| insomnia | rs9889282  | A  | C  | -0.04    | 0.01 | 4.7E-12 | 0.00    | 0.03 | 8.8E-01 |
| insomnia | rs9563886  | T  | C  | -0.03    | 0.01 | 3.1E-08 | -0.04   | 0.03 | 1.5E-01 |
| insomnia | rs9540729  | A  | T  | 0.04     | 0.01 | 1.4E-09 | 0.01    | 0.03 | 7.7E-01 |
| insomnia | rs9527083  | A  | G  | -0.08    | 0.01 | 1.6E-32 | -0.10   | 0.03 | 2.7E-04 |
| insomnia | rs9394502  | T  | C  | -0.05    | 0.01 | 7.8E-18 | 0.00    | 0.03 | 9.7E-01 |
| insomnia | rs9373590  | A  | T  | 0.04     | 0.01 | 2.2E-11 | 0.01    | 0.03 | 6.1E-01 |
| insomnia | rs910187   | A  | G  | -0.03    | 0.01 | 1.6E-08 | -0.03   | 0.03 | 2.6E-01 |
| insomnia | rs908668   | T  | C  | 0.05     | 0.01 | 1.4E-11 | 0.04    | 0.03 | 2.3E-01 |
| insomnia | rs874168   | T  | C  | 0.03     | 0.01 | 7.9E-09 | 0.00    | 0.03 | 9.0E-01 |
| insomnia | rs871994   | A  | C  | 0.04     | 0.01 | 5.5E-09 | 0.00    | 0.03 | 8.9E-01 |
| insomnia | rs830716   | C  | G  | 0.04     | 0.01 | 8.7E-12 | 0.03    | 0.03 | 3.1E-01 |
| insomnia | rs823247   | T  | C  | -0.04    | 0.01 | 5.2E-10 | -0.01   | 0.03 | 6.1E-01 |
| insomnia | rs8180817  | C  | G  | -0.05    | 0.01 | 1.8E-16 | -0.06   | 0.03 | 3.8E-02 |
| insomnia | rs8180457  | T  | C  | -0.06    | 0.01 | 1.1E-11 | 0.03    | 0.04 | 3.7E-01 |
| insomnia | rs8076183  | T  | C  | -0.04    | 0.01 | 2.8E-10 | -0.01   | 0.03 | 6.7E-01 |
| insomnia | rs7992992  | A  | G  | 0.05     | 0.01 | 1.2E-08 | 0.01    | 0.04 | 7.6E-01 |
| insomnia | rs77641763 | T  | C  | 0.07     | 0.01 | 6.5E-15 | 0.02    | 0.04 | 6.2E-01 |
| insomnia | rs7625896  | A  | G  | 0.04     | 0.01 | 5.3E-09 | -0.01   | 0.03 | 7.7E-01 |
| insomnia | rs7615602  | C  | G  | -0.04    | 0.01 | 2.6E-09 | -0.02   | 0.03 | 5.0E-01 |
| insomnia | rs76145129 | T  | G  | -0.05    | 0.01 | 2.7E-08 | 0.00    | 0.04 | 9.5E-01 |
| insomnia | rs7599697  | T  | C  | -0.04    | 0.01 | 5.0E-09 | 0.04    | 0.03 | 1.8E-01 |
| insomnia | rs75932578 | T  | C  | -0.04    | 0.01 | 4.1E-08 | 0.00    | 0.03 | 9.7E-01 |
| insomnia | rs7571486  | A  | G  | -0.04    | 0.01 | 1.4E-08 | 0.00    | 0.03 | 9.0E-01 |
| insomnia | rs75452188 | A  | G  | 0.05     | 0.01 | 1.6E-08 | 0.08    | 0.04 | 5.6E-02 |
| insomnia | rs7475916  | C  | G  | -0.04    | 0.01 | 6.7E-09 | 0.03    | 0.03 | 3.7E-01 |
| insomnia | rs742760   | A  | T  | 0.04     | 0.01 | 2.5E-08 | -0.02   | 0.03 | 4.8E-01 |
| insomnia | rs7402939  | T  | C  | -0.04    | 0.01 | 5.2E-09 | 0.00    | 0.03 | 8.7E-01 |
| insomnia | rs73671843 | A  | G  | -0.06    | 0.01 | 5.5E-10 | -0.07   | 0.04 | 8.5E-02 |
| insomnia | rs72899452 | T  | C  | 0.07     | 0.01 | 1.0E-09 | -0.05   | 0.05 | 3.7E-01 |
| insomnia | rs72820274 | A  | G  | 0.03     | 0.01 | 1.3E-08 | 0.03    | 0.03 | 1.9E-01 |
| insomnia | rs728017   | A  | G  | -0.03    | 0.01 | 9.5E-09 | 0.00    | 0.03 | 8.6E-01 |
| insomnia | rs72773790 | T  | C  | 0.04     | 0.01 | 3.7E-09 | 0.01    | 0.03 | 8.1E-01 |
| insomnia | rs72657797 | T  | C  | -0.06    | 0.01 | 1.5E-12 | -0.01   | 0.03 | 8.6E-01 |
| insomnia | rs7214267  | A  | G  | -0.04    | 0.01 | 5.1E-13 | -0.04   | 0.03 | 1.8E-01 |
| insomnia | rs7168238  | C  | G  | 0.06     | 0.01 | 1.8E-08 | 0.06    | 0.05 | 2.3E-01 |

|          |            |   |   |       |      |         |       |      |         |
|----------|------------|---|---|-------|------|---------|-------|------|---------|
| insomnia | rs715338   | A | G | 0.04  | 0.01 | 7.9E-12 | 0.00  | 0.03 | 8.9E-01 |
| insomnia | rs7044885  | C | G | -0.04 | 0.01 | 5.7E-12 | 0.01  | 0.03 | 7.2E-01 |
| insomnia | rs7040224  | A | G | 0.04  | 0.01 | 4.2E-09 | 0.03  | 0.03 | 2.2E-01 |
| insomnia | rs701394   | A | G | -0.04 | 0.01 | 6.8E-09 | 0.00  | 0.03 | 9.7E-01 |
| insomnia | rs699844   | A | G | 0.06  | 0.01 | 4.1E-08 | -0.07 | 0.05 | 1.8E-01 |
| insomnia | rs6978112  | T | C | 0.03  | 0.01 | 2.1E-08 | 0.00  | 0.03 | 9.0E-01 |
| insomnia | rs6967168  | T | G | -0.04 | 0.01 | 1.4E-10 | 0.00  | 0.03 | 8.8E-01 |
| insomnia | rs694786   | T | C | -0.04 | 0.01 | 2.0E-13 | -0.01 | 0.03 | 7.5E-01 |
| insomnia | rs6888135  | A | C | 0.04  | 0.01 | 1.2E-10 | -0.01 | 0.03 | 6.9E-01 |
| insomnia | rs6808140  | T | C | 0.04  | 0.01 | 5.4E-11 | -0.02 | 0.03 | 4.8E-01 |
| insomnia | rs6756610  | C | G | 0.04  | 0.01 | 1.1E-09 | 0.00  | 0.03 | 9.8E-01 |
| insomnia | rs6734957  | T | G | -0.04 | 0.01 | 1.8E-09 | -0.01 | 0.03 | 8.2E-01 |
| insomnia | rs671985   | A | G | -0.04 | 0.01 | 2.8E-10 | 0.00  | 0.03 | 9.7E-01 |
| insomnia | rs670501   | T | C | 0.05  | 0.01 | 7.4E-13 | 0.03  | 0.03 | 3.2E-01 |
| insomnia | rs6702604  | A | G | -0.04 | 0.01 | 1.3E-09 | 0.00  | 0.03 | 8.8E-01 |
| insomnia | rs667730   | T | C | 0.03  | 0.01 | 2.3E-08 | -0.02 | 0.03 | 5.7E-01 |
| insomnia | rs66674044 | A | T | -0.06 | 0.01 | 2.2E-12 | -0.01 | 0.04 | 8.2E-01 |
| insomnia | rs6606731  | A | T | 0.04  | 0.01 | 1.5E-08 | -0.03 | 0.03 | 4.6E-01 |
| insomnia | rs6601080  | A | G | 0.04  | 0.01 | 2.2E-08 | -0.02 | 0.03 | 5.4E-01 |
| insomnia | rs6597649  | T | C | 0.03  | 0.01 | 3.0E-08 | 0.01  | 0.03 | 6.6E-01 |
| insomnia | rs6589988  | A | G | -0.04 | 0.01 | 4.7E-09 | 0.04  | 0.03 | 1.3E-01 |
| insomnia | rs6562066  | T | C | 0.04  | 0.01 | 1.4E-10 | 0.02  | 0.03 | 5.5E-01 |
| insomnia | rs6545798  | A | T | -0.04 | 0.01 | 1.2E-11 | -0.02 | 0.03 | 5.4E-01 |
| insomnia | rs6510033  | A | G | -0.04 | 0.01 | 4.7E-08 | 0.00  | 0.03 | 9.2E-01 |
| insomnia | rs647905   | T | C | 0.03  | 0.01 | 2.9E-08 | 0.01  | 0.03 | 7.3E-01 |
| insomnia | rs6465151  | T | C | 0.06  | 0.01 | 1.9E-09 | 0.03  | 0.04 | 4.1E-01 |
| insomnia | rs6457796  | T | C | -0.04 | 0.01 | 1.1E-08 | -0.02 | 0.03 | 4.8E-01 |
| insomnia | rs62429521 | A | C | 0.05  | 0.01 | 1.8E-09 | 0.02  | 0.04 | 6.6E-01 |
| insomnia | rs62383308 | A | G | -0.06 | 0.01 | 4.0E-08 | -0.05 | 0.05 | 3.3E-01 |
| insomnia | rs623025   | T | C | -0.04 | 0.01 | 3.2E-08 | 0.00  | 0.03 | 9.3E-01 |
| insomnia | rs62301574 | C | G | -0.04 | 0.01 | 1.4E-08 | -0.03 | 0.03 | 3.1E-01 |
| insomnia | rs62264767 | A | C | 0.06  | 0.01 | 1.6E-14 | -0.01 | 0.04 | 7.0E-01 |
| insomnia | rs62213452 | T | G | 0.04  | 0.01 | 2.4E-08 | -0.01 | 0.03 | 6.7E-01 |
| insomnia | rs62158170 | A | G | 0.07  | 0.01 | 1.2E-19 | 0.01  | 0.03 | 8.3E-01 |
| insomnia | rs62068188 | T | C | 0.05  | 0.01 | 1.2E-09 | 0.04  | 0.04 | 2.9E-01 |
| insomnia | rs61921611 | T | C | -0.04 | 0.01 | 7.8E-12 | 0.05  | 0.03 | 9.2E-02 |
| insomnia | rs6119267  | C | G | -0.06 | 0.01 | 2.3E-20 | -0.01 | 0.03 | 6.8E-01 |
| insomnia | rs60565673 | T | G | -0.04 | 0.01 | 1.6E-12 | -0.04 | 0.03 | 1.4E-01 |
| insomnia | rs6019663  | T | C | 0.04  | 0.01 | 6.5E-10 | -0.03 | 0.03 | 3.7E-01 |
| insomnia | rs5877     | T | C | 0.04  | 0.01 | 1.2E-08 | 0.03  | 0.03 | 2.8E-01 |

|          |            |   |   |       |      |         |       |      |         |
|----------|------------|---|---|-------|------|---------|-------|------|---------|
| insomnia | rs566673   | T | G | -0.04 | 0.01 | 1.2E-10 | 0.02  | 0.03 | 5.5E-01 |
| insomnia | rs56133505 | A | G | 0.04  | 0.01 | 5.6E-12 | 0.00  | 0.03 | 8.7E-01 |
| insomnia | rs56097173 | T | C | 0.04  | 0.01 | 2.7E-10 | -0.04 | 0.03 | 1.8E-01 |
| insomnia | rs55972276 | A | C | 0.07  | 0.01 | 4.2E-17 | 0.01  | 0.04 | 7.0E-01 |
| insomnia | rs55772859 | A | C | 0.04  | 0.01 | 4.8E-11 | 0.01  | 0.03 | 6.7E-01 |
| insomnia | rs524859   | A | G | -0.04 | 0.01 | 1.5E-12 | 0.01  | 0.03 | 6.6E-01 |
| insomnia | rs521484   | A | G | -0.04 | 0.01 | 1.5E-08 | 0.03  | 0.03 | 4.1E-01 |
| insomnia | rs4981170  | A | G | -0.05 | 0.01 | 7.3E-13 | -0.01 | 0.03 | 6.7E-01 |
| insomnia | rs492858   | T | C | -0.07 | 0.01 | 3.5E-09 | -0.02 | 0.05 | 7.6E-01 |
| insomnia | rs4858708  | A | T | -0.03 | 0.01 | 1.2E-08 | 0.00  | 0.03 | 9.6E-01 |
| insomnia | rs4788203  | A | G | -0.03 | 0.01 | 6.3E-09 | 0.02  | 0.03 | 4.9E-01 |
| insomnia | rs4767645  | T | G | -0.04 | 0.01 | 6.5E-10 | 0.03  | 0.03 | 1.9E-01 |
| insomnia | rs4709655  | T | C | -0.05 | 0.01 | 3.1E-09 | -0.03 | 0.04 | 4.2E-01 |
| insomnia | rs4702     | A | G | -0.05 | 0.01 | 6.8E-16 | 0.05  | 0.03 | 4.6E-02 |
| insomnia | rs4699157  | T | C | -0.08 | 0.02 | 4.0E-08 | -0.03 | 0.07 | 6.9E-01 |
| insomnia | rs4664299  | T | C | -0.04 | 0.01 | 5.0E-09 | -0.04 | 0.03 | 2.6E-01 |
| insomnia | rs4643373  | T | C | 0.04  | 0.01 | 1.6E-10 | 0.07  | 0.03 | 1.5E-02 |
| insomnia | rs4592425  | T | G | 0.04  | 0.01 | 4.3E-10 | 0.03  | 0.03 | 3.9E-01 |
| insomnia | rs4588900  | A | G | 0.03  | 0.01 | 1.6E-08 | 0.02  | 0.03 | 5.6E-01 |
| insomnia | rs4502882  | T | C | -0.04 | 0.01 | 8.0E-10 | -0.03 | 0.03 | 3.1E-01 |
| insomnia | rs429358   | T | C | 0.05  | 0.01 | 2.1E-08 | -0.10 | 0.04 | 5.3E-03 |
| insomnia | rs4260410  | T | C | 0.03  | 0.01 | 4.9E-08 | -0.04 | 0.03 | 1.5E-01 |
| insomnia | rs4238755  | A | C | -0.04 | 0.01 | 2.3E-10 | -0.02 | 0.03 | 5.5E-01 |
| insomnia | rs4090240  | T | C | -0.04 | 0.01 | 8.5E-09 | -0.01 | 0.03 | 7.5E-01 |
| insomnia | rs3902952  | T | C | 0.05  | 0.01 | 2.5E-10 | -0.07 | 0.03 | 4.9E-02 |
| insomnia | rs3774751  | T | G | -0.04 | 0.01 | 7.3E-12 | 0.00  | 0.03 | 9.8E-01 |
| insomnia | rs35539975 | A | G | 0.04  | 0.01 | 4.5E-09 | 0.02  | 0.03 | 5.5E-01 |
| insomnia | rs35322724 | A | C | 0.05  | 0.01 | 3.8E-16 | -0.03 | 0.03 | 3.5E-01 |
| insomnia | rs35110063 | A | G | 0.04  | 0.01 | 8.8E-11 | 0.04  | 0.03 | 1.4E-01 |
| insomnia | rs34967082 | A | G | 0.04  | 0.01 | 4.3E-09 | 0.03  | 0.03 | 2.9E-01 |
| insomnia | rs34490907 | C | G | 0.05  | 0.01 | 1.8E-08 | 0.01  | 0.04 | 8.2E-01 |
| insomnia | rs34214423 | A | C | 0.04  | 0.01 | 3.2E-09 | 0.04  | 0.03 | 2.6E-01 |
| insomnia | rs324017   | A | C | 0.04  | 0.01 | 1.6E-09 | 0.00  | 0.03 | 9.3E-01 |
| insomnia | rs3184470  | A | G | -0.04 | 0.01 | 9.7E-10 | -0.01 | 0.03 | 6.3E-01 |
| insomnia | rs314281   | T | C | -0.04 | 0.01 | 6.0E-13 | -0.05 | 0.03 | 5.3E-02 |
| insomnia | rs3131638  | A | G | -0.04 | 0.01 | 7.9E-10 | -0.05 | 0.03 | 1.2E-01 |
| insomnia | rs2867690  | T | C | 0.04  | 0.01 | 3.7E-08 | -0.05 | 0.03 | 1.8E-01 |
| insomnia | rs28611339 | T | G | 0.06  | 0.01 | 8.5E-11 | 0.05  | 0.04 | 1.9E-01 |
| insomnia | rs28582096 | A | G | -0.05 | 0.01 | 1.7E-13 | -0.03 | 0.03 | 3.2E-01 |
| insomnia | rs28552587 | A | G | 0.03  | 0.01 | 3.3E-08 | -0.01 | 0.03 | 8.4E-01 |

|          |             |   |   |       |      |         |       |      |         |
|----------|-------------|---|---|-------|------|---------|-------|------|---------|
| insomnia | rs2838787   | A | G | -0.04 | 0.01 | 7.7E-09 | -0.01 | 0.03 | 6.2E-01 |
| insomnia | rs2792990   | C | G | 0.05  | 0.01 | 1.2E-10 | 0.00  | 0.04 | 9.4E-01 |
| insomnia | rs2737240   | A | G | 0.04  | 0.01 | 3.4E-08 | 0.01  | 0.03 | 8.0E-01 |
| insomnia | rs2598293   | T | C | 0.04  | 0.01 | 2.5E-09 | 0.04  | 0.03 | 1.1E-01 |
| insomnia | rs2431108   | T | C | -0.05 | 0.01 | 7.8E-17 | 0.05  | 0.03 | 1.0E-01 |
| insomnia | rs2389631   | A | C | -0.04 | 0.01 | 2.0E-10 | -0.02 | 0.03 | 4.5E-01 |
| insomnia | rs2388840   | A | G | -0.04 | 0.01 | 1.4E-09 | -0.04 | 0.03 | 1.4E-01 |
| insomnia | rs2364921   | T | C | -0.03 | 0.01 | 2.1E-08 | 0.00  | 0.03 | 9.3E-01 |
| insomnia | rs2286729   | A | G | 0.07  | 0.01 | 5.4E-11 | 0.04  | 0.05 | 4.2E-01 |
| insomnia | rs224029    | T | C | -0.04 | 0.01 | 2.5E-10 | 0.05  | 0.03 | 6.9E-02 |
| insomnia | rs2221119   | C | G | 0.04  | 0.01 | 2.0E-09 | 0.04  | 0.03 | 1.8E-01 |
| insomnia | rs2216427   | C | G | 0.04  | 0.01 | 1.6E-08 | -0.03 | 0.03 | 2.4E-01 |
| insomnia | rs214934    | A | T | -0.04 | 0.01 | 3.2E-09 | -0.04 | 0.03 | 1.2E-01 |
| insomnia | rs2089358   | T | C | -0.04 | 0.01 | 2.7E-10 | -0.05 | 0.03 | 9.8E-02 |
| insomnia | rs2030672   | C | G | 0.03  | 0.01 | 1.1E-08 | 0.00  | 0.03 | 9.4E-01 |
| insomnia | rs1937447   | C | G | -0.04 | 0.01 | 2.1E-08 | -0.02 | 0.03 | 4.7E-01 |
| insomnia | rs1927902   | T | C | 0.05  | 0.01 | 1.1E-14 | -0.01 | 0.03 | 8.6E-01 |
| insomnia | rs190073    | A | G | -0.03 | 0.01 | 2.9E-08 | -0.05 | 0.03 | 8.3E-02 |
| insomnia | rs1861412   | A | G | 0.04  | 0.01 | 1.7E-10 | 0.04  | 0.03 | 1.1E-01 |
| insomnia | rs176644    | T | G | 0.04  | 0.01 | 9.5E-09 | 0.01  | 0.03 | 6.6E-01 |
| insomnia | rs17643634  | T | C | -0.06 | 0.01 | 1.3E-13 | 0.02  | 0.04 | 6.8E-01 |
| insomnia | rs17520265  | A | G | -0.09 | 0.02 | 2.9E-08 | 0.11  | 0.07 | 1.3E-01 |
| insomnia | rs17367725  | T | C | -0.04 | 0.01 | 9.3E-09 | -0.02 | 0.03 | 4.6E-01 |
| insomnia | rs1731951   | A | T | -0.03 | 0.01 | 1.4E-08 | 0.02  | 0.03 | 4.8E-01 |
| insomnia | rs17223714  | A | G | 0.05  | 0.01 | 2.4E-10 | -0.04 | 0.03 | 2.6E-01 |
| insomnia | rs17083297  | A | C | -0.04 | 0.01 | 1.6E-08 | 0.00  | 0.03 | 9.8E-01 |
| insomnia | rs17025198  | A | G | 0.04  | 0.01 | 2.2E-08 | -0.01 | 0.03 | 8.6E-01 |
| insomnia | rs17005118  | A | G | 0.04  | 0.01 | 6.1E-10 | 0.00  | 0.03 | 9.0E-01 |
| insomnia | rs16990210  | T | C | -0.05 | 0.01 | 2.0E-08 | -0.01 | 0.04 | 8.9E-01 |
| insomnia | rs16903122  | T | C | 0.06  | 0.01 | 9.0E-16 | -0.01 | 0.03 | 8.7E-01 |
| insomnia | rs1620977   | A | G | 0.05  | 0.01 | 2.3E-14 | -0.02 | 0.03 | 5.4E-01 |
| insomnia | rs1580173   | A | G | 0.03  | 0.01 | 2.3E-08 | 0.01  | 0.03 | 7.9E-01 |
| insomnia | rs1567084   | A | G | 0.03  | 0.01 | 2.1E-08 | 0.03  | 0.03 | 2.4E-01 |
| insomnia | rs1536053   | T | C | -0.04 | 0.01 | 6.0E-09 | 0.00  | 0.03 | 9.2E-01 |
| insomnia | rs1530938   | A | G | 0.04  | 0.01 | 8.8E-10 | 0.04  | 0.03 | 1.1E-01 |
| insomnia | rs152555    | A | G | -0.05 | 0.01 | 4.8E-10 | 0.02  | 0.04 | 5.9E-01 |
| insomnia | rs1519102   | C | G | -0.04 | 0.01 | 1.9E-08 | -0.03 | 0.03 | 2.7E-01 |
| insomnia | rs138678612 | A | G | -0.12 | 0.02 | 1.4E-08 | 0.07  | 0.08 | 4.1E-01 |
| insomnia | rs13138995  | A | G | 0.03  | 0.01 | 2.0E-08 | 0.02  | 0.03 | 5.7E-01 |
| insomnia | rs13135092  | A | G | -0.09 | 0.01 | 2.5E-16 | 0.00  | 0.05 | 9.7E-01 |

|          |             |   |   |       |      |         |       |      |         |
|----------|-------------|---|---|-------|------|---------|-------|------|---------|
| insomnia | rs13010288  | T | G | -0.06 | 0.01 | 9.3E-12 | -0.03 | 0.04 | 5.0E-01 |
| insomnia | rs12991815  | C | G | 0.04  | 0.01 | 3.0E-11 | -0.04 | 0.03 | 1.5E-01 |
| insomnia | rs12983032  | A | G | -0.04 | 0.01 | 1.1E-11 | 0.03  | 0.03 | 2.2E-01 |
| insomnia | rs12924275  | T | C | 0.04  | 0.01 | 1.9E-08 | -0.01 | 0.03 | 8.5E-01 |
| insomnia | rs12917449  | A | C | -0.04 | 0.01 | 3.0E-08 | 0.01  | 0.03 | 8.1E-01 |
| insomnia | rs12912299  | T | C | -0.04 | 0.01 | 4.4E-13 | 0.02  | 0.03 | 5.0E-01 |
| insomnia | rs1289939   | T | C | -0.04 | 0.01 | 6.0E-09 | -0.02 | 0.03 | 5.2E-01 |
| insomnia | rs12790660  | T | C | -0.04 | 0.01 | 4.5E-10 | 0.04  | 0.03 | 2.0E-01 |
| insomnia | rs12666306  | A | G | 0.04  | 0.01 | 2.2E-12 | 0.02  | 0.03 | 4.5E-01 |
| insomnia | rs12605642  | T | G | 0.04  | 0.01 | 2.1E-09 | -0.03 | 0.03 | 2.4E-01 |
| insomnia | rs12520974  | T | C | -0.04 | 0.01 | 1.7E-09 | 0.01  | 0.03 | 8.3E-01 |
| insomnia | rs12454003  | C | G | -0.03 | 0.01 | 4.9E-09 | -0.01 | 0.03 | 7.6E-01 |
| insomnia | rs12310246  | A | G | 0.04  | 0.01 | 4.7E-11 | -0.02 | 0.03 | 5.4E-01 |
| insomnia | rs12251016  | A | T | -0.04 | 0.01 | 3.9E-10 | 0.01  | 0.03 | 6.6E-01 |
| insomnia | rs12187443  | T | C | 0.04  | 0.01 | 1.6E-10 | 0.01  | 0.03 | 6.3E-01 |
| insomnia | rs12030482  | A | T | 0.04  | 0.01 | 8.2E-09 | -0.02 | 0.03 | 5.4E-01 |
| insomnia | rs118166957 | T | C | 0.07  | 0.01 | 2.0E-16 | 0.02  | 0.04 | 6.4E-01 |
| insomnia | rs11803128  | A | G | -0.04 | 0.01 | 6.9E-11 | 0.00  | 0.03 | 9.8E-01 |
| insomnia | rs11756035  | C | G | 0.05  | 0.01 | 1.3E-08 | -0.01 | 0.04 | 8.3E-01 |
| insomnia | rs11722569  | T | C | 0.03  | 0.01 | 2.9E-08 | 0.00  | 0.03 | 9.1E-01 |
| insomnia | rs117152417 | A | G | -0.15 | 0.03 | 2.8E-08 | 0.15  | 0.11 | 1.8E-01 |
| insomnia | rs11679943  | A | G | 0.04  | 0.01 | 3.2E-09 | 0.00  | 0.03 | 9.9E-01 |
| insomnia | rs1167132   | T | C | 0.04  | 0.01 | 8.7E-09 | 0.02  | 0.03 | 4.6E-01 |
| insomnia | rs11650304  | C | G | 0.07  | 0.01 | 1.2E-08 | 0.01  | 0.05 | 8.8E-01 |
| insomnia | rs116466468 | T | C | 0.04  | 0.01 | 2.1E-10 | 0.00  | 0.03 | 9.6E-01 |
| insomnia | rs11605348  | A | G | -0.04 | 0.01 | 7.0E-13 | 0.00  | 0.03 | 9.6E-01 |
| insomnia | rs11588755  | A | G | -0.03 | 0.01 | 5.1E-09 | -0.02 | 0.03 | 3.6E-01 |
| insomnia | rs1147852   | A | G | 0.04  | 0.01 | 9.9E-10 | -0.01 | 0.03 | 7.1E-01 |
| insomnia | rs113851554 | T | G | 0.21  | 0.01 | 1.6E-51 | 0.03  | 0.06 | 6.6E-01 |
| insomnia | rs11149313  | A | G | 0.04  | 0.01 | 2.4E-09 | 0.00  | 0.03 | 9.2E-01 |
| insomnia | rs11119409  | T | C | -0.03 | 0.01 | 1.2E-08 | 0.00  | 0.03 | 8.7E-01 |
| insomnia | rs11090039  | A | G | 0.04  | 0.01 | 1.8E-09 | -0.03 | 0.03 | 3.3E-01 |
| insomnia | rs11001276  | A | T | -0.04 | 0.01 | 2.5E-08 | -0.05 | 0.03 | 7.0E-02 |
| insomnia | rs10955647  | T | G | 0.03  | 0.01 | 1.8E-08 | 0.02  | 0.03 | 4.1E-01 |
| insomnia | rs10947987  | T | C | -0.03 | 0.01 | 4.1E-08 | -0.04 | 0.03 | 1.4E-01 |
| insomnia | rs10947690  | A | G | -0.05 | 0.01 | 4.0E-12 | 0.00  | 0.03 | 9.5E-01 |
| insomnia | rs10947428  | T | C | -0.07 | 0.01 | 9.1E-21 | -0.02 | 0.03 | 4.8E-01 |
| insomnia | rs10944696  | A | G | -0.04 | 0.01 | 8.0E-09 | 0.00  | 0.03 | 8.8E-01 |
| insomnia | rs10928256  | T | C | 0.03  | 0.01 | 1.6E-08 | 0.06  | 0.03 | 3.0E-02 |
| insomnia | rs10898940  | A | C | 0.03  | 0.01 | 8.1E-09 | 0.00  | 0.03 | 9.2E-01 |

|                |            |   |   |       |      |         |       |      |         |
|----------------|------------|---|---|-------|------|---------|-------|------|---------|
| insomnia       | rs10865954 | T | C | 0.04  | 0.01 | 1.9E-11 | 0.04  | 0.03 | 1.2E-01 |
| insomnia       | rs10825503 | T | G | 0.03  | 0.01 | 1.4E-08 | 0.01  | 0.03 | 7.7E-01 |
| insomnia       | rs10800992 | T | C | 0.04  | 0.01 | 3.8E-12 | 0.02  | 0.03 | 4.7E-01 |
| insomnia       | rs10761240 | A | G | -0.04 | 0.01 | 2.1E-12 | 0.01  | 0.03 | 8.2E-01 |
| insomnia       | rs10758593 | A | G | -0.04 | 0.01 | 4.9E-09 | -0.08 | 0.03 | 3.6E-03 |
| insomnia       | rs10756571 | T | C | 0.04  | 0.01 | 1.8E-08 | -0.03 | 0.03 | 2.9E-01 |
| insomnia       | rs1064939  | A | T | 0.13  | 0.02 | 2.2E-10 | 0.05  | 0.09 | 6.0E-01 |
| insomnia       | rs10502966 | A | G | -0.04 | 0.01 | 8.5E-11 | -0.02 | 0.03 | 4.9E-01 |
| insomnia       | rs1038093  | T | C | 0.04  | 0.01 | 2.5E-10 | 0.07  | 0.03 | 1.6E-02 |
| insomnia       | rs1031654  | A | C | -0.05 | 0.01 | 3.9E-12 | -0.04 | 0.03 | 2.4E-01 |
| insomnia       | rs1015438  | A | G | 0.06  | 0.01 | 2.5E-14 | -0.01 | 0.03 | 8.8E-01 |
| sleep duration | rs269054   | A | T | 0.67  | 0.13 | 1.5E-07 | -0.06 | 0.03 | 3.5E-02 |
| sleep duration | rs61796569 | T | C | 0.83  | 0.14 | 4.5E-09 | -0.03 | 0.03 | 3.9E-01 |
| sleep duration | rs12567114 | A | G | 0.85  | 0.14 | 2.1E-09 | -0.05 | 0.03 | 1.0E-01 |
| sleep duration | rs11190970 | G | A | 0.86  | 0.16 | 6.5E-08 | -0.01 | 0.03 | 6.7E-01 |
| sleep duration | rs7915425  | T | C | 1.01  | 0.16 | 8.2E-10 | 0.05  | 0.04 | 1.6E-01 |
| sleep duration | rs12246842 | A | G | 0.73  | 0.13 | 7.2E-09 | 0.02  | 0.03 | 4.3E-01 |
| sleep duration | rs10761674 | C | T | 0.70  | 0.13 | 2.5E-08 | -0.03 | 0.03 | 3.5E-01 |
| sleep duration | rs1939455  | G | T | 1.05  | 0.20 | 1.7E-07 | 0.01  | 0.04 | 8.3E-01 |
| sleep duration | rs7115226  | A | C | 1.59  | 0.26 | 1.7E-09 | -0.03 | 0.05 | 5.0E-01 |
| sleep duration | rs1263056  | A | G | 0.77  | 0.13 | 1.3E-09 | 0.01  | 0.03 | 7.9E-01 |
| sleep duration | rs7951019  | G | T | 2.21  | 0.39 | 1.2E-08 | -0.02 | 0.08 | 7.5E-01 |
| sleep duration | rs1057703  | G | T | 0.98  | 0.19 | 9.3E-08 | 0.03  | 0.04 | 3.7E-01 |
| sleep duration | rs1517572  | C | A | 0.81  | 0.13 | 1.7E-10 | 0.00  | 0.03 | 9.4E-01 |
| sleep duration | rs4592416  | G | A | 0.80  | 0.13 | 2.3E-10 | 0.03  | 0.03 | 2.7E-01 |
| sleep duration | rs11602180 | C | T | 0.92  | 0.17 | 5.8E-08 | -0.02 | 0.04 | 5.0E-01 |
| sleep duration | rs174560   | C | T | 0.79  | 0.14 | 5.8E-09 | 0.04  | 0.03 | 1.6E-01 |
| sleep duration | rs12791153 | T | A | 1.32  | 0.23 | 2.6E-08 | -0.04 | 0.05 | 4.7E-01 |
| sleep duration | rs1553132  | G | A | 0.85  | 0.14 | 5.1E-09 | 0.00  | 0.03 | 9.1E-01 |
| sleep duration | rs4767550  | G | A | 0.82  | 0.13 | 1.1E-10 | -0.04 | 0.03 | 1.2E-01 |
| sleep duration | rs34354917 | C | A | 0.67  | 0.14 | 1.8E-06 | 0.04  | 0.03 | 1.9E-01 |
| sleep duration | rs6575005  | T | C | 0.86  | 0.14 | 4.3E-09 | 0.00  | 0.03 | 9.9E-01 |
| sleep duration | rs10483350 | G | A | 0.86  | 0.16 | 6.4E-08 | 0.00  | 0.03 | 9.8E-01 |
| sleep duration | rs61985058 | T | C | 0.94  | 0.18 | 2.1E-07 | -0.03 | 0.04 | 5.0E-01 |
| sleep duration | rs55658675 | C | T | 0.72  | 0.13 | 4.9E-08 | 0.01  | 0.03 | 8.2E-01 |
| sleep duration | rs11621908 | C | T | 1.27  | 0.23 | 3.4E-08 | 0.01  | 0.05 | 9.1E-01 |
| sleep duration | rs8038326  | A | G | 0.91  | 0.14 | 1.2E-10 | 0.06  | 0.03 | 3.3E-02 |
| sleep duration | rs11643715 | G | C | 0.66  | 0.14 | 5.6E-06 | -0.05 | 0.03 | 1.1E-01 |
| sleep duration | rs9940646  | C | G | 1.02  | 0.14 | 1.2E-13 | 0.01  | 0.03 | 8.1E-01 |
| sleep duration | rs8050478  | G | A | 0.95  | 0.13 | 3.4E-14 | 0.01  | 0.03 | 8.3E-01 |



|                |             |   |   |      |      |         |       |      |         |
|----------------|-------------|---|---|------|------|---------|-------|------|---------|
| sleep duration | rs3095508   | C | A | 0.70 | 0.13 | 3.4E-08 | -0.04 | 0.03 | 1.3E-01 |
| sleep duration | rs205024    | T | C | 0.76 | 0.13 | 3.0E-09 | 0.02  | 0.03 | 4.3E-01 |
| sleep duration | rs1991556   | G | A | 0.99 | 0.16 | 1.0E-09 | 0.00  | 0.03 | 8.8E-01 |
| sleep duration | rs9903973   | C | T | 0.75 | 0.13 | 1.2E-08 | -0.02 | 0.03 | 5.4E-01 |
| sleep duration | rs7503199   | C | T | 0.81 | 0.14 | 6.9E-09 | 0.05  | 0.03 | 7.3E-02 |
| sleep duration | rs12607679  | T | C | 1.21 | 0.16 | 8.3E-15 | -0.09 | 0.03 | 2.5E-03 |
| sleep duration | rs10421649  | A | T | 0.91 | 0.13 | 5.8E-13 | -0.01 | 0.03 | 6.3E-01 |
| sleep duration | rs7556815   | A | G | 2.35 | 0.15 | 1.8E-54 | -0.01 | 0.03 | 7.9E-01 |
| sleep duration | rs12611523  | A | G | 0.70 | 0.13 | 2.6E-08 | 0.00  | 0.03 | 9.9E-01 |
| sleep duration | rs4128364   | C | T | 0.78 | 0.13 | 3.9E-09 | -0.02 | 0.03 | 4.8E-01 |
| sleep duration | rs4538155   | T | C | 0.76 | 0.13 | 5.8E-09 | -0.01 | 0.03 | 6.1E-01 |
| sleep duration | rs11885663  | T | C | 0.86 | 0.14 | 3.5E-09 | -0.03 | 0.03 | 3.6E-01 |
| sleep duration | rs10173260  | C | T | 0.62 | 0.13 | 1.6E-06 | 0.02  | 0.03 | 4.3E-01 |
| sleep duration | rs374153    | C | T | 0.99 | 0.17 | 8.5E-09 | 0.06  | 0.04 | 9.9E-02 |
| sleep duration | rs75539574  | C | A | 1.55 | 0.17 | 3.0E-19 | 0.03  | 0.05 | 5.8E-01 |
| sleep duration | rs72804080  | G | A | 1.07 | 0.19 | 2.9E-08 | -0.05 | 0.04 | 1.5E-01 |
| sleep duration | rs62120041  | T | C | 1.38 | 0.27 | 3.2E-07 | -0.01 | 0.05 | 8.4E-01 |
| sleep duration | rs2072727   | T | C | 0.70 | 0.13 | 3.8E-08 | -0.02 | 0.03 | 4.7E-01 |
| sleep duration | rs7644809   | T | C | 0.62 | 0.13 | 1.0E-06 | 0.02  | 0.03 | 4.2E-01 |
| sleep duration | rs13088093  | G | T | 0.91 | 0.13 | 8.4E-12 | 0.01  | 0.03 | 7.9E-01 |
| sleep duration | rs112230981 | A | G | 0.99 | 0.28 | 5.1E-04 | -0.11 | 0.06 | 6.3E-02 |
| sleep duration | rs17732997  | C | G | 0.64 | 0.13 | 5.2E-07 | 0.04  | 0.03 | 1.1E-01 |
| sleep duration | rs13109404  | T | G | 1.72 | 0.26 | 9.5E-11 | 0.02  | 0.05 | 7.1E-01 |
| sleep duration | rs2192528   | A | G | 0.67 | 0.13 | 9.9E-08 | -0.03 | 0.03 | 2.8E-01 |
| sleep duration | rs17427571  | A | G | 0.73 | 0.13 | 7.4E-08 | 0.01  | 0.03 | 8.2E-01 |
| sleep duration | rs35531607  | C | T | 0.71 | 0.13 | 2.2E-08 | 0.01  | 0.03 | 6.3E-01 |
| sleep duration | rs56372231  | T | C | 0.89 | 0.13 | 1.8E-11 | -0.03 | 0.03 | 3.3E-01 |
| sleep duration | rs180769    | T | C | 0.68 | 0.13 | 1.1E-07 | -0.01 | 0.03 | 7.3E-01 |
| sleep duration | rs365663    | A | G | 0.70 | 0.13 | 3.2E-08 | -0.01 | 0.03 | 7.1E-01 |
| sleep duration | rs151014368 | A | G | 0.76 | 0.15 | 4.1E-07 | -0.03 | 0.03 | 4.3E-01 |
| sleep duration | rs460692    | C | T | 1.21 | 0.20 | 3.2E-09 | -0.01 | 0.04 | 8.9E-01 |
| sleep duration | rs34556183  | A | G | 0.99 | 0.15 | 2.5E-11 | 0.00  | 0.03 | 9.9E-01 |
| sleep duration | rs80193650  | G | A | 0.77 | 0.18 | 2.3E-05 | -0.01 | 0.04 | 7.6E-01 |
| sleep duration | rs113113059 | T | C | 0.83 | 0.16 | 8.5E-08 | -0.06 | 0.03 | 4.9E-02 |
| sleep duration | rs9382445   | T | C | 0.85 | 0.13 | 6.3E-11 | 0.08  | 0.03 | 6.4E-03 |
| sleep duration | rs2231265   | G | A | 0.93 | 0.15 | 4.3E-10 | 0.00  | 0.03 | 8.9E-01 |
| sleep duration | rs9345234   | C | A | 0.71 | 0.13 | 2.1E-08 | -0.05 | 0.03 | 5.6E-02 |
| sleep duration | rs2079070   | C | G | 1.05 | 0.15 | 7.5E-12 | -0.06 | 0.03 | 4.7E-02 |
| sleep duration | rs7806045   | T | C | 0.89 | 0.14 | 1.1E-09 | -0.02 | 0.03 | 4.7E-01 |
| sleep duration | rs34731055  | T | C | 1.04 | 0.16 | 1.1E-10 | -0.04 | 0.04 | 2.3E-01 |

|                |             |   |   |       |      |         |       |      |         |
|----------------|-------------|---|---|-------|------|---------|-------|------|---------|
| sleep duration | rs73219758  | G | A | 0.91  | 0.14 | 4.6E-11 | -0.04 | 0.03 | 1.6E-01 |
| sleep duration | rs330088    | C | T | -0.67 | 0.13 | 1.1E-07 | 0.00  | 0.03 | 9.0E-01 |
| sleep duration | rs1776776   | T | C | 1.10  | 0.20 | 2.7E-08 | -0.06 | 0.04 | 1.1E-01 |
| sleep duration | rs10973207  | T | G | 1.05  | 0.17 | 1.3E-09 | 0.00  | 0.04 | 9.2E-01 |
| getting up     | rs301806    | C | T | -0.01 | 0.00 | 4.7E-08 | -0.11 | 0.03 | 8.2E-05 |
| getting up     | rs77576965  | T | C | 0.01  | 0.00 | 1.9E-08 | 0.02  | 0.03 | 5.4E-01 |
| getting up     | rs12752290  | C | T | 0.01  | 0.00 | 1.0E-12 | -0.01 | 0.03 | 8.2E-01 |
| getting up     | rs113240734 | A | G | 0.02  | 0.00 | 2.2E-16 | -0.05 | 0.04 | 1.7E-01 |
| getting up     | rs75650221  | T | C | 0.04  | 0.00 | 3.9E-18 | -0.08 | 0.07 | 2.7E-01 |
| getting up     | rs4652514   | C | T | -0.01 | 0.00 | 9.9E-09 | 0.00  | 0.03 | 9.3E-01 |
| getting up     | rs12736689  | C | T | 0.05  | 0.01 | 1.7E-24 | -0.02 | 0.08 | 8.5E-01 |
| getting up     | rs76048411  | T | C | 0.01  | 0.00 | 8.5E-10 | 0.02  | 0.03 | 4.2E-01 |
| getting up     | rs2053457   | C | T | -0.02 | 0.00 | 1.3E-15 | -0.03 | 0.03 | 2.6E-01 |
| getting up     | rs10180284  | T | C | 0.01  | 0.00 | 4.9E-08 | -0.03 | 0.03 | 2.2E-01 |
| getting up     | rs4671328   | T | G | 0.01  | 0.00 | 1.1E-09 | -0.05 | 0.03 | 9.5E-02 |
| getting up     | rs10175975  | T | C | 0.01  | 0.00 | 3.3E-09 | -0.07 | 0.04 | 4.7E-02 |
| getting up     | rs13393656  | A | C | 0.01  | 0.00 | 2.1E-08 | 0.03  | 0.03 | 2.9E-01 |
| getting up     | rs406952    | C | T | 0.01  | 0.00 | 1.2E-08 | 0.01  | 0.03 | 8.4E-01 |
| getting up     | rs4853283   | G | A | -0.01 | 0.00 | 1.8E-16 | -0.05 | 0.03 | 7.5E-02 |
| getting up     | rs1606803   | T | C | 0.01  | 0.00 | 3.2E-10 | 0.02  | 0.03 | 4.7E-01 |
| getting up     | rs116298301 | T | C | -0.02 | 0.00 | 2.4E-11 | 0.04  | 0.08 | 6.0E-01 |
| getting up     | rs4483990   | C | A | -0.02 | 0.00 | 6.4E-13 | 0.03  | 0.04 | 4.1E-01 |
| getting up     | rs13116306  | T | C | -0.01 | 0.00 | 1.8E-08 | -0.02 | 0.03 | 3.7E-01 |
| getting up     | rs10470887  | G | A | -0.01 | 0.00 | 4.0E-08 | 0.01  | 0.03 | 8.2E-01 |
| getting up     | rs9995419   | A | G | 0.01  | 0.00 | 1.5E-08 | 0.01  | 0.03 | 8.1E-01 |
| getting up     | rs79751662  | C | G | -0.02 | 0.00 | 2.3E-08 | -0.01 | 0.04 | 8.7E-01 |
| getting up     | rs1459192   | T | C | -0.01 | 0.00 | 2.5E-08 | -0.03 | 0.03 | 3.3E-01 |
| getting up     | rs12515274  | A | G | -0.01 | 0.00 | 5.4E-10 | 0.00  | 0.03 | 9.1E-01 |
| getting up     | rs4958316   | A | C | 0.02  | 0.00 | 3.7E-15 | 0.09  | 0.03 | 2.6E-03 |
| getting up     | rs553108    | A | G | 0.01  | 0.00 | 3.1E-08 | -0.04 | 0.03 | 1.5E-01 |
| getting up     | rs2653349   | A | G | 0.02  | 0.00 | 8.5E-29 | -0.03 | 0.03 | 3.0E-01 |
| getting up     | rs9399613   | T | C | -0.01 | 0.00 | 1.3E-08 | -0.01 | 0.03 | 8.1E-01 |
| getting up     | rs3735478   | T | G | -0.01 | 0.00 | 1.6E-08 | 0.05  | 0.03 | 1.0E-01 |
| getting up     | rs2944822   | T | C | 0.01  | 0.00 | 4.4E-09 | -0.04 | 0.03 | 1.3E-01 |
| getting up     | rs16917522  | C | T | 0.01  | 0.00 | 1.1E-09 | -0.01 | 0.03 | 7.9E-01 |
| getting up     | rs72663537  | G | T | -0.01 | 0.00 | 2.8E-08 | 0.06  | 0.04 | 1.1E-01 |
| getting up     | rs77641763  | T | C | -0.02 | 0.00 | 2.0E-11 | 0.02  | 0.04 | 6.2E-01 |
| getting up     | rs4962716   | T | C | -0.02 | 0.00 | 1.8E-09 | 0.06  | 0.04 | 1.3E-01 |
| getting up     | rs11229264  | A | G | -0.01 | 0.00 | 1.4E-10 | -0.02 | 0.03 | 4.9E-01 |
| getting up     | rs7297799   | T | C | -0.01 | 0.00 | 1.2E-12 | -0.03 | 0.03 | 2.1E-01 |

|             |            |   |   |       |      |         |       |      |         |
|-------------|------------|---|---|-------|------|---------|-------|------|---------|
| getting up  | rs2193749  | T | C | -0.01 | 0.00 | 1.8E-08 | -0.09 | 0.03 | 7.3E-04 |
| getting up  | rs6581138  | A | G | 0.01  | 0.00 | 2.3E-10 | 0.01  | 0.03 | 6.4E-01 |
| getting up  | rs1017168  | A | C | -0.01 | 0.00 | 2.6E-08 | -0.01 | 0.03 | 6.1E-01 |
| getting up  | rs74643199 | T | A | -0.01 | 0.00 | 1.2E-08 | 0.03  | 0.04 | 4.4E-01 |
| getting up  | rs4884166  | A | G | -0.01 | 0.00 | 1.2E-08 | 0.05  | 0.03 | 1.3E-01 |
| getting up  | rs7332608  | G | A | -0.03 | 0.00 | 4.6E-11 | -0.03 | 0.07 | 6.9E-01 |
| getting up  | rs6575012  | A | G | -0.01 | 0.00 | 2.6E-08 | 0.03  | 0.03 | 2.7E-01 |
| getting up  | rs3935182  | G | C | 0.01  | 0.00 | 6.8E-12 | -0.03 | 0.03 | 3.3E-01 |
| getting up  | rs1420607  | A | G | 0.01  | 0.00 | 1.6E-11 | -0.02 | 0.03 | 5.1E-01 |
| getting up  | rs11642015 | T | C | 0.01  | 0.00 | 6.2E-11 | -0.02 | 0.03 | 4.2E-01 |
| getting up  | rs1949072  | A | G | 0.01  | 0.00 | 2.5E-08 | -0.02 | 0.03 | 4.9E-01 |
| getting up  | rs17822102 | G | A | 0.01  | 0.00 | 9.4E-10 | -0.01 | 0.03 | 8.0E-01 |
| getting up  | rs11643192 | A | C | -0.01 | 0.00 | 1.3E-09 | 0.02  | 0.03 | 5.4E-01 |
| getting up  | rs4790352  | G | A | -0.02 | 0.00 | 8.8E-09 | 0.02  | 0.05 | 6.4E-01 |
| getting up  | rs3760185  | T | C | -0.01 | 0.00 | 4.5E-08 | 0.01  | 0.03 | 6.4E-01 |
| getting up  | rs7222039  | T | C | 0.01  | 0.00 | 3.4E-08 | -0.03 | 0.03 | 2.4E-01 |
| getting up  | rs12150229 | G | A | 0.01  | 0.00 | 3.5E-09 | 0.00  | 0.03 | 9.6E-01 |
| getting up  | rs77556405 | A | G | 0.02  | 0.00 | 1.6E-13 | 0.00  | 0.04 | 9.6E-01 |
| getting up  | rs12601968 | T | G | -0.01 | 0.00 | 1.2E-09 | 0.00  | 0.03 | 9.6E-01 |
| getting up  | rs4395148  | T | A | -0.01 | 0.00 | 2.4E-08 | -0.04 | 0.03 | 2.1E-01 |
| getting up  | rs8182491  | T | C | -0.02 | 0.00 | 1.2E-09 | -0.05 | 0.05 | 3.0E-01 |
| getting up  | rs3746601  | C | A | 0.01  | 0.00 | 2.9E-08 | -0.04 | 0.03 | 1.3E-01 |
| getting up  | rs11697690 | C | T | 0.01  | 0.00 | 2.3E-08 | 0.02  | 0.03 | 3.6E-01 |
| getting up  | rs74555583 | A | G | -0.02 | 0.00 | 3.0E-08 | -0.07 | 0.05 | 1.6E-01 |
| morningness | rs12065331 | T | C | -0.02 | 0.00 | 1.5E-10 | 0.03  | 0.03 | 3.7E-01 |
| morningness | rs17448682 | T | C | 0.02  | 0.00 | 4.0E-13 | 0.01  | 0.03 | 7.2E-01 |
| morningness | rs7543480  | T | C | 0.02  | 0.00 | 6.9E-13 | -0.02 | 0.03 | 4.0E-01 |
| morningness | rs12140153 | T | G | -0.03 | 0.00 | 4.6E-12 | -0.02 | 0.05 | 7.3E-01 |
| morningness | rs11208844 | A | G | -0.02 | 0.00 | 2.8E-08 | 0.07  | 0.04 | 5.6E-02 |
| morningness | rs11162296 | C | G | 0.04  | 0.00 | 1.5E-34 | -0.05 | 0.04 | 1.7E-01 |
| morningness | rs17416934 | T | C | 0.01  | 0.00 | 5.9E-09 | 0.03  | 0.03 | 3.1E-01 |
| morningness | rs74802342 | A | G | -0.02 | 0.00 | 2.1E-08 | -0.02 | 0.04 | 6.0E-01 |
| morningness | rs72720396 | A | G | -0.02 | 0.00 | 3.3E-18 | -0.01 | 0.03 | 6.7E-01 |
| morningness | rs7522677  | T | C | 0.02  | 0.00 | 7.9E-09 | 0.01  | 0.03 | 6.5E-01 |
| morningness | rs12139650 | T | G | 0.02  | 0.00 | 2.2E-08 | -0.01 | 0.03 | 7.6E-01 |
| morningness | rs10494041 | C | G | 0.02  | 0.00 | 1.0E-12 | 0.01  | 0.04 | 8.9E-01 |
| morningness | rs35461065 | T | C | -0.01 | 0.00 | 8.4E-09 | -0.01 | 0.03 | 5.8E-01 |
| morningness | rs2794682  | T | C | 0.02  | 0.00 | 3.9E-22 | 0.05  | 0.03 | 5.3E-02 |
| morningness | rs75650221 | T | C | 0.03  | 0.01 | 8.9E-10 | -0.08 | 0.07 | 2.7E-01 |
| morningness | rs13306728 | A | G | 0.03  | 0.00 | 6.2E-14 | 0.04  | 0.05 | 3.8E-01 |

|             |             |   |   |       |      |         |       |      |         |
|-------------|-------------|---|---|-------|------|---------|-------|------|---------|
| morningness | rs509476    | T | C | 0.10  | 0.01 | 7.4E-56 | -0.01 | 0.08 | 8.6E-01 |
| morningness | rs12746073  | T | C | 0.01  | 0.00 | 1.7E-08 | -0.06 | 0.03 | 3.5E-02 |
| morningness | rs12025393  | A | G | -0.01 | 0.00 | 1.8E-08 | 0.01  | 0.03 | 7.2E-01 |
| morningness | rs16839841  | T | G | 0.02  | 0.00 | 2.7E-08 | -0.01 | 0.05 | 8.8E-01 |
| morningness | rs13011556  | C | G | -0.02 | 0.00 | 7.7E-11 | -0.04 | 0.03 | 2.6E-01 |
| morningness | rs2712056   | T | C | 0.02  | 0.00 | 1.6E-10 | -0.01 | 0.03 | 7.2E-01 |
| morningness | rs848552    | C | G | -0.01 | 0.00 | 1.1E-09 | 0.01  | 0.03 | 7.7E-01 |
| morningness | rs62135536  | T | C | 0.04  | 0.01 | 1.4E-08 | 0.02  | 0.07 | 8.1E-01 |
| morningness | rs2592199   | C | G | 0.02  | 0.00 | 1.4E-14 | 0.04  | 0.03 | 2.3E-01 |
| morningness | rs10495976  | A | T | -0.02 | 0.00 | 1.0E-13 | 0.00  | 0.03 | 9.0E-01 |
| morningness | rs1520524   | T | C | 0.03  | 0.00 | 2.7E-12 | -0.01 | 0.04 | 7.5E-01 |
| morningness | rs10193431  | T | C | 0.01  | 0.00 | 4.4E-09 | 0.00  | 0.03 | 8.7E-01 |
| morningness | rs17049270  | T | C | -0.02 | 0.00 | 2.0E-08 | -0.04 | 0.05 | 4.4E-01 |
| morningness | rs10175975  | T | C | 0.02  | 0.00 | 1.9E-10 | -0.07 | 0.04 | 4.7E-02 |
| morningness | rs4672440   | T | G | 0.02  | 0.00 | 5.1E-13 | -0.01 | 0.03 | 6.6E-01 |
| morningness | rs113851554 | T | G | -0.03 | 0.01 | 1.3E-08 | 0.03  | 0.06 | 6.6E-01 |
| morningness | rs2706762   | T | C | -0.02 | 0.00 | 3.0E-10 | 0.02  | 0.04 | 5.4E-01 |
| morningness | rs7586062   | C | G | -0.02 | 0.00 | 3.1E-24 | -0.01 | 0.03 | 6.1E-01 |
| morningness | rs10190053  | A | C | -0.01 | 0.00 | 6.5E-09 | 0.03  | 0.03 | 3.2E-01 |
| morningness | rs75863239  | T | C | -0.02 | 0.00 | 3.2E-08 | 0.01  | 0.05 | 7.9E-01 |
| morningness | rs62172117  | A | G | -0.02 | 0.00 | 1.4E-17 | -0.02 | 0.03 | 4.6E-01 |
| morningness | rs7579662   | A | G | -0.01 | 0.00 | 2.2E-08 | 0.05  | 0.03 | 6.9E-02 |
| morningness | rs13004345  | T | C | -0.01 | 0.00 | 3.8E-08 | -0.01 | 0.03 | 8.0E-01 |
| morningness | rs11677484  | T | G | 0.02  | 0.00 | 6.2E-10 | -0.01 | 0.03 | 8.3E-01 |
| morningness | rs4850712   | T | G | 0.01  | 0.00 | 9.4E-09 | 0.02  | 0.03 | 5.7E-01 |
| morningness | rs6716898   | A | G | 0.02  | 0.00 | 2.3E-22 | 0.03  | 0.03 | 2.8E-01 |
| morningness | rs184033703 | A | G | 0.03  | 0.01 | 9.6E-10 | 0.00  | 0.06 | 9.7E-01 |
| morningness | rs35333999  | T | C | -0.05 | 0.01 | 5.1E-19 | 0.01  | 0.06 | 9.2E-01 |
| morningness | rs77942338  | T | C | -0.06 | 0.01 | 1.4E-16 | -0.04 | 0.08 | 6.4E-01 |
| morningness | rs11900963  | A | T | 0.05  | 0.00 | 3.2E-32 | -0.02 | 0.05 | 6.3E-01 |
| morningness | rs62182135  | A | C | -0.01 | 0.00 | 7.8E-09 | -0.07 | 0.03 | 1.1E-02 |
| morningness | rs17786957  | C | G | -0.02 | 0.00 | 6.1E-10 | 0.04  | 0.04 | 2.8E-01 |
| morningness | rs7428484   | A | G | 0.01  | 0.00 | 2.0E-08 | 0.02  | 0.03 | 4.8E-01 |
| morningness | rs62263597  | A | G | 0.03  | 0.00 | 4.8E-13 | -0.01 | 0.05 | 9.0E-01 |
| morningness | rs7652260   | C | G | 0.02  | 0.00 | 2.0E-08 | 0.02  | 0.04 | 5.8E-01 |
| morningness | rs67000219  | T | C | -0.02 | 0.00 | 2.7E-08 | 0.04  | 0.04 | 3.8E-01 |
| morningness | rs9876864   | A | T | 0.02  | 0.00 | 9.2E-14 | -0.03 | 0.03 | 3.3E-01 |
| morningness | rs55753638  | T | C | -0.02 | 0.00 | 2.9E-11 | -0.02 | 0.04 | 6.6E-01 |
| morningness | rs1800828   | C | G | 0.01  | 0.00 | 5.3E-09 | 0.01  | 0.03 | 7.5E-01 |
| morningness | rs6799356   | A | C | 0.01  | 0.00 | 4.1E-08 | -0.01 | 0.03 | 6.6E-01 |

|             |             |   |   |       |      |         |       |      |         |
|-------------|-------------|---|---|-------|------|---------|-------|------|---------|
| morningness | rs2699869   | A | C | 0.01  | 0.00 | 5.1E-09 | 0.04  | 0.03 | 1.5E-01 |
| morningness | rs1109088   | A | G | 0.01  | 0.00 | 2.6E-09 | -0.01 | 0.03 | 8.5E-01 |
| morningness | rs6769642   | A | C | 0.02  | 0.00 | 2.8E-13 | 0.03  | 0.03 | 2.2E-01 |
| morningness | rs3850174   | A | T | -0.01 | 0.00 | 9.1E-09 | 0.02  | 0.03 | 5.9E-01 |
| morningness | rs6443788   | A | C | -0.02 | 0.00 | 1.0E-09 | 0.01  | 0.03 | 7.4E-01 |
| morningness | rs6443810   | C | G | 0.02  | 0.00 | 2.5E-10 | 0.06  | 0.03 | 5.2E-02 |
| morningness | rs6778003   | T | G | 0.02  | 0.00 | 4.9E-12 | -0.04 | 0.03 | 1.8E-01 |
| morningness | rs7617588   | T | C | -0.02 | 0.00 | 3.5E-11 | 0.01  | 0.04 | 7.6E-01 |
| morningness | rs9683585   | C | G | -0.01 | 0.00 | 1.8E-08 | -0.01 | 0.03 | 7.4E-01 |
| morningness | rs56040212  | A | G | -0.01 | 0.00 | 2.2E-08 | -0.02 | 0.03 | 4.6E-01 |
| morningness | rs28634184  | T | C | -0.01 | 0.00 | 2.3E-08 | 0.00  | 0.03 | 9.2E-01 |
| morningness | rs57180764  | A | G | 0.02  | 0.00 | 3.2E-11 | 0.09  | 0.03 | 7.6E-03 |
| morningness | rs4241964   | T | G | -0.02 | 0.00 | 3.5E-12 | 0.00  | 0.03 | 9.4E-01 |
| morningness | rs3797051   | T | C | 0.02  | 0.00 | 1.5E-09 | 0.04  | 0.03 | 1.6E-01 |
| morningness | rs12657776  | A | G | 0.02  | 0.00 | 3.5E-14 | 0.01  | 0.03 | 8.6E-01 |
| morningness | rs304137    | A | G | 0.02  | 0.00 | 3.1E-14 | -0.07 | 0.03 | 1.1E-02 |
| morningness | rs286808    | T | C | 0.01  | 0.00 | 3.9E-09 | 0.00  | 0.03 | 9.5E-01 |
| morningness | rs2910032   | T | C | 0.02  | 0.00 | 6.2E-18 | 0.01  | 0.03 | 6.9E-01 |
| morningness | rs42210     | C | G | -0.01 | 0.00 | 3.5E-09 | 0.03  | 0.03 | 3.0E-01 |
| morningness | rs335433    | T | C | -0.01 | 0.00 | 2.3E-09 | -0.03 | 0.03 | 2.8E-01 |
| morningness | rs9395520   | T | C | 0.02  | 0.00 | 1.6E-18 | -0.04 | 0.03 | 1.5E-01 |
| morningness | rs9295795   | T | C | -0.03 | 0.01 | 1.9E-08 | 0.03  | 0.06 | 6.2E-01 |
| morningness | rs486416    | A | G | -0.01 | 0.00 | 6.1E-09 | 0.03  | 0.03 | 2.8E-01 |
| morningness | rs734597    | A | G | 0.02  | 0.00 | 1.6E-08 | 0.05  | 0.03 | 1.4E-01 |
| morningness | rs2653349   | A | G | 0.03  | 0.00 | 1.0E-32 | -0.03 | 0.03 | 3.0E-01 |
| morningness | rs2881955   | T | C | 0.02  | 0.00 | 5.6E-11 | 0.02  | 0.03 | 4.4E-01 |
| morningness | rs9375352   | A | T | 0.01  | 0.00 | 2.0E-08 | 0.01  | 0.03 | 6.7E-01 |
| morningness | rs4557564   | A | G | 0.03  | 0.00 | 2.1E-09 | -0.02 | 0.05 | 7.3E-01 |
| morningness | rs6935086   | T | C | 0.02  | 0.00 | 5.9E-09 | 0.02  | 0.04 | 6.1E-01 |
| morningness | rs9479402   | T | C | -0.10 | 0.01 | 1.3E-22 | 0.04  | 0.13 | 7.4E-01 |
| morningness | rs9348050   | T | C | 0.01  | 0.00 | 2.0E-09 | 0.02  | 0.03 | 4.7E-01 |
| morningness | rs16873715  | A | T | -0.02 | 0.00 | 4.4E-08 | 0.06  | 0.03 | 6.6E-02 |
| morningness | rs56382918  | T | C | 0.02  | 0.00 | 1.1E-12 | 0.02  | 0.03 | 4.9E-01 |
| morningness | rs10236197  | T | C | 0.01  | 0.00 | 2.0E-10 | -0.02 | 0.03 | 5.5E-01 |
| morningness | rs56049037  | A | G | -0.02 | 0.00 | 2.3E-12 | -0.05 | 0.03 | 1.2E-01 |
| morningness | rs4245555   | T | C | -0.02 | 0.00 | 2.0E-15 | 0.03  | 0.03 | 2.0E-01 |
| morningness | rs2138759   | A | G | 0.01  | 0.00 | 1.7E-09 | -0.03 | 0.03 | 3.4E-01 |
| morningness | rs2922966   | A | G | 0.03  | 0.00 | 1.1E-17 | -0.04 | 0.04 | 2.5E-01 |
| morningness | rs202157    | T | C | -0.02 | 0.00 | 1.2E-14 | 0.00  | 0.03 | 9.9E-01 |
| morningness | rs112613078 | A | G | -0.03 | 0.00 | 1.5E-20 | -0.01 | 0.03 | 7.9E-01 |

|             |            |   |   |       |      |         |       |      |         |
|-------------|------------|---|---|-------|------|---------|-------|------|---------|
| morningness | rs10262462 | A | G | -0.02 | 0.00 | 3.2E-12 | -0.06 | 0.03 | 2.1E-02 |
| morningness | rs6978514  | T | C | -0.01 | 0.00 | 4.9E-08 | -0.01 | 0.03 | 8.4E-01 |
| morningness | rs2971970  | T | G | 0.02  | 0.00 | 2.2E-11 | 0.07  | 0.03 | 2.4E-02 |
| morningness | rs35748596 | T | G | -0.02 | 0.00 | 2.4E-12 | 0.01  | 0.03 | 8.6E-01 |
| morningness | rs34344642 | T | G | -0.02 | 0.00 | 2.9E-09 | 0.00  | 0.05 | 9.7E-01 |
| morningness | rs12541362 | A | T | -0.02 | 0.00 | 5.6E-15 | 0.02  | 0.03 | 5.6E-01 |
| morningness | rs1919346  | A | G | 0.01  | 0.00 | 1.3E-08 | -0.01 | 0.03 | 8.1E-01 |
| morningness | rs11988076 | A | G | -0.02 | 0.00 | 1.8E-11 | 0.01  | 0.04 | 8.8E-01 |
| morningness | rs6472936  | T | C | 0.02  | 0.00 | 5.2E-12 | -0.03 | 0.03 | 3.4E-01 |
| morningness | rs1110275  | T | C | 0.02  | 0.00 | 4.1E-08 | -0.02 | 0.05 | 6.5E-01 |
| morningness | rs34578339 | A | T | -0.02 | 0.00 | 2.8E-08 | -0.01 | 0.04 | 7.8E-01 |
| morningness | rs72673588 | C | G | -0.02 | 0.00 | 1.3E-09 | 0.03  | 0.03 | 3.9E-01 |
| morningness | rs3100052  | A | G | 0.01  | 0.00 | 1.3E-08 | -0.02 | 0.03 | 4.9E-01 |
| morningness | rs2737245  | T | G | 0.02  | 0.00 | 2.9E-14 | 0.00  | 0.03 | 9.7E-01 |
| morningness | rs1323591  | T | C | -0.02 | 0.00 | 2.1E-12 | -0.01 | 0.03 | 7.2E-01 |
| morningness | rs2291589  | T | G | 0.02  | 0.00 | 1.7E-16 | 0.02  | 0.03 | 5.2E-01 |
| morningness | rs77598468 | A | C | -0.04 | 0.01 | 1.1E-12 | -0.10 | 0.07 | 1.7E-01 |
| morningness | rs4565536  | A | C | -0.01 | 0.00 | 5.0E-08 | 0.05  | 0.03 | 9.0E-02 |
| morningness | rs10797119 | T | C | -0.01 | 0.00 | 2.8E-09 | -0.02 | 0.03 | 5.6E-01 |
| morningness | rs28365587 | A | G | -0.01 | 0.00 | 3.6E-09 | -0.04 | 0.03 | 1.4E-01 |
| morningness | rs10448340 | T | G | -0.01 | 0.00 | 9.1E-09 | 0.02  | 0.03 | 4.5E-01 |
| morningness | rs28458909 | T | C | -0.03 | 0.00 | 1.9E-16 | 0.02  | 0.04 | 6.0E-01 |
| morningness | rs1750785  | A | G | 0.01  | 0.00 | 3.5E-09 | -0.01 | 0.03 | 7.0E-01 |
| morningness | rs9416744  | A | C | 0.02  | 0.00 | 1.5E-12 | 0.03  | 0.03 | 3.7E-01 |
| morningness | rs7910164  | A | G | 0.01  | 0.00 | 4.8E-08 | -0.01 | 0.03 | 7.1E-01 |
| morningness | rs76518095 | T | C | 0.02  | 0.00 | 1.0E-08 | 0.02  | 0.05 | 6.3E-01 |
| morningness | rs9795439  | A | G | 0.02  | 0.00 | 6.7E-09 | 0.05  | 0.03 | 1.8E-01 |
| morningness | rs925947   | T | G | 0.02  | 0.00 | 9.6E-10 | -0.03 | 0.03 | 4.3E-01 |
| morningness | rs12799529 | T | C | 0.02  | 0.00 | 5.1E-13 | 0.05  | 0.03 | 1.2E-01 |
| morningness | rs11032362 | A | G | 0.03  | 0.00 | 3.5E-17 | -0.03 | 0.05 | 5.6E-01 |
| morningness | rs34239319 | T | G | 0.02  | 0.00 | 6.5E-12 | -0.14 | 0.04 | 1.9E-03 |
| morningness | rs11039308 | A | G | 0.01  | 0.00 | 4.9E-11 | 0.01  | 0.03 | 7.0E-01 |
| morningness | rs3168135  | A | G | -0.02 | 0.00 | 3.6E-12 | -0.03 | 0.03 | 3.2E-01 |
| morningness | rs4008953  | A | G | -0.02 | 0.00 | 3.2E-11 | 0.00  | 0.03 | 9.0E-01 |
| morningness | rs4237555  | T | C | 0.01  | 0.00 | 4.2E-08 | 0.00  | 0.03 | 8.9E-01 |
| morningness | rs4936290  | A | C | -0.01 | 0.00 | 1.2E-08 | -0.02 | 0.03 | 4.9E-01 |
| morningness | rs577924   | T | C | 0.01  | 0.00 | 2.1E-08 | 0.02  | 0.03 | 5.4E-01 |
| morningness | rs1174510  | A | G | 0.01  | 0.00 | 4.9E-08 | -0.01 | 0.03 | 6.5E-01 |
| morningness | rs11611435 | T | C | 0.01  | 0.00 | 4.0E-08 | 0.00  | 0.03 | 9.9E-01 |
| morningness | rs7313852  | A | G | -0.03 | 0.00 | 1.0E-29 | -0.02 | 0.03 | 4.0E-01 |

|             |             |   |   |       |      |         |       |      |         |
|-------------|-------------|---|---|-------|------|---------|-------|------|---------|
| morningness | rs11183201  | T | C | -0.02 | 0.00 | 1.6E-14 | -0.09 | 0.03 | 1.1E-03 |
| morningness | rs671255    | A | G | -0.01 | 0.00 | 1.4E-08 | -0.04 | 0.03 | 1.8E-01 |
| morningness | rs7299922   | A | G | 0.01  | 0.00 | 8.6E-09 | 0.01  | 0.03 | 5.9E-01 |
| morningness | rs7138306   | A | G | 0.01  | 0.00 | 8.9E-10 | 0.03  | 0.03 | 2.3E-01 |
| morningness | rs7488974   | A | G | 0.02  | 0.00 | 1.8E-13 | -0.03 | 0.03 | 2.4E-01 |
| morningness | rs10861694  | T | C | 0.01  | 0.00 | 2.6E-10 | 0.03  | 0.03 | 1.9E-01 |
| morningness | rs4102203   | T | C | 0.02  | 0.00 | 7.8E-12 | 0.07  | 0.04 | 9.5E-02 |
| morningness | rs61963123  | T | C | 0.02  | 0.00 | 2.3E-10 | 0.03  | 0.03 | 3.1E-01 |
| morningness | rs9597250   | A | C | -0.02 | 0.00 | 2.9E-12 | 0.04  | 0.03 | 2.9E-01 |
| morningness | rs2593487   | A | G | -0.01 | 0.00 | 2.9E-10 | 0.00  | 0.03 | 9.7E-01 |
| morningness | rs9565309   | T | C | 0.07  | 0.01 | 1.3E-28 | 0.03  | 0.07 | 6.9E-01 |
| morningness | rs7337911   | A | G | 0.02  | 0.00 | 1.0E-09 | 0.02  | 0.03 | 4.7E-01 |
| morningness | rs9521184   | T | C | 0.01  | 0.00 | 8.3E-10 | -0.01 | 0.03 | 7.3E-01 |
| morningness | rs56376592  | A | C | 0.02  | 0.00 | 1.4E-09 | 0.05  | 0.04 | 1.2E-01 |
| morningness | rs4899502   | A | G | -0.02 | 0.00 | 1.6E-11 | -0.01 | 0.03 | 8.1E-01 |
| morningness | rs12432176  | A | C | 0.01  | 0.00 | 1.5E-08 | 0.00  | 0.03 | 9.2E-01 |
| morningness | rs2701524   | T | C | 0.01  | 0.00 | 5.4E-09 | 0.03  | 0.03 | 3.5E-01 |
| morningness | rs59986227  | C | G | -0.02 | 0.00 | 5.4E-09 | -0.07 | 0.03 | 2.0E-02 |
| morningness | rs12442008  | T | C | 0.01  | 0.00 | 3.4E-08 | -0.02 | 0.03 | 5.2E-01 |
| morningness | rs11852820  | C | G | -0.01 | 0.00 | 5.8E-10 | -0.01 | 0.03 | 6.4E-01 |
| morningness | rs2304467   | C | G | -0.01 | 0.00 | 3.9E-08 | 0.03  | 0.03 | 2.9E-01 |
| morningness | rs7196720   | T | C | 0.01  | 0.00 | 4.3E-09 | 0.03  | 0.03 | 2.2E-01 |
| morningness | rs12927162  | A | G | 0.03  | 0.00 | 2.1E-32 | -0.04 | 0.03 | 1.4E-01 |
| morningness | rs1421085   | T | C | -0.02 | 0.00 | 1.4E-25 | 0.02  | 0.03 | 4.4E-01 |
| morningness | rs2398144   | A | C | -0.02 | 0.00 | 2.4E-21 | -0.01 | 0.03 | 8.0E-01 |
| morningness | rs8044054   | T | C | 0.02  | 0.00 | 3.9E-12 | 0.01  | 0.03 | 6.1E-01 |
| morningness | rs17604349  | A | G | -0.02 | 0.00 | 1.2E-15 | -0.03 | 0.04 | 4.6E-01 |
| morningness | rs2518022   | T | C | 0.03  | 0.00 | 1.5E-16 | 0.09  | 0.05 | 7.7E-02 |
| morningness | rs2232839   | T | C | -0.03 | 0.00 | 2.4E-21 | 0.03  | 0.03 | 3.6E-01 |
| morningness | rs9915731   | A | T | -0.01 | 0.00 | 2.8E-08 | 0.01  | 0.03 | 7.5E-01 |
| morningness | rs225289    | T | C | 0.02  | 0.00 | 1.2E-08 | -0.02 | 0.04 | 5.2E-01 |
| morningness | rs72828815  | T | C | 0.02  | 0.00 | 6.1E-09 | -0.01 | 0.03 | 8.6E-01 |
| morningness | rs117974417 | C | G | -0.02 | 0.00 | 1.5E-09 | 0.03  | 0.04 | 4.9E-01 |
| morningness | rs6504758   | A | G | -0.01 | 0.00 | 9.8E-11 | -0.02 | 0.03 | 4.0E-01 |
| morningness | rs9898091   | T | C | 0.04  | 0.01 | 6.9E-12 | -0.12 | 0.07 | 6.0E-02 |
| morningness | rs8072058   | A | T | -0.02 | 0.00 | 1.4E-08 | 0.01  | 0.03 | 7.1E-01 |
| morningness | rs17682747  | A | G | 0.01  | 0.00 | 4.7E-08 | -0.05 | 0.03 | 1.1E-01 |
| morningness | rs2916142   | T | C | 0.02  | 0.00 | 7.6E-12 | -0.02 | 0.03 | 5.3E-01 |
| morningness | rs10491171  | C | G | 0.02  | 0.00 | 3.6E-09 | -0.01 | 0.04 | 7.0E-01 |
| morningness | rs487952    | A | G | 0.01  | 0.00 | 4.4E-09 | -0.04 | 0.03 | 1.5E-01 |

|             |            |   |   |       |      |         |       |      |         |
|-------------|------------|---|---|-------|------|---------|-------|------|---------|
| morningness | rs974552   | A | G | -0.02 | 0.00 | 1.4E-15 | 0.02  | 0.03 | 4.8E-01 |
| morningness | rs1013987  | T | C | -0.02 | 0.00 | 1.4E-11 | -0.01 | 0.03 | 6.5E-01 |
| morningness | rs4239386  | A | T | -0.02 | 0.00 | 2.1E-17 | -0.04 | 0.03 | 1.5E-01 |
| morningness | rs12969848 | T | C | 0.02  | 0.00 | 1.5E-15 | -0.02 | 0.03 | 4.2E-01 |
| morningness | rs989885   | A | G | -0.02 | 0.00 | 3.8E-08 | 0.04  | 0.06 | 5.2E-01 |
| morningness | rs9956387  | A | T | -0.01 | 0.00 | 1.4E-10 | 0.01  | 0.03 | 8.2E-01 |
| morningness | rs17596722 | T | C | -0.02 | 0.00 | 3.2E-11 | -0.02 | 0.03 | 6.1E-01 |
| morningness | rs9964420  | A | C | -0.02 | 0.00 | 4.0E-21 | -0.01 | 0.03 | 7.5E-01 |
| morningness | rs11152350 | A | C | -0.02 | 0.00 | 1.1E-12 | 0.03  | 0.03 | 2.9E-01 |
| morningness | rs9958145  | A | G | -0.02 | 0.00 | 4.3E-08 | -0.01 | 0.03 | 6.6E-01 |
| morningness | rs10402849 | T | C | 0.02  | 0.00 | 6.7E-09 | -0.02 | 0.03 | 6.0E-01 |
| morningness | rs3843751  | T | C | 0.01  | 0.00 | 6.3E-09 | 0.02  | 0.03 | 5.8E-01 |
| morningness | rs9636202  | A | G | -0.01 | 0.00 | 3.5E-08 | -0.04 | 0.03 | 1.9E-01 |
| morningness | rs12481462 | T | C | 0.01  | 0.00 | 4.4E-08 | -0.02 | 0.03 | 5.0E-01 |
| morningness | rs78095690 | T | C | -0.01 | 0.00 | 5.8E-09 | 0.01  | 0.03 | 6.3E-01 |
| morningness | rs6131942  | A | G | -0.02 | 0.00 | 7.6E-12 | -0.01 | 0.03 | 7.6E-01 |
| morningness | rs1737893  | T | C | -0.01 | 0.00 | 1.4E-09 | 0.03  | 0.03 | 3.4E-01 |
| morningness | rs2072727  | T | C | 0.01  | 0.00 | 3.5E-08 | -0.02 | 0.03 | 4.7E-01 |
| morningness | rs695459   | T | C | -0.01 | 0.00 | 6.6E-09 | 0.01  | 0.03 | 7.5E-01 |
| morningness | rs28580373 | A | G | 0.01  | 0.00 | 3.3E-08 | -0.01 | 0.03 | 7.6E-01 |
| morningness | rs11705370 | A | T | -0.02 | 0.00 | 3.4E-15 | 0.02  | 0.03 | 4.0E-01 |
| morningness | rs4822107  | A | G | 0.01  | 0.00 | 2.2E-08 | 0.05  | 0.03 | 8.5E-02 |
| morningness | rs2294203  | A | G | 0.01  | 0.00 | 3.0E-08 | -0.03 | 0.03 | 3.6E-01 |
| snoring     | rs35562935 | A | G | 1.06  | 0.01 | 1.7E-05 | 0.08  | 0.05 | 9.7E-02 |
| snoring     | rs72906130 | G | C | 1.06  | 0.01 | 3.5E-14 | 0.04  | 0.04 | 3.4E-01 |
| snoring     | rs9309771  | A | G | 1.03  | 0.01 | 5.7E-09 | 0.00  | 0.03 | 9.2E-01 |
| snoring     | rs34811474 | A | G | 0.96  | 0.01 | 4.2E-08 | -0.03 | 0.03 | 3.4E-01 |
| snoring     | rs6855873  | T | C | 1.03  | 0.01 | 2.1E-05 | 0.05  | 0.03 | 1.0E-01 |
| snoring     | rs2307111  | C | T | 0.97  | 0.01 | 1.3E-08 | 0.03  | 0.03 | 2.4E-01 |
| snoring     | rs10062026 | A | G | 0.97  | 0.01 | 2.1E-05 | -0.01 | 0.03 | 6.6E-01 |
| snoring     | rs947612   | G | A | 1.03  | 0.01 | 9.9E-06 | -0.01 | 0.03 | 8.2E-01 |
| snoring     | rs17060460 | G | A | 1.03  | 0.01 | 1.4E-08 | 0.02  | 0.03 | 4.6E-01 |
| snoring     | rs9389081  | A | T | 0.95  | 0.01 | 4.4E-08 | 0.01  | 0.05 | 8.1E-01 |
| snoring     | rs2981329  | C | T | 1.03  | 0.01 | 7.7E-09 | 0.00  | 0.03 | 8.8E-01 |
| snoring     | rs7007887  | T | C | 1.04  | 0.01 | 9.9E-14 | 0.00  | 0.03 | 9.8E-01 |
| snoring     | rs4523230  | A | T | 0.97  | 0.01 | 1.7E-09 | 0.02  | 0.03 | 5.5E-01 |
| snoring     | rs1016013  | A | G | 0.97  | 0.01 | 7.2E-10 | 0.02  | 0.03 | 4.2E-01 |
| snoring     | rs11256034 | T | C | 1.04  | 0.01 | 4.7E-11 | 0.06  | 0.03 | 6.1E-02 |
| snoring     | rs2049045  | C | G | 0.96  | 0.01 | 8.9E-11 | -0.02 | 0.03 | 6.4E-01 |
| snoring     | rs10878269 | T | C | 1.04  | 0.01 | 3.8E-13 | -0.05 | 0.03 | 9.1E-02 |



|         |            |   |   |      |      |         |       |      |         |
|---------|------------|---|---|------|------|---------|-------|------|---------|
| snoring | rs12427782 | T | G | 0.97 | 0.01 | 5.8E-09 | -0.01 | 0.03 | 6.2E-01 |
| snoring | rs2762049  | C | G | 1.04 | 0.01 | 8.7E-09 | 0.08  | 0.03 | 2.2E-03 |
| snoring | rs592333   | G | A | 1.04 | 0.01 | 1.1E-13 | -0.03 | 0.03 | 3.5E-01 |
| snoring | rs2664299  | C | T | 0.97 | 0.01 | 4.5E-08 | 0.02  | 0.03 | 5.3E-01 |
| snoring | rs9933881  | C | T | 1.06 | 0.01 | 8.9E-09 | 0.06  | 0.05 | 2.7E-01 |
| snoring | rs732172   | T | C | 1.03 | 0.01 | 1.3E-09 | 0.01  | 0.03 | 7.8E-01 |
| snoring | rs8047587  | T | G | 1.03 | 0.01 | 2.1E-09 | -0.01 | 0.03 | 7.1E-01 |
| snoring | rs12449843 | A | G | 0.97 | 0.01 | 4.4E-10 | 0.00  | 0.03 | 8.9E-01 |
| snoring | rs1641511  | G | A | 1.03 | 0.01 | 1.4E-08 | 0.05  | 0.03 | 1.0E-01 |
| snoring | rs57222984 | G | A | 1.04 | 0.01 | 3.0E-11 | 0.01  | 0.03 | 8.0E-01 |
| snoring | rs2924251  | A | G | 1.03 | 0.01 | 5.2E-09 | 0.00  | 0.03 | 9.0E-01 |
| snoring | rs180107   | A | T | 0.97 | 0.01 | 3.9E-09 | -0.01 | 0.03 | 8.0E-01 |
| snoring | rs4987719  | T | C | 1.08 | 0.01 | 3.6E-08 | -0.07 | 0.08 | 3.3E-01 |
| snoring | rs10415992 | G | C | 0.95 | 0.01 | 8.1E-09 | -0.02 | 0.05 | 6.9E-01 |
| snoring | rs34107769 | C | T | 0.97 | 0.01 | 9.9E-09 | 0.00  | 0.03 | 9.2E-01 |
| snoring | rs6099273  | T | C | 1.03 | 0.01 | 1.2E-08 | 0.02  | 0.03 | 5.0E-01 |

Note: SNP, EA, effect allele; OA, other allele; EAF, effect allele frequency; Se, standard error;

getting up, The ease of getting up in the morning.

Table S7. Sensitivity analyses of sleep traits with CAD with diabetes.

| <b>Sleep traits</b> | <b>Method</b>   | <b>OR</b> | <b>95% CI</b> | <b><i>p</i>-value</b> |
|---------------------|-----------------|-----------|---------------|-----------------------|
| Insomnia            | Weighted median | 1.13      | 1.00 – 1.27   | 0.08                  |
|                     | MR-Egger        | 1.04      | 0.67 – 1.41   | 0.84                  |
|                     | MR-PRESSO       | 1.16      | 1.07 – 1.25   | 0.01                  |
| Sleep duration      | Weighted median | 1.00      | 0.98 – 1.01   | 0.56                  |
|                     | MR-Egger        | 0.99      | 0.96 – 1.02   | 0.45                  |
|                     | MR-PRESSO       | 1.00      | 0.98 – 1.00   | 0.08                  |
| Easy to get up      | Weighted median | 0.57      | -0.39 – 1.53  | 0.25                  |
|                     | MR-Egger        | 0.27      | -2.24 – 2.78  | 0.31                  |
|                     | MR-PRESSO       | 0.85      | 0.11 – 1.60   | 0.68                  |
| Morningness         | Weighted median | 0.92      | 0.55 – 1.28   | 0.64                  |
|                     | MR-Egger        | 0.70      | -0.06 – 1.46  | 0.36                  |
|                     | MR-PRESSO       | 1.05      | 0.80 – 1.30   | 0.70                  |
| Snoring             | Weighted median | 1.01      | 1.00 – 1.02   | 0.54                  |
|                     | MR-Egger        | 1.18      | 0.88 – 1.47   | 0.28                  |
|                     | MR-PRESSO       | 1.01      | 1.00 – 1.02   | 0.01                  |

Note: OR, odds ratio; CI, confidence interval; MR, Mendelian randomization; MR-PRESSO, MR-pleiotropy residual sum and outlier; Easy to get up, ease of getting up in the morning.

## **Figure Legend**

**FigureS1.** Sensitivity analysis (A), scatter plot (B), forest plot (C), and funnel plot (D) of the causal effect of insomnia on CAD in patients with diabetes.

**FigureS2.** Sensitivity analysis (A), scatter plot (B), forest plot (C), and funnel plot (D) of the causal effect of sleep duration on CAD in patients with diabetes.

**FigureS3.** Sensitivity analysis (A), scatter plot (B), forest plot (C), and funnel plot (D) of the causal effect of getting up on CAD in patients with diabetes.

**FigureS4.** Sensitivity analysis (A), scatter plot (B), forest plot (C), and funnel plot (D) of the causal effect of morningness on CAD in patients with diabetes.

**FigureS5.** Sensitivity analysis (A), scatter plot (B), forest plot (C), and funnel plot (D) of the causal effect of snoring on CAD in patients with diabetes

**FigureS1.** Sensitivity analysis (A), scatter plot (B), forest plot (C), and funnel plot (D) of the causal effect of insomnia on CAD in patients with diabetes.

(A)

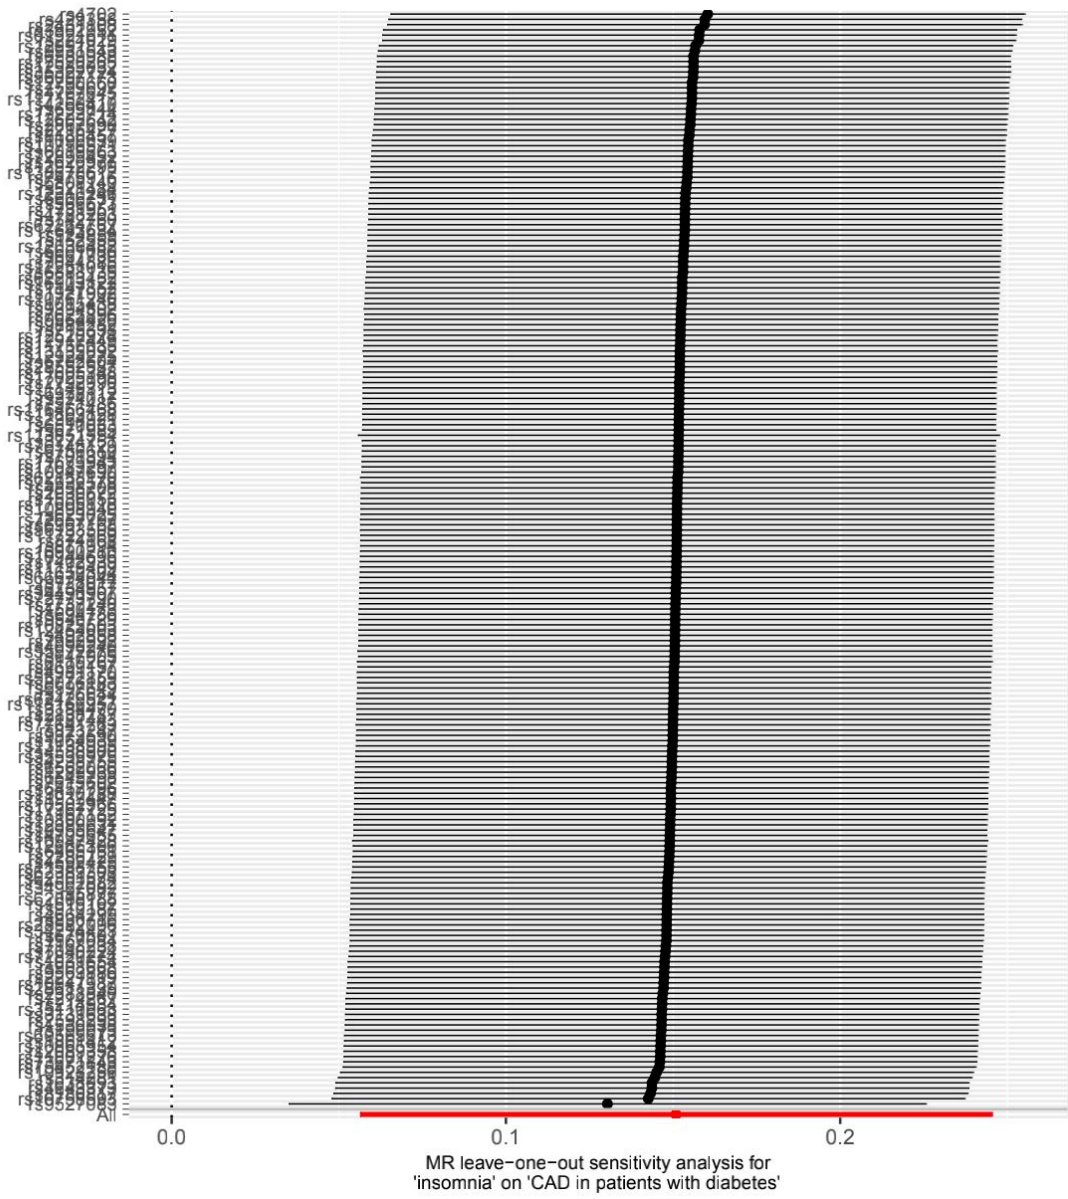

FigureS1.(B)

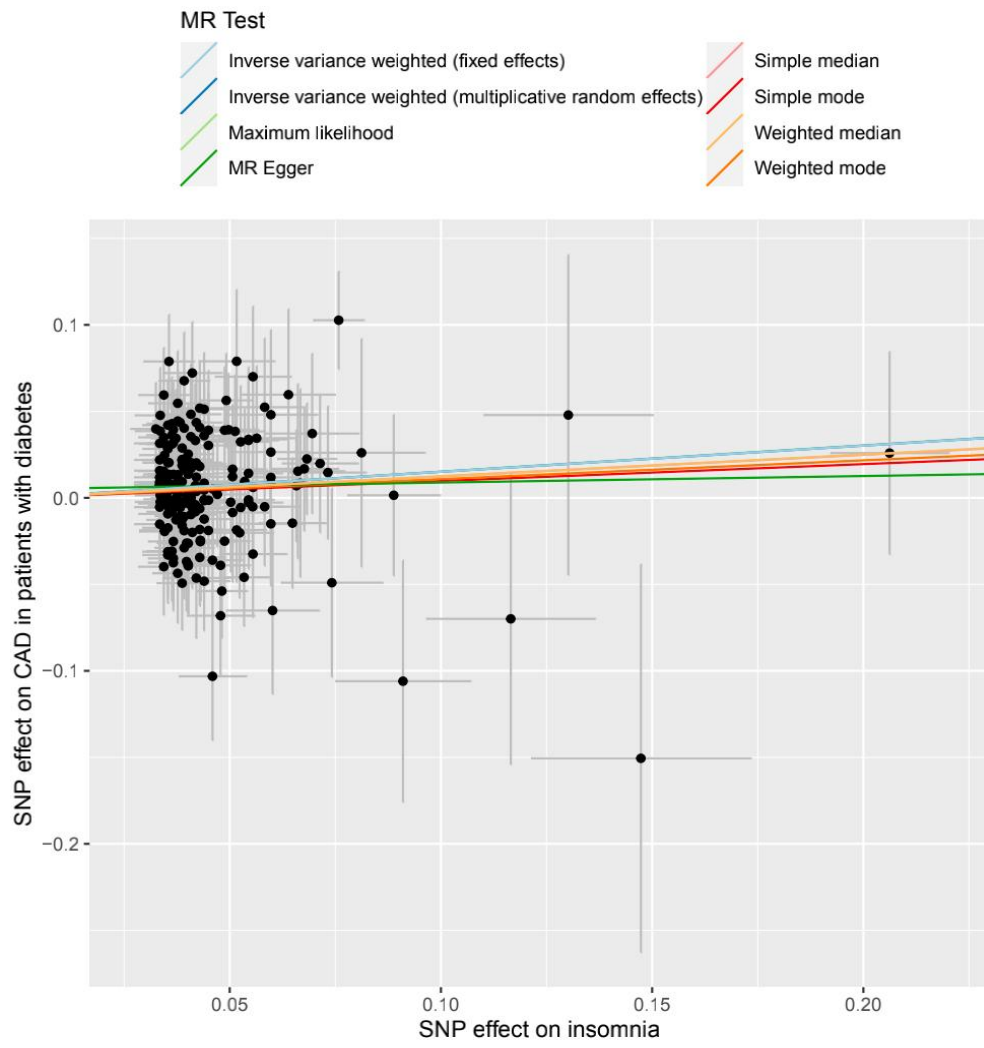

FigureS1.(C)

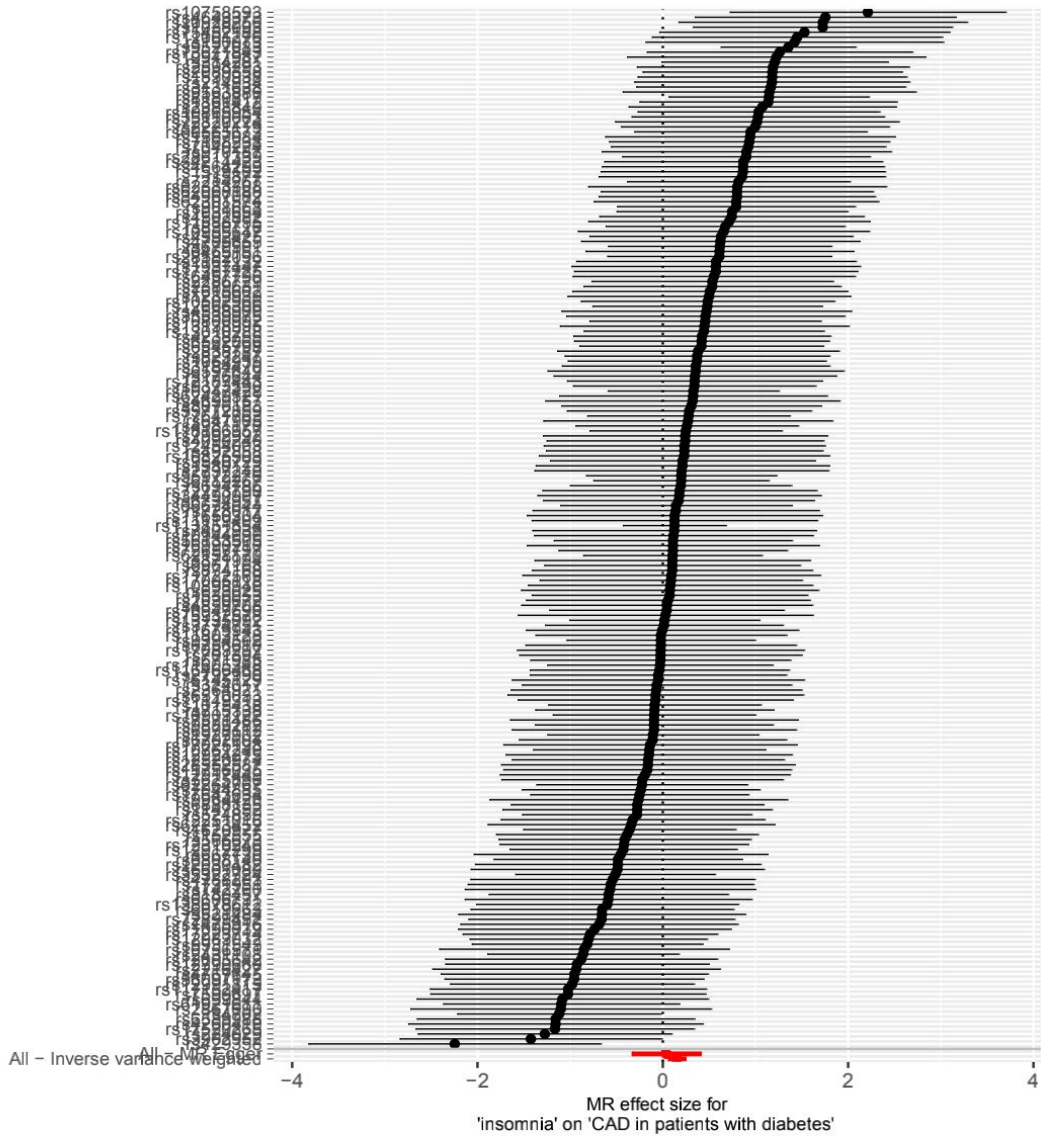

FigureS1.(D)

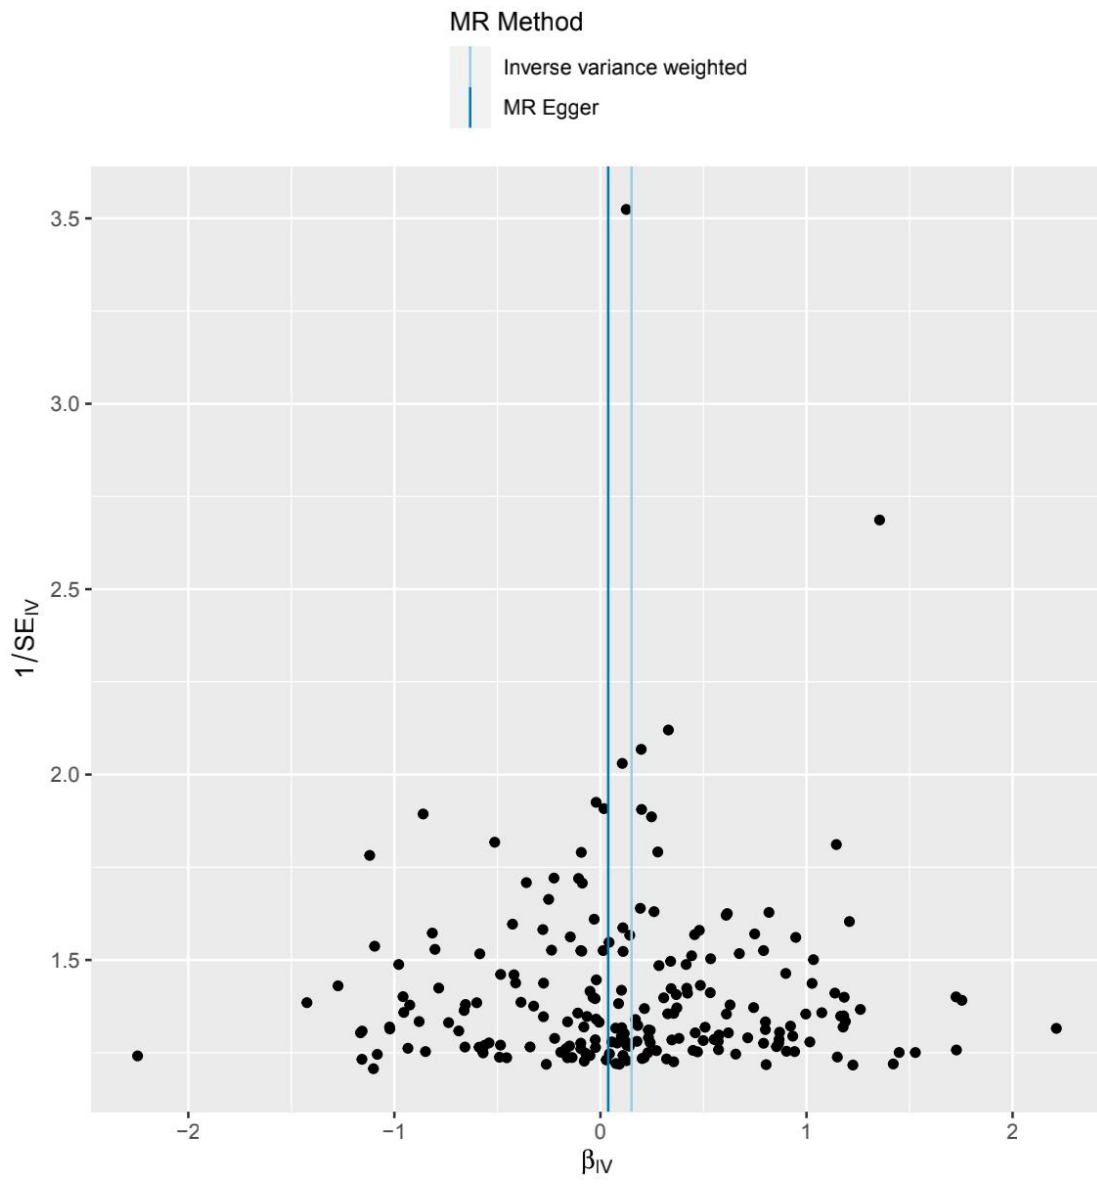

**FigureS2.** Sensitivity analysis (A), scatter plot (B), forest plot (C), and funnel plot (D) of the causal effect of sleep duration on CAD in patients with diabetes.

(A)

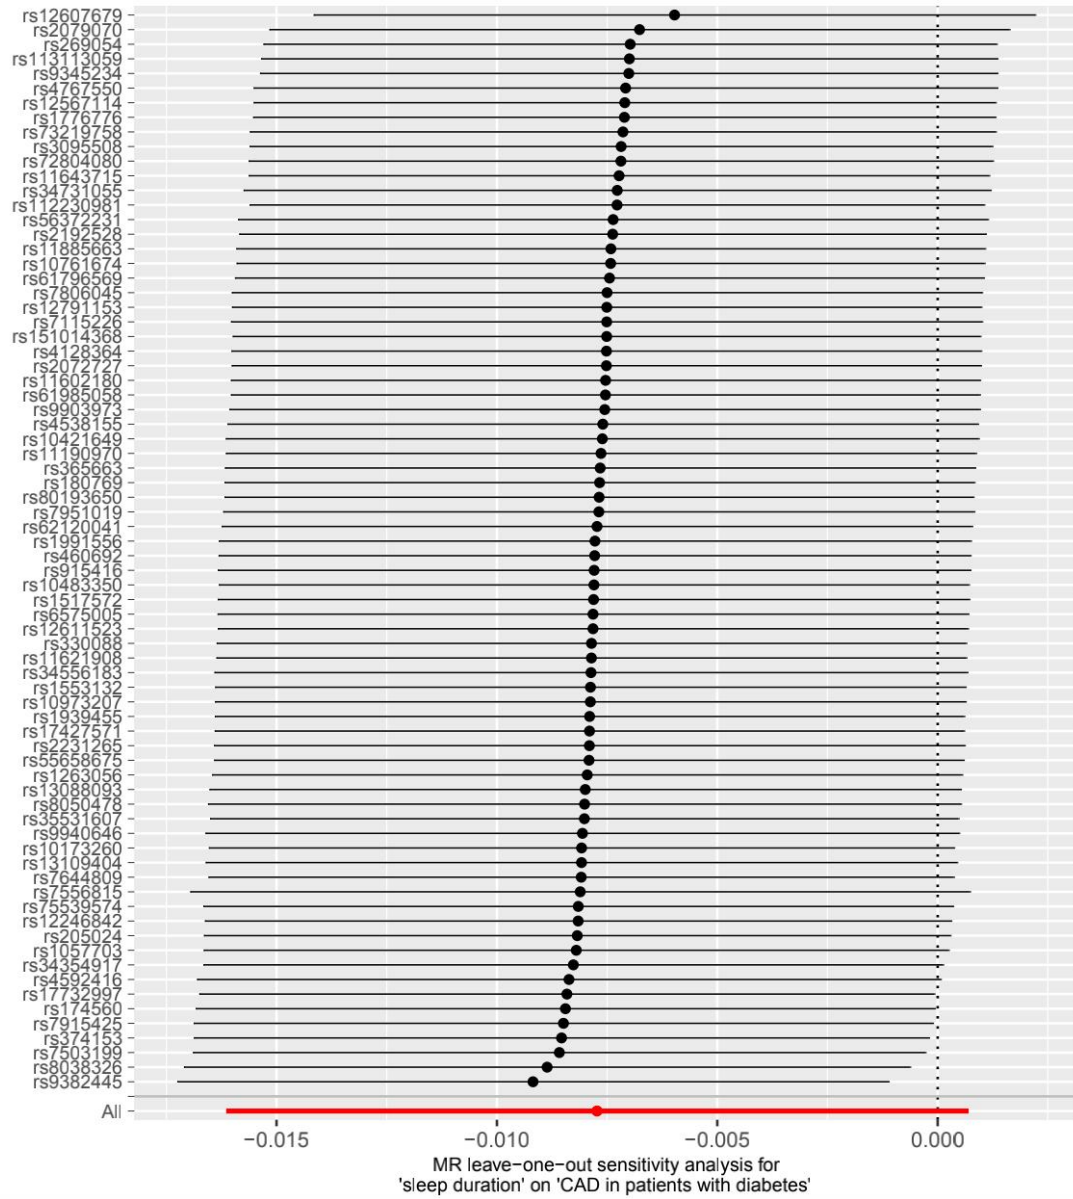



FigureS2.(B)

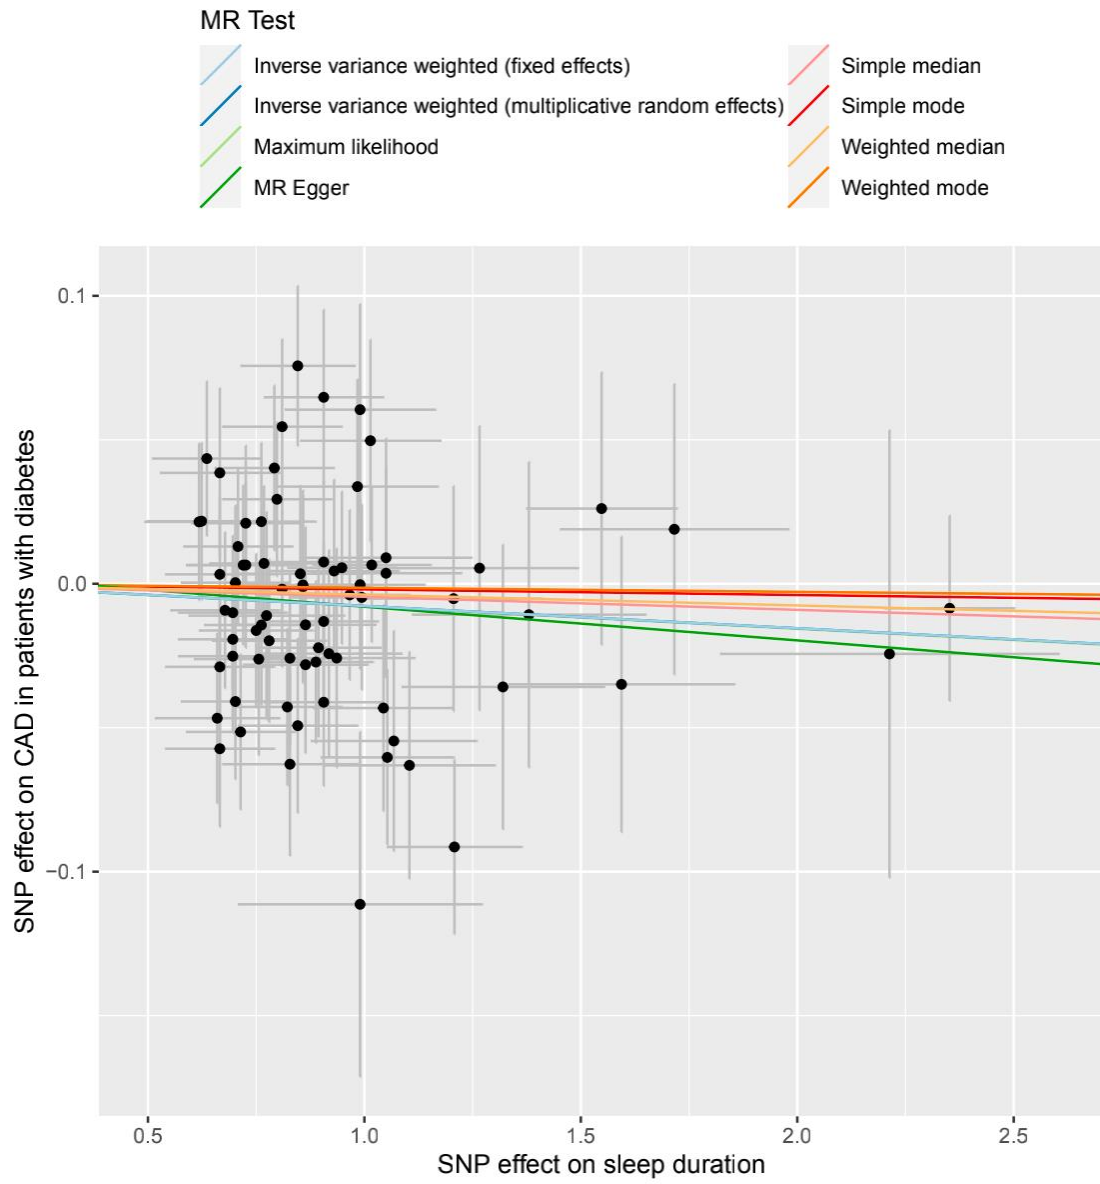

FigureS2.(C)

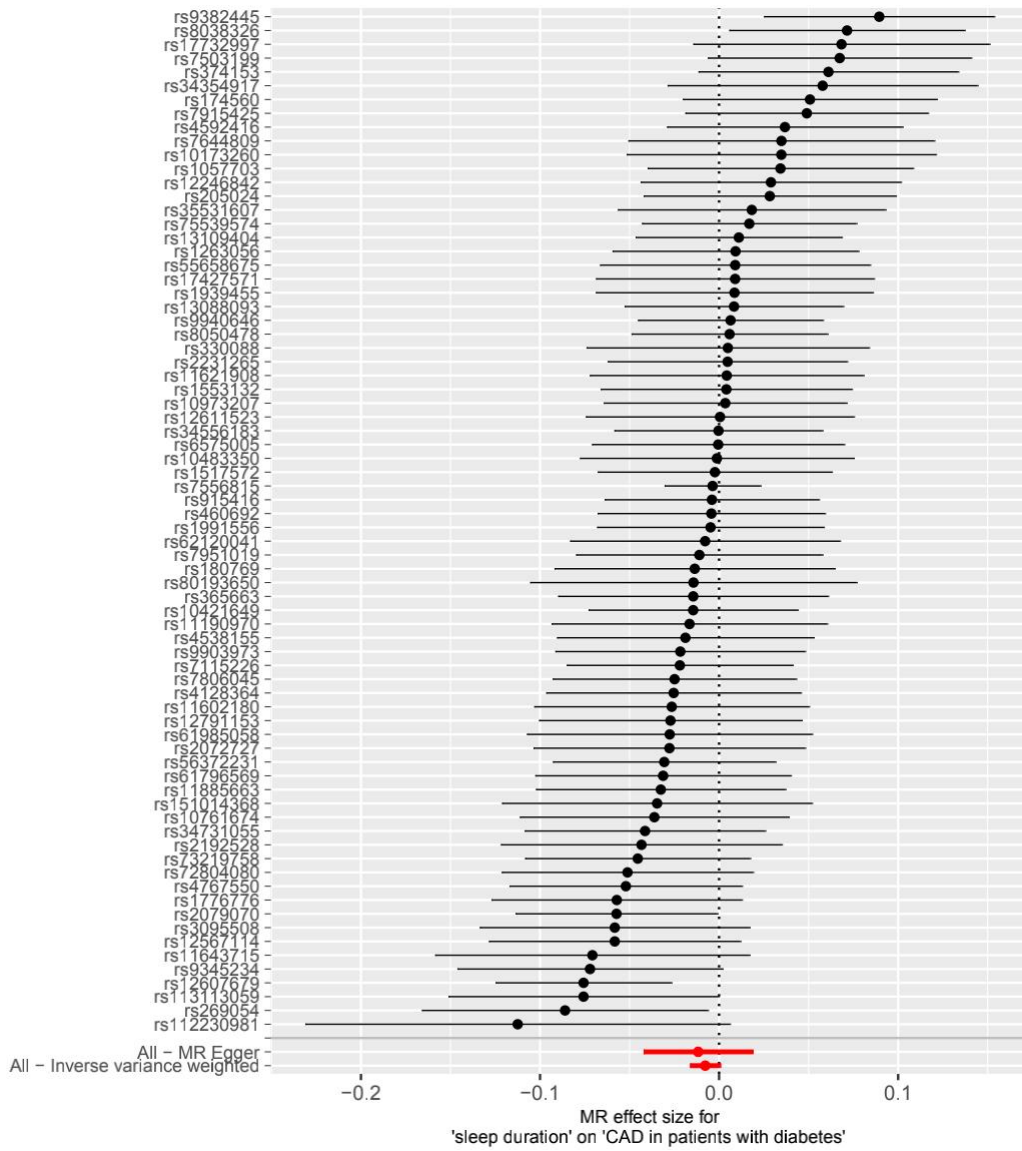

FigureS2.(D)

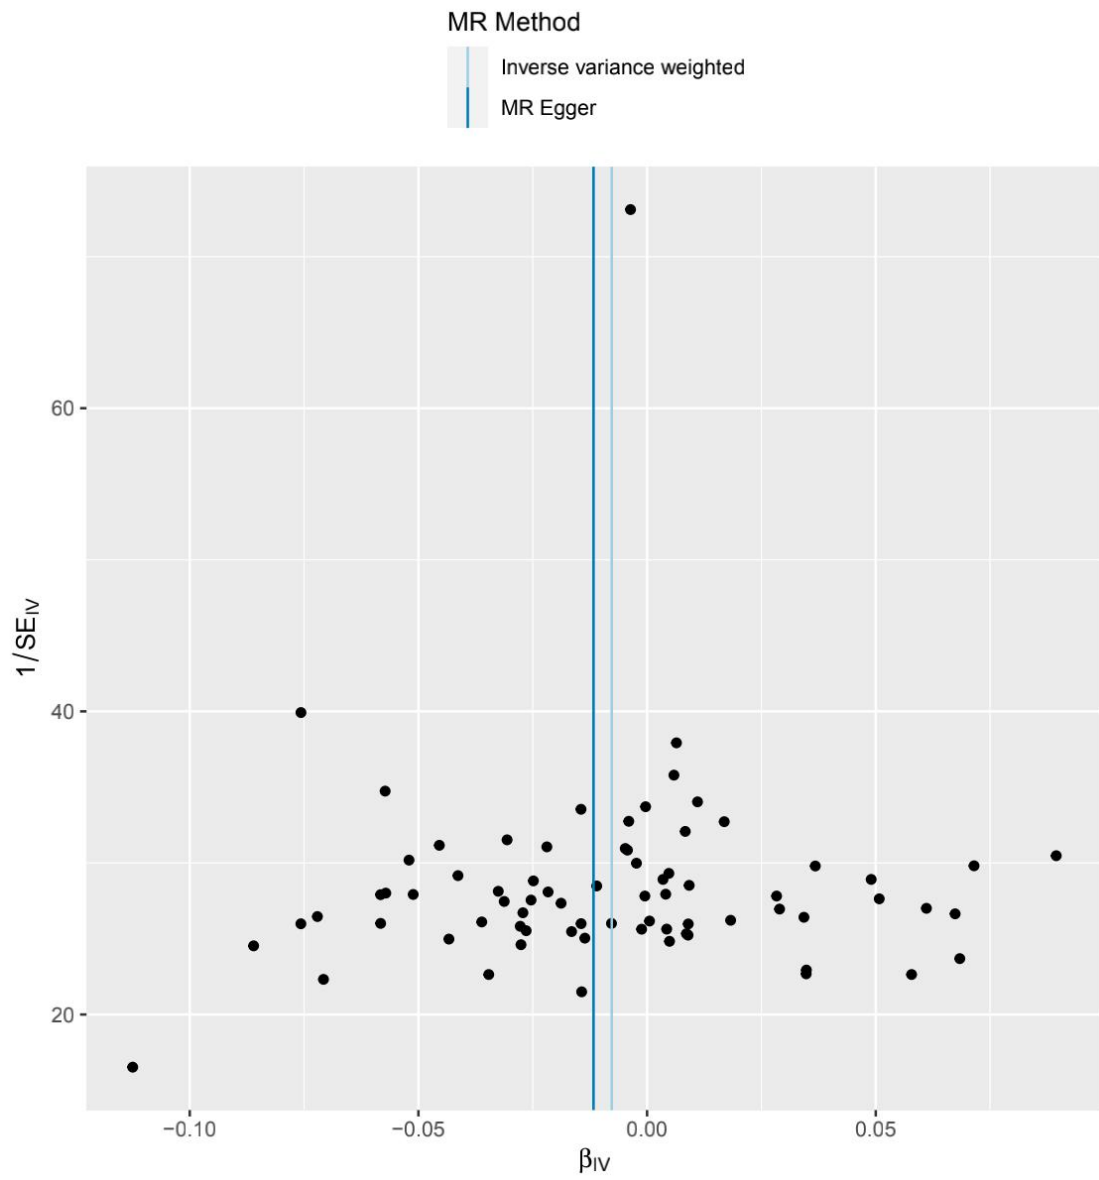

**FigureS3.** Sensitivity analysis (A), scatter plot (B), forest plot (C), and funnel plot (D) of the causal effect of getting up on CAD in patients with diabetes.

(A)

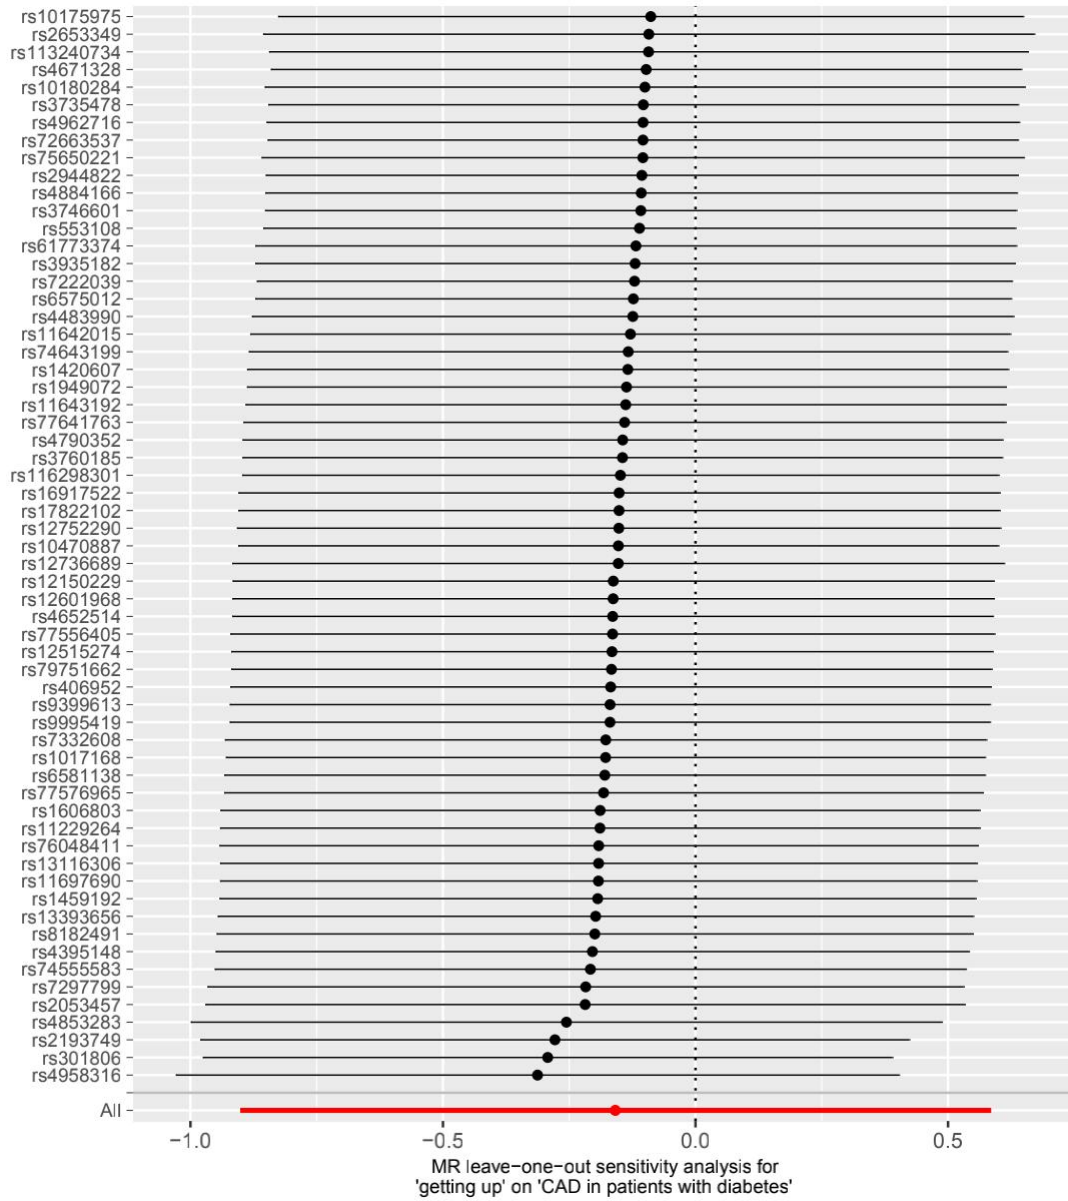

FigureS3.(B)

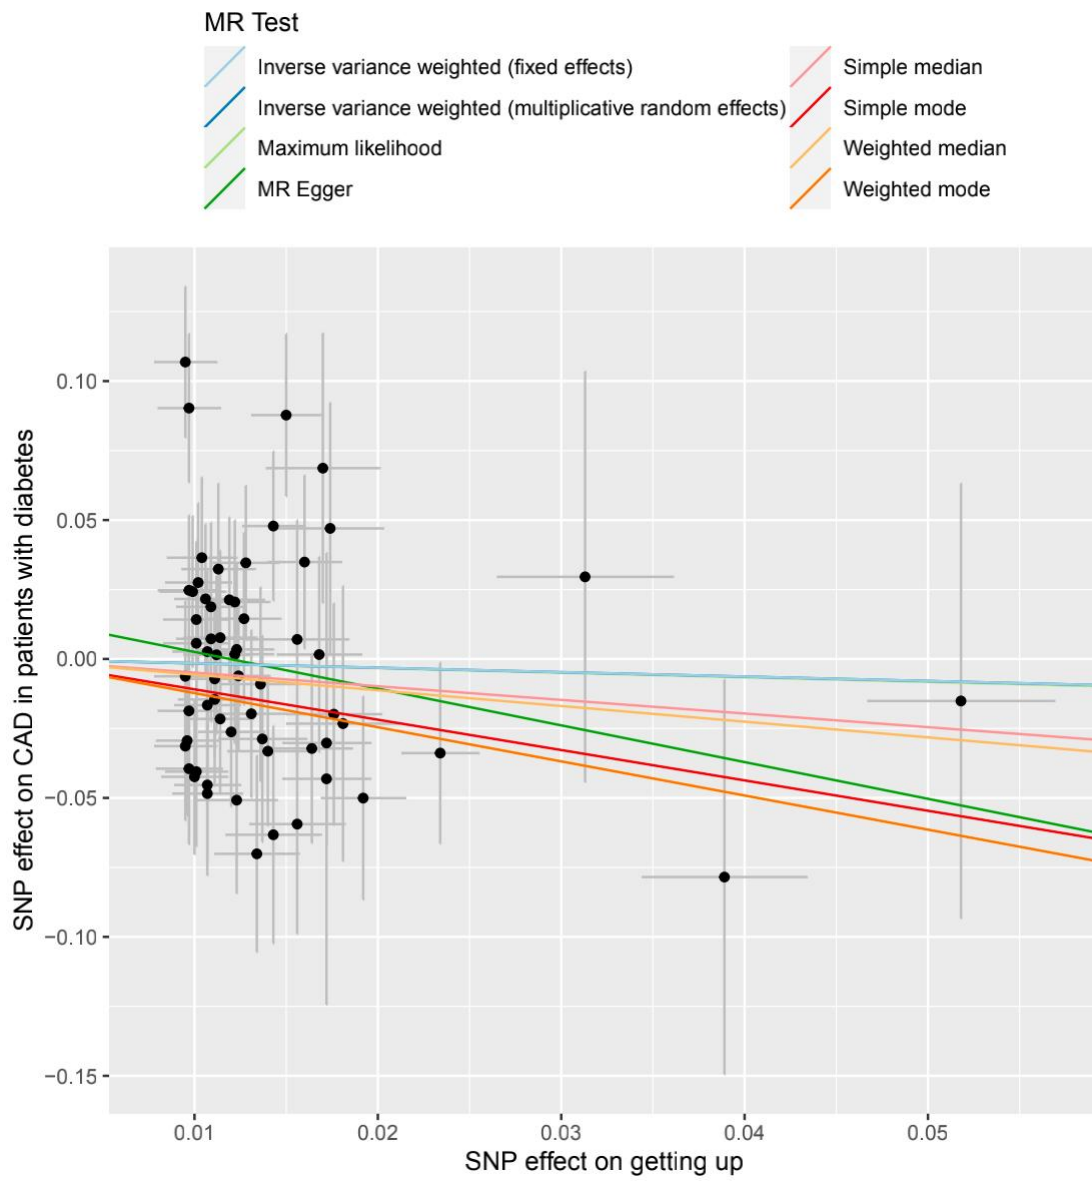

FigureS3.(C)

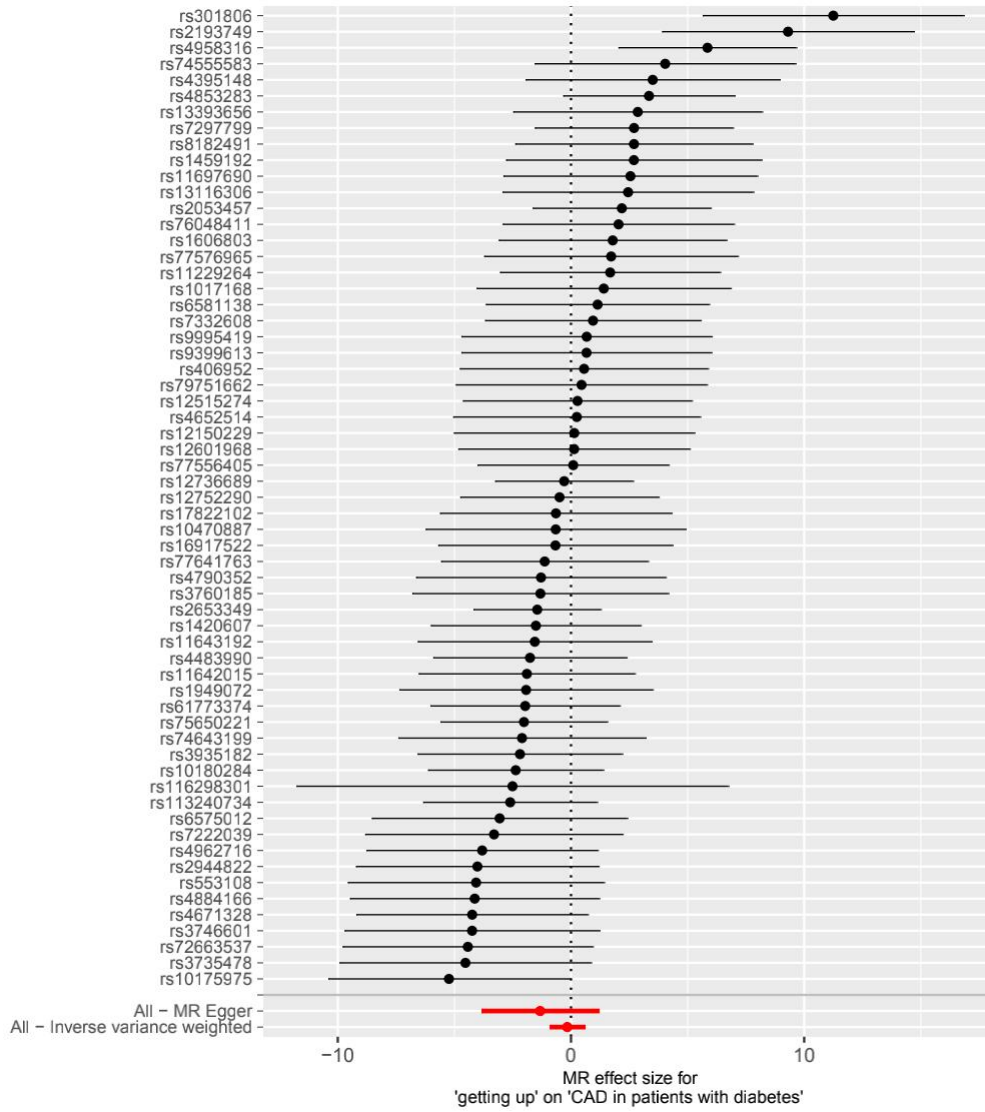

FigureS3.(D)

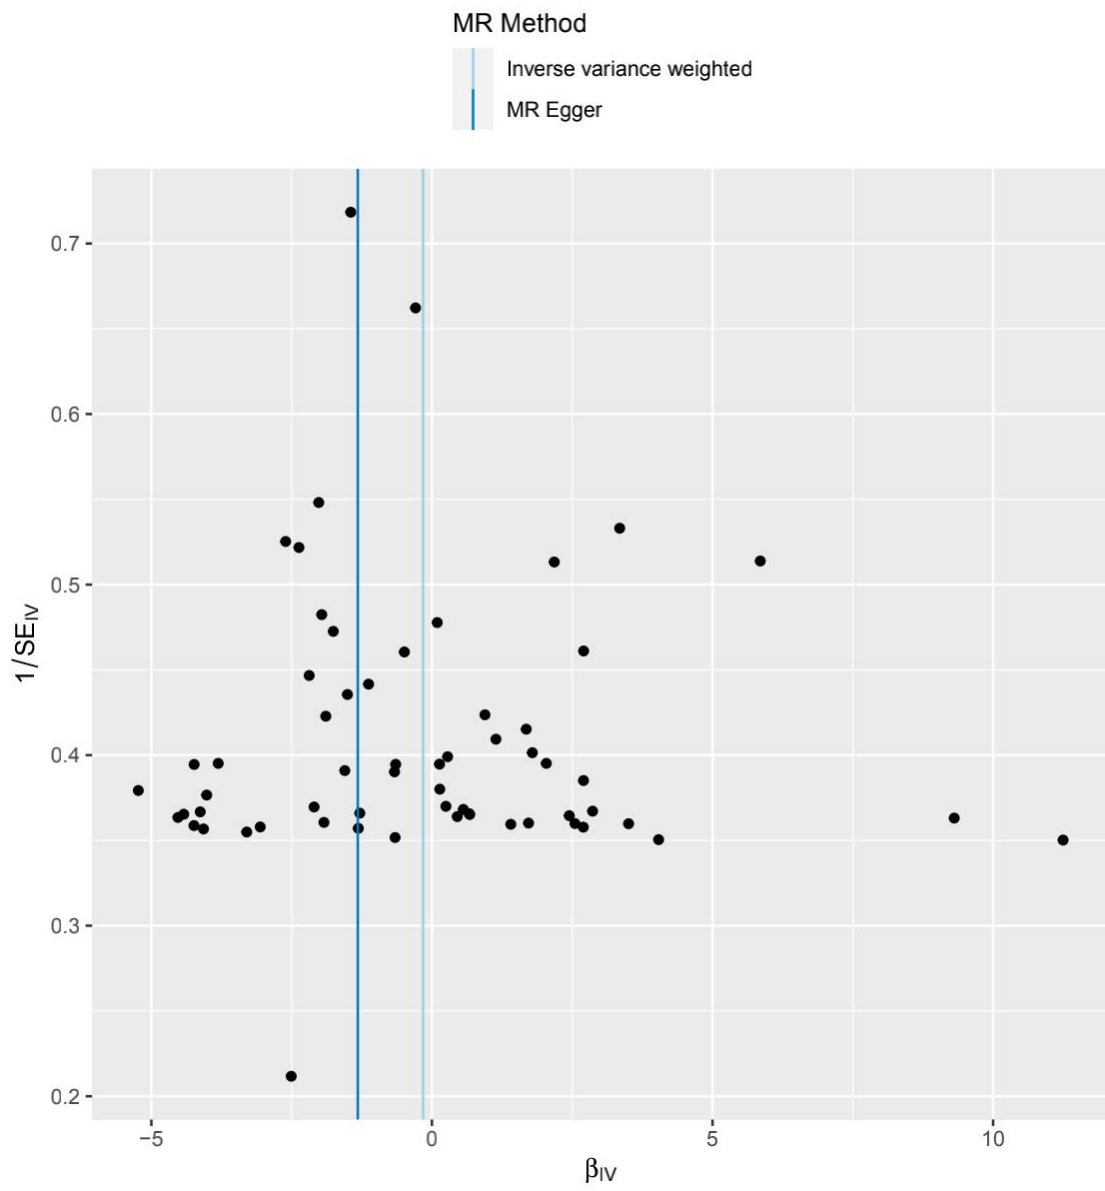

**FigureS4.** Sensitivity analysis (A), scatter plot (B), forest plot (C), and funnel plot (D) of the causal effect of morningness on CAD in patients with diabetes.

(A)

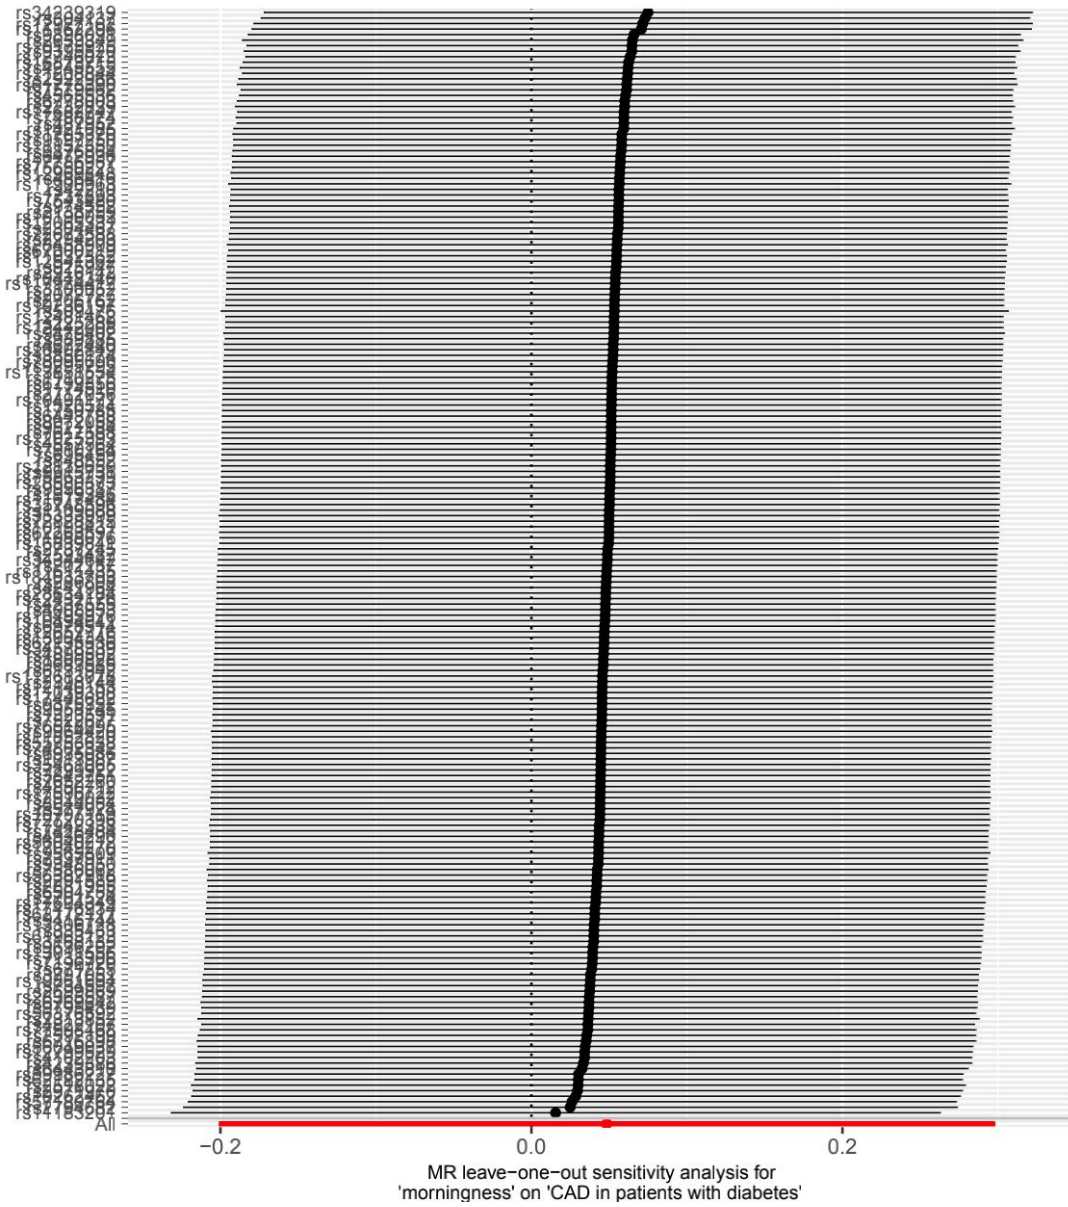



FigureS4.(B)

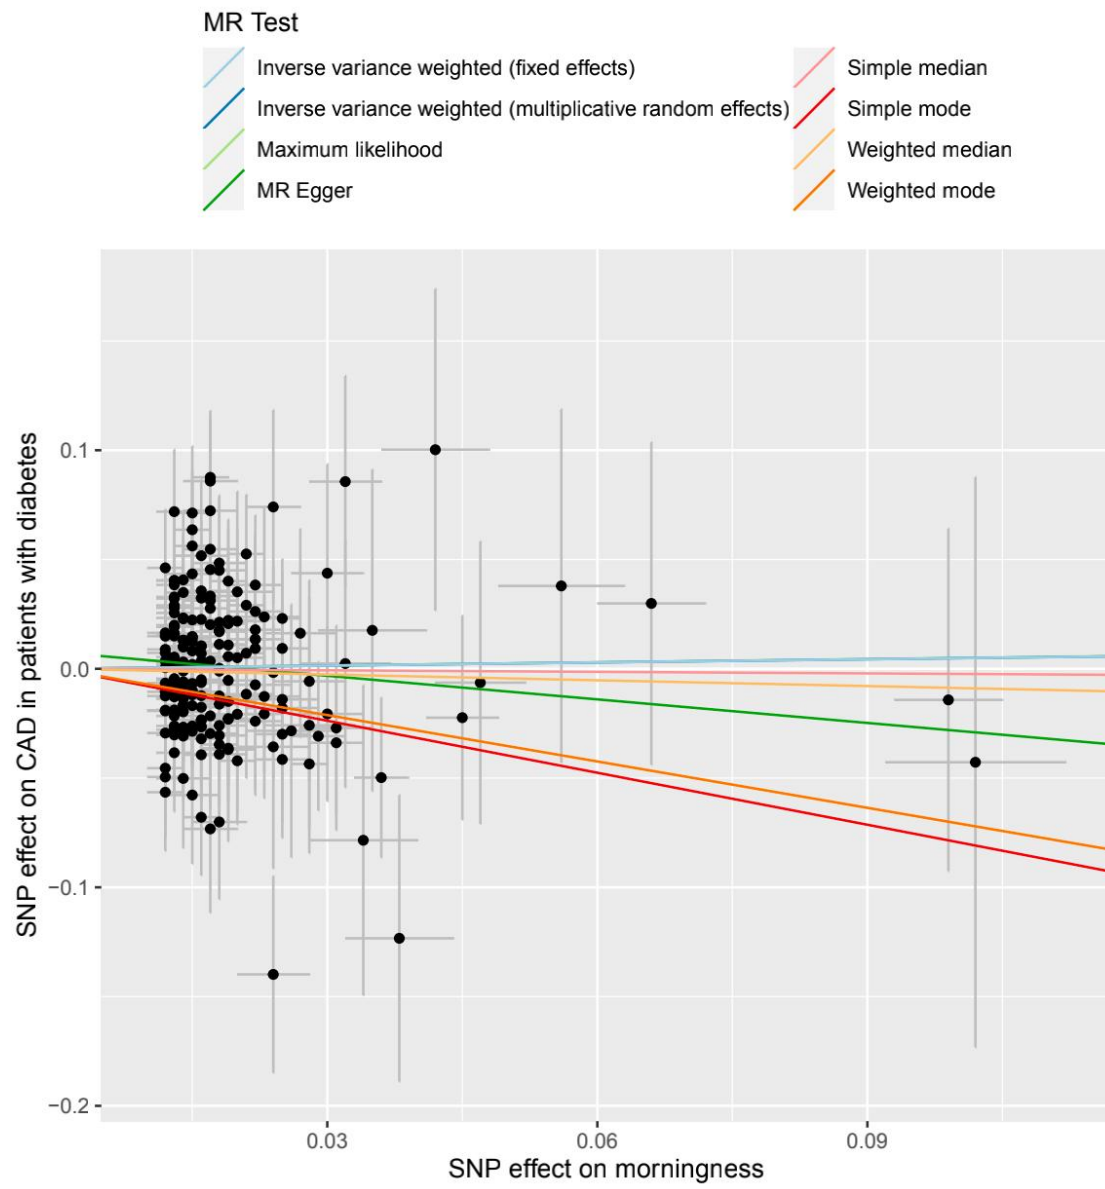

FigureS4.(C)

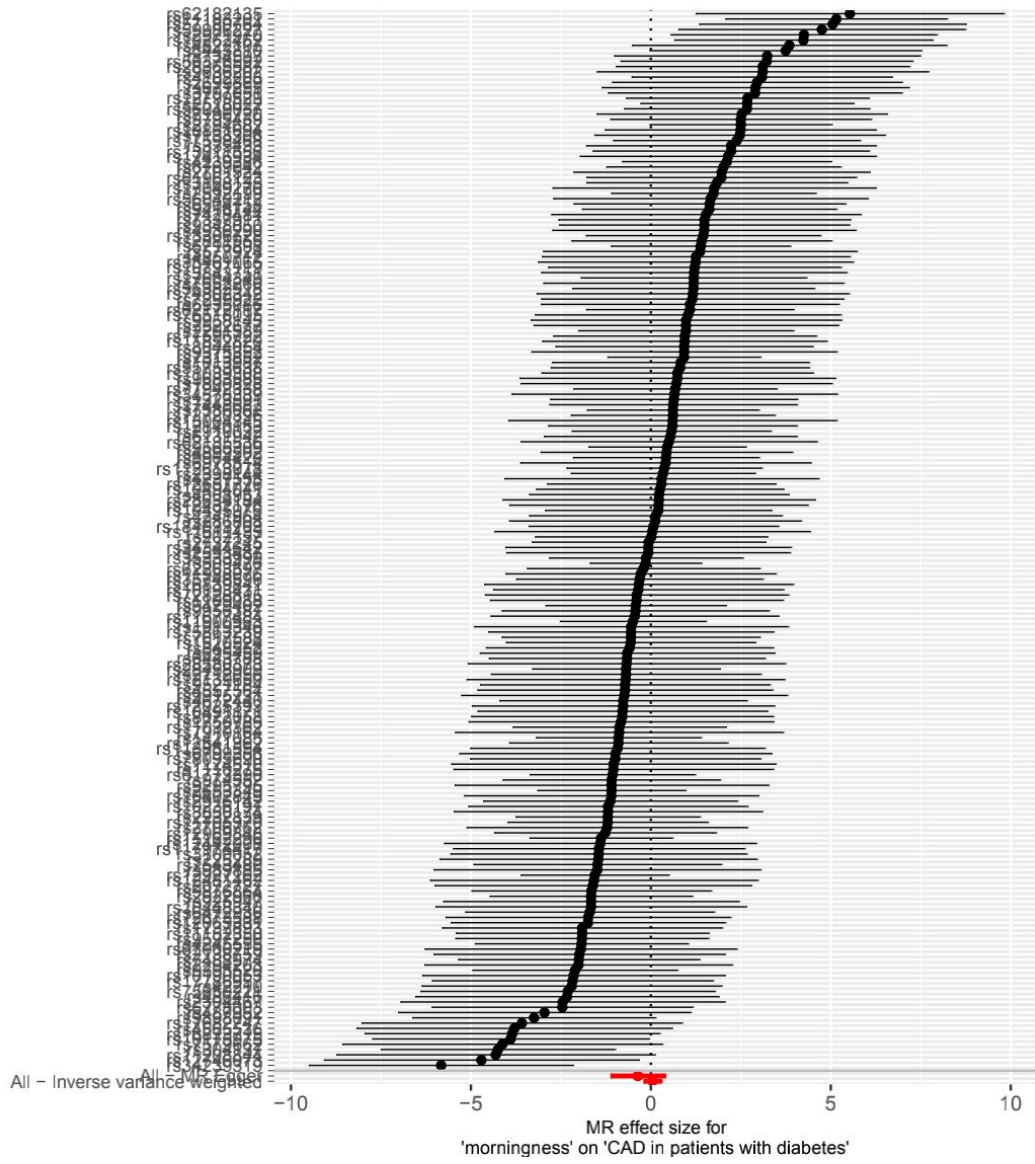

FigureS4.(D)

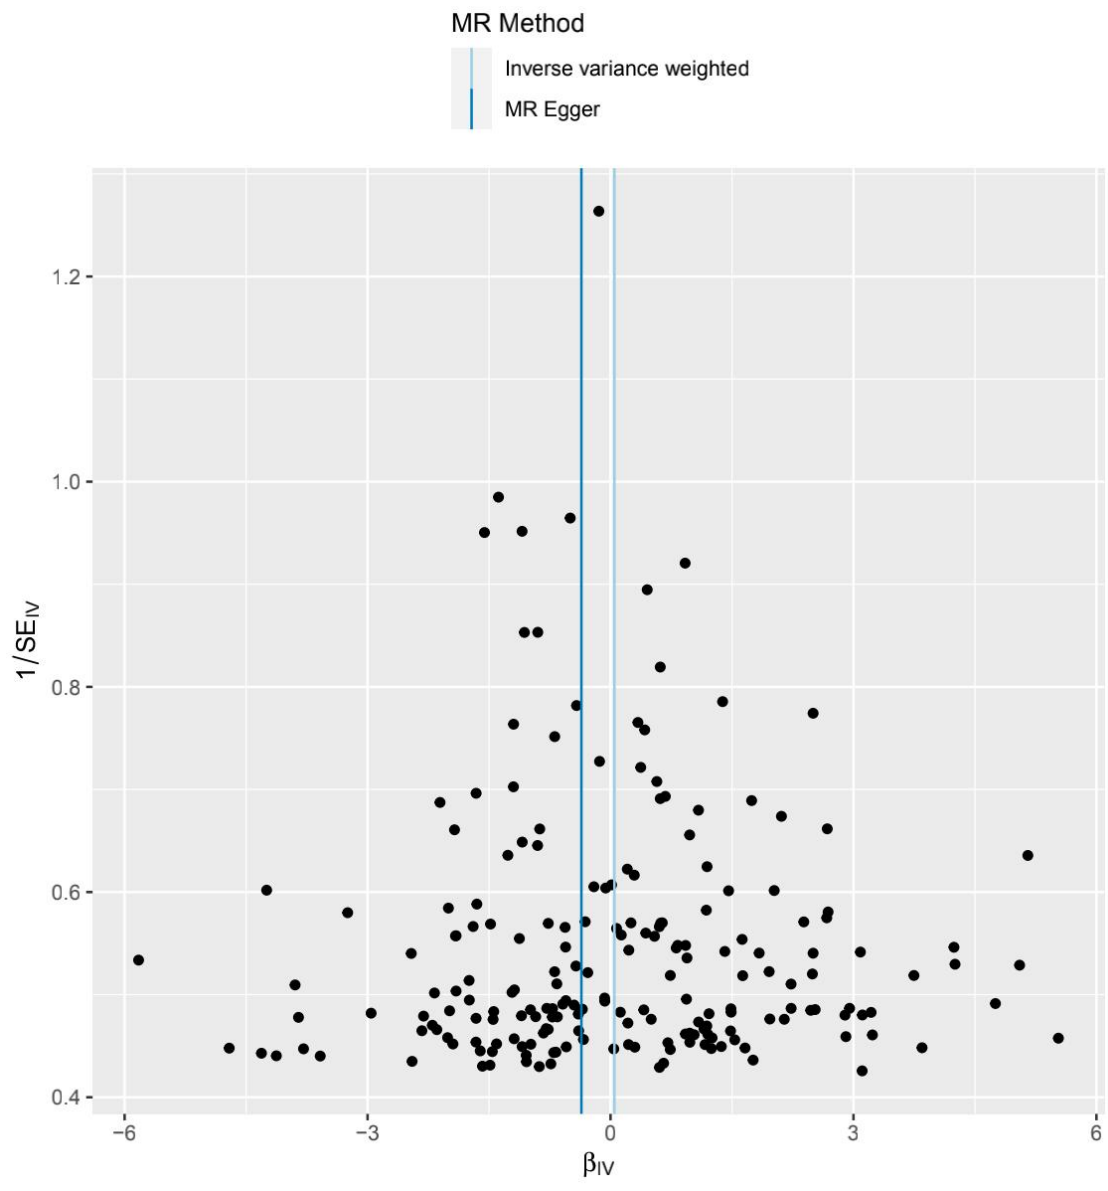

**FigureS5.** Sensitivity analysis (A), scatter plot (B), forest plot (C), and funnel plot (D) of the causal effect of snoring on CAD in patients with diabetes.

(A)

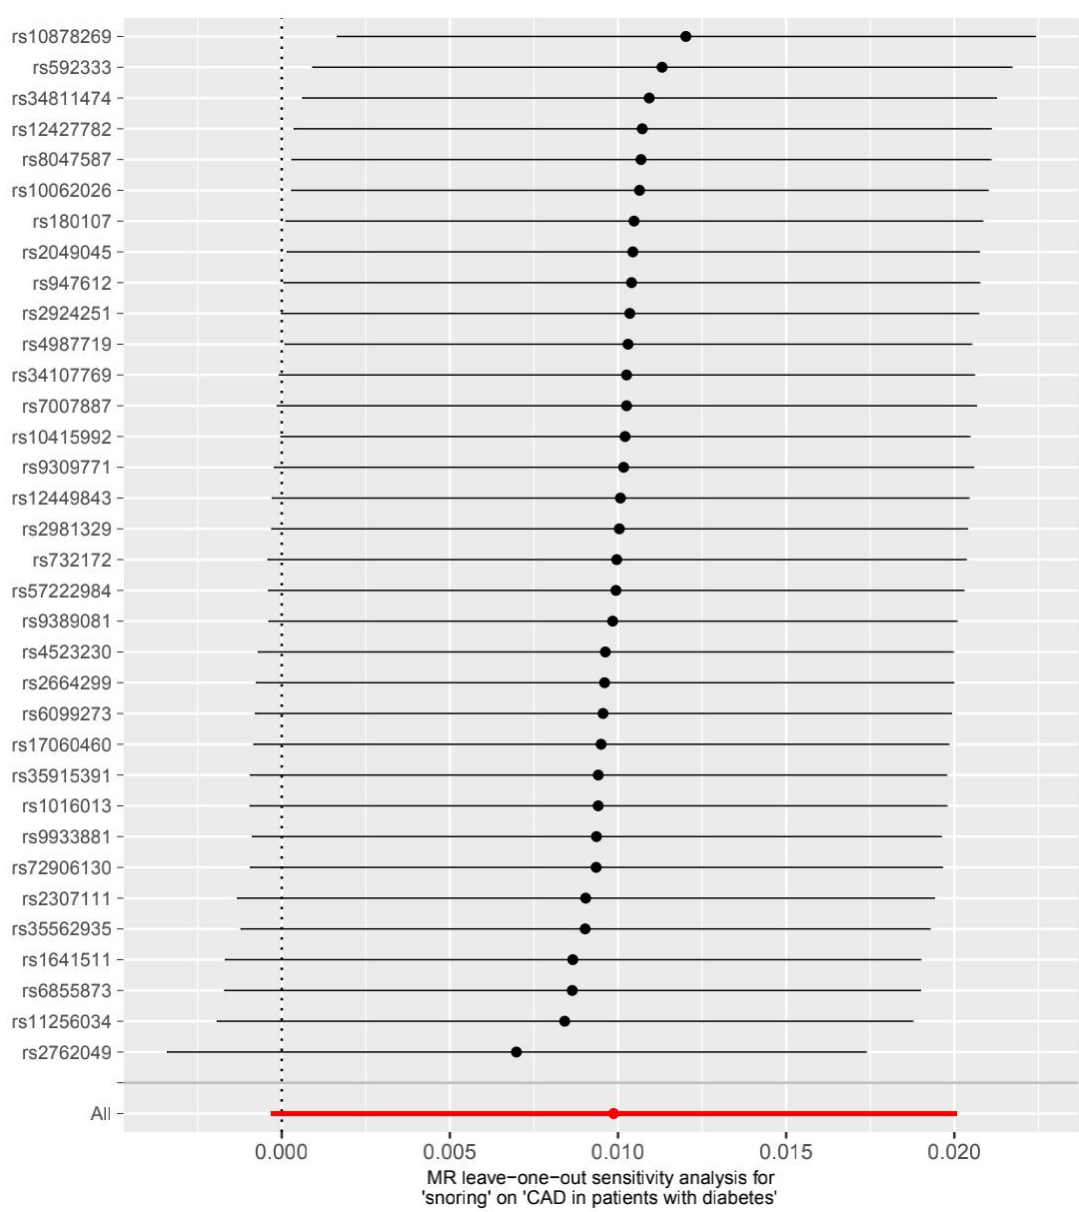

FigureS5.(B)

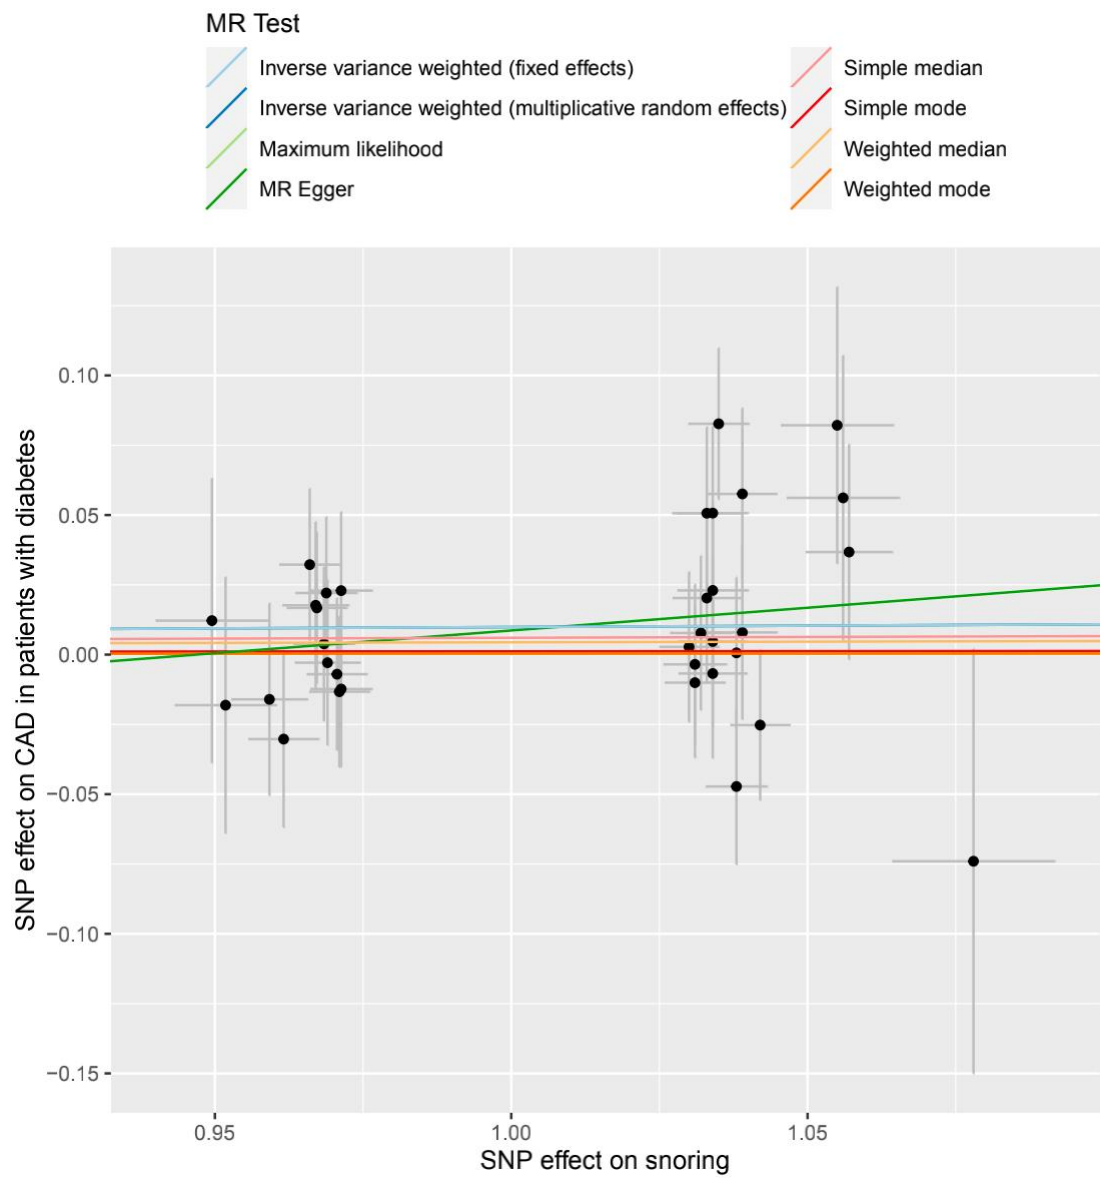

FigureS5. (C)

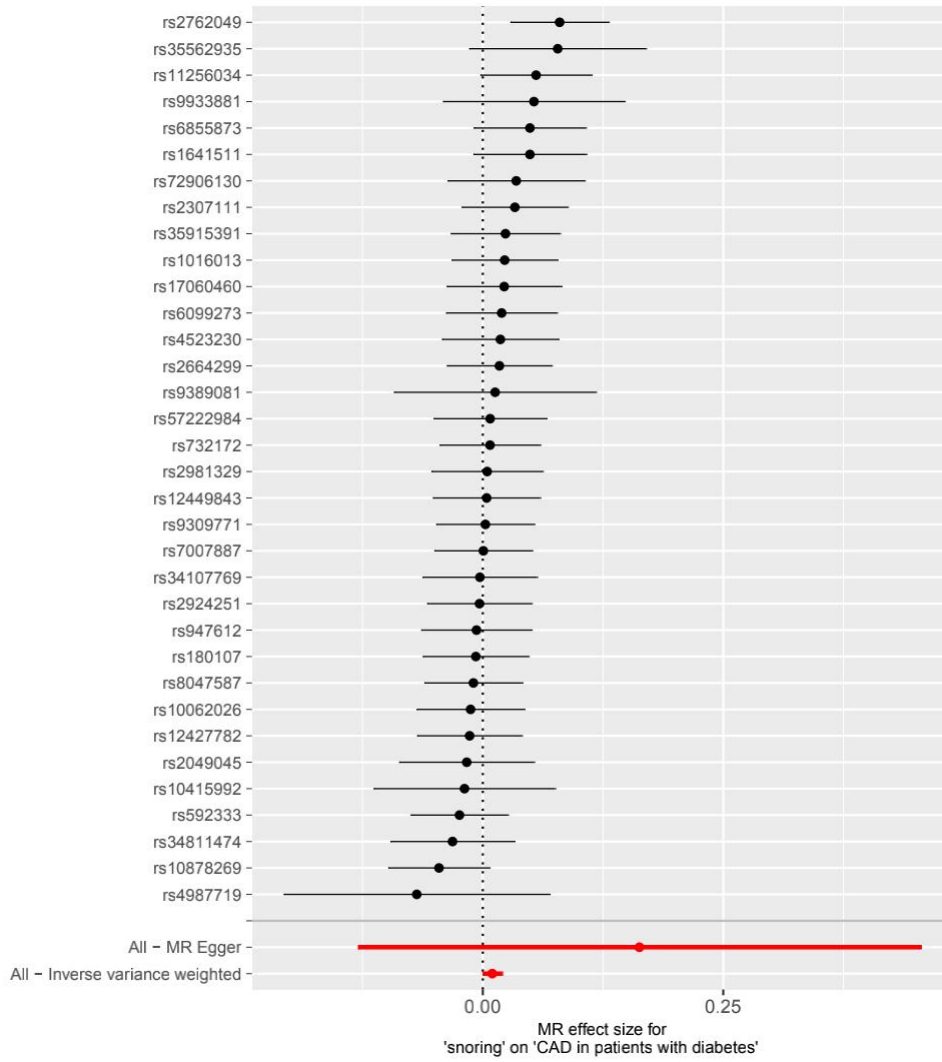

FigureS5. (D)

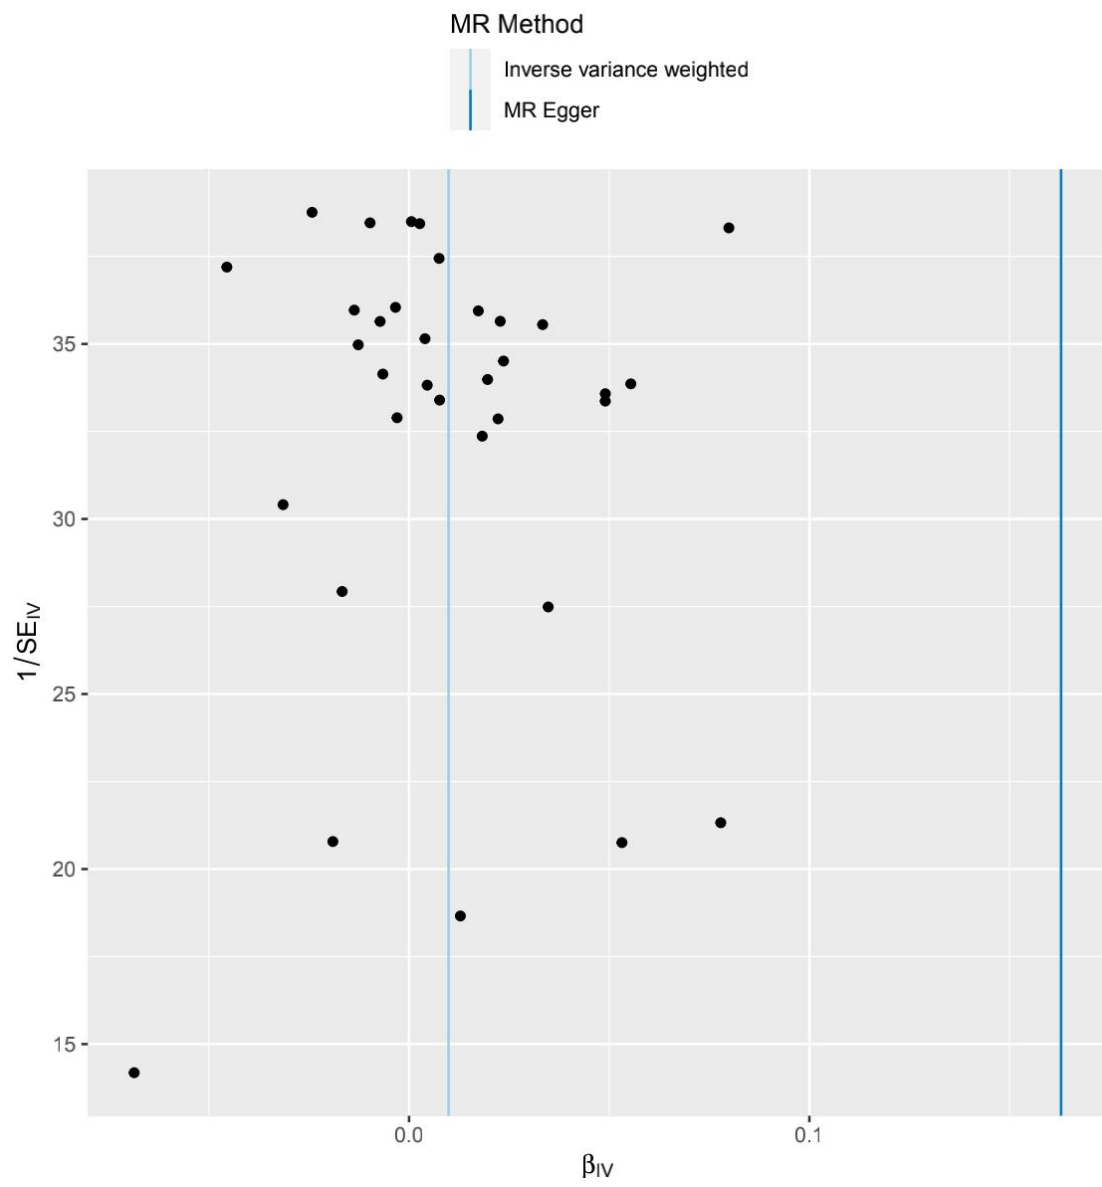

Supplement: Datasheet1.pdf [file Datasheet1.pdf]
